# Supplementary material for: Sex differences in long-term mortality among acute myocardial infarction patients: Results from the ISAR-RISK and ART studies
Source: PLoS One. 2017 Oct 20;12(10):e0186783. doi: 10.1371/journal.pone.0186783 (PMC5650173; doi:10.1371/journal.pone.0186783)
Supplement: S1 Table — PtNo: Patient Number, AMI: acute myocardial infarction, SR: sinus rhythm, CKmax: maximal level of creatine kinase, LVEF: left ventricular ejection fraction, CAD: coronary artery disease, ASS: acetylsalicylic acid, ACE_inhibitors: angiotensin-converting enzyme inhibitor, CSE_inhibitors: cholesterol synthesis enzyme inhibitor, fup_time: follow-up time. (XLSX) [file pone.0186783.s001.xlsx]

## Sheet: n3840_Publ
PtNo.	sex (0=male; 1=female)	MatchedPairs (1=matched; 2=unmatched)	Age	Hypertension (1=yes; 0=no)	Diabetes (1=yes; 0=no)	Smokers (1=yes; 0=no)	Creatinine	Previous_AMI (1=yes; 0=no)	Non_SR (1=noSR; 0=SR)	CKmax	LVEF	Coronary_angiography (1=yes; 0=no)	Extent of CAD (0=no CAD; 1=one-vessel CAD; 2=2-vessel CAD; 3=3vessel CAD)	acute_therapy_AMI	ASS (1=yes; 0=no)	beta_blockers (1=yes; 0=no)	ACE_inhibitors (1=yes; 0=no)	CSE_inhibitors (1=yes; 0=no)	Diuretics (1=yes; 0=no)	fup_time_upto 5years (in years)	all_cause_mortality_upto 5years (1=yes; 0=no)
1	0	2	75.3014	1	1	0	1.2	0	1	2398	44	1	2	Lysis	1	1	1	0	1	3.80822	0
2	0	2	44.3425	1	0	1	1.7	0	0	798	42	1	1	CABG	1	1	1	1	1	3.70685	0
3	0	1	58.8301	0	0	0	1	0	0	3152	68	1	2	conservative	1	1	1	1	0	5	0
4	1	2	76.7315	1	1	0	0.9	0	0	1238	60	1	3	CABG	1	1	1	1	0	4.5589	0
5	0	2	36.3288	0	0	1	1.1	0	0	696	76	1	2	Lysis	1	1	1	1	0	5	0
6	1	1	76.4027	1	0	0	1.5	0	0	684	51	1	3	PCI	1	1	1	1	1	4.97534	0
7	0	1	54.0767	0	0	1	1	0	0	780	58	1	1	Lysis	1	1	1	1	1	4.28493	0
8	0	2	56.8329	0	0	0	1.2	0	0	2418.89	48	1	1	PCI	0	0	0	0	0	5	0
9	0	1	78.6192	0	1	0	1.5	0	0	3568	53	1	3	PCI	1	1	1	1	1	4.2137	0
10	0	2	77.8164	1	0	1	0.8	0	0	672	36	1	1	conservative	1	1	1	1	1	3.25479	1
11	0	1	73.0849	1	1	0	0.9	0	0	3494	40	1	2	PCI	1	1	1	1	1	3.44932	1
12	0	2	60.9918	1	0	0	1.2	0	0	10206	45	1	2	PCI	1	1	1	1	0	3.90685	0
13	1	1	81.8493	1	0	0	0.8	0	0	2788.6	38	1	3	PCI	1	1	1	1	0	3.89041	0
14	0	2	63.1671	1	1	1	1.5	0	0	1574	69	1	3	Lysis	1	1	1	1	0	3.86027	0
15	1	1	63.9671	1	1	0	1.1	0	0	698	55	1	3	PCI	1	1	1	1	0	4.49315	0
16	0	2	59.7507	0	0	0	1	1	0	4411.74	73	1	2	PCI	1	1	1	1	1	2.12877	1
17	0	2	67.063	1	1	1	0.9	1	0	1328	55	1	2	PCI	1	1	1	1	1	4.3589	0
18	0	1	66.6219	1	0	0	1.7	0	0	148	70	1	1	PCI	1	1	1	1	0	0.410959	1
19	1	1	66.537	1	1	0	2	1	0	42	31	1	3	PCI	1	1	1	1	1	2.09041	1
20	0	1	63.8438	0	0	0	1.3	0	0	1700	56	1	2	PCI	1	1	1	1	0	3.86027	0
21	0	2	51.0959	1	0	1	0.9	0	0	1000	68	1	2	PCI	1	1	1	1	0	5	0
22	0	2	71.6493	0	0	1	1.6	0	0	2860	52	1	2	PCI	1	1	1	1	1	3.66027	0
23	1	2	58.8164	0	0	0	0.707027	0	0	1000	77	1	1	PCI	1	1	1	1	0	3.92877	0
24	0	2	44.8849	1	0	0	1.1	0	0	968	63	1	2	PCI	1	1	1	1	0	5	0
25	0	2	50.5315	0	0	1	1.4	1	0	1458	41	1	2	PCI	1	1	1	1	0	4.28767	0
26	0	1	73.1699	1	1	1	0.755104	0	0	1506	55	1	3	PCI	1	1	1	1	1	5	0
27	1	1	67.2438	0	0	0	1.49211	1	0	1082	45	1	3	PCI	1	1	1	0	1	5	0
28	0	2	61.4247	1	0	0	1.23468	0	0	248	68	1	3	PCI	1	1	1	1	1	5	0
29	1	1	65.6795	1	0	0	1.3	0	0	450	62	1	3	PCI	1	1	0	1	0	4.43288	0
30	0	1	64.8219	1	0	1	1.02149	0	0	404	29	1	1	PCI	1	1	1	1	0	4.70411	0
31	1	1	57.9452	1	0	1	0.7	0	0	630	67	1	2	PCI	1	1	1	1	1	4.93425	0
32	0	2	70.5425	0	1	0	1	1	0	1080	46	1	3	PCI	1	1	1	0	1	1.71507	1
33	0	2	54.1479	0	1	1	0.8	1	0	1736	30	1	1	PCI	1	0	1	0	0	5	0
34	1	1	43.9562	0	0	1	1.16431	0	0	2562	60	1	3	PCI	1	1	1	1	1	5	0
35	0	2	46.737	0	0	1	0.503935	0	0	694	60	1	1	PCI	1	1	1	1	0	5	0
36	0	2	48.8521	1	0	1	1.12808	0	0	4660	45	1	3	CABG	1	1	1	1	1	5	0
37	0	2	68.6164	1	0	0	1.54132	1	0	476	39	1	3	CABG	1	1	1	1	0	5	0
38	0	2	74.0521	1	1	1	2.20781	0	0	260	45	1	1	PCI	1	0	1	0	0	0.967123	1
39	0	2	65.537	0	0	0	0.571106	0	0	418	60	1	3	PCI	1	1	1	0	1	5	0
40	0	2	61.7123	1	1	1	1.8	1	0	1608	30	1	3	CABG	1	1	1	1	1	5	0
41	1	1	49.4356	0	0	1	1.3682	0	0	1532	63	1	1	PCI	1	1	0	1	0	5	0
42	0	2	75.8849	1	0	1	1.2	0	0	906	30	1	2	PCI	1	0	1	0	1	1.52055	1
43	0	2	59.9781	1	1	1	0.9	1	0	3780	43	1	2	PCI	1	1	1	0	0	5	0
44	1	1	64.3397	0	0	1	0.801932	0	0	430	60	1	1	PCI	1	1	1	1	0	5	0
45	1	1	77.737	1	1	0	1.1	0	0	426	60	1	3	PCI	1	1	1	0	0	5	0
46	0	2	54.6082	0	0	0	1.75368	1	0	3000	62	1	3	CABG	1	1	0	1	0	5	0
47	1	2	78.6192	1	0	0	1.8	1	1	1058	63	1	3	CABG	1	0	1	1	1	1.14247	1
48	0	2	43.3671	0	0	1	0.623072	1	0	4307.25	45	1	2	PCI	1	0	0	0	0	5	0
49	1	1	72.2055	1	1	0	1.6	0	0	520	45	1	1	PCI	1	0	0	1	1	5	0
50	0	2	62.8548	1	0	1	1.19814	0	0	7334	50	1	1	PCI	1	1	1	0	0	5	0
51	1	1	86.4	1	0	0	0.9	0	0	32	45	1	2	conservative	1	1	1	0	1	5	0
52	0	2	63.4904	1	0	1	0.848846	0	0	564	60	1	1	PCI	1	0	1	0	0	1.54247	1
53	0	1	83.5452	0	0	0	1.3	1	0	427.179	39	1	3	PCI	1	0	1	1	1	0.580822	1
54	0	2	54.5233	1	1	1	1.2	0	0	1194	56	1	1	Lysis	1	1	1	1	0	5	0
55	0	1	58.811	1	0	1	1.81763	0	0	4000	30	1	2	PCI	1	1	1	1	1	5	0
56	0	2	77.6493	1	0	0	1.1	1	1	722	45	1	2	PCI	1	1	1	1	1	5	0
57	1	2	88.6027	1	0	0	0.874008	1	0	844	33	1	3	conservative	1	1	1	1	1	3.16438	0
58	0	2	64.6521	0	1	1	1.8	0	0	2568	27	1	3	PCI	1	1	1	1	1	0.227397	1
59	1	1	77.4466	1	1	0	0.8	0	1	420	45	1	2	PCI	1	1	1	1	0	5	0
60	0	2	62.2137	0	0	1	1.19466	0	0	1351.5	70	1	1	PCI	1	1	1	1	0	5	0
61	1	2	75.137	0	1	0	0.915159	0	0	1662	78	1	2	conservative	1	1	1	1	0	5	0
62	0	2	67.1699	1	0	0	1.799	0	0	616	62	1	2	PCI	1	1	1	0	1	3.65479	1
63	1	1	54.1562	1	0	1	1.17444	0	0	5770	47	1	2	PCI	1	1	1	1	1	5	0
64	1	1	83.5178	1	0	0	0.7	0	0	2040	69	1	1	PCI	1	1	1	1	0	5	0
65	0	1	55.0904	0	0	1	0.60401	0	0	2650	59	1	2	PCI	1	1	1	0	0	5	0
66	0	2	57.4192	0	0	1	1.01428	0	0	462	60	1	1	PCI	1	1	1	1	0	5	0
67	1	1	46.6822	1	0	0	1.61151	0	0	400	60	1	3	PCI	1	1	1	1	0	5	0
68	0	2	65.9014	1	0	1	0.573322	0	0	960	60	1	2	PCI	1	0	1	0	0	5	0
69	1	2	54.2356	1	0	1	1.22423	0	0	200	84	1	0	conservative	1	1	1	1	0	5	0
70	1	2	85.5562	1	0	0	0.9	1	0	342	34	1	3	PCI	1	1	1	0	0	5	0
71	0	2	54.3753	0	0	1	0.876698	0	0	188	45	1	3	CABG	1	1	1	1	0	5	0
72	0	1	55.0493	1	0	0	1.43493	0	0	1064	49	1	3	PCI	1	1	1	1	1	5	0
73	1	2	69.063	1	0	0	0.720222	1	0	602	36	1	3	CABG	1	0	1	0	1	5	0
74	1	1	70.3123	1	0	1	0.979265	0	0	646	70	1	2	PCI	1	1	1	1	0	5	0
75	0	1	71.3507	1	1	1	1.44734	0	0	2034	47	1	3	PCI	1	1	1	0	1	5	0
76	1	1	58.2685	1	0	0	1.61914	0	0	210	60	1	1	PCI	1	1	1	0	0	5	0
77	0	2	76.9753	1	0	1	1.9	0	0	1210	62	1	3	CABG	1	1	0	0	1	5	0
78	0	1	51.8932	0	0	1	0.989134	0	0	1724	75	1	1	PCI	1	1	1	0	0	5	0
79	0	2	80.9644	0	0	1	1.1	0	0	754	69	1	2	PCI	1	0	1	1	1	4.19452	1
80	0	1	63.5205	0	0	0	1.75336	0	0	292	74	1	1	PCI	1	0	1	1	1	5	0
81	1	1	63.6438	1	0	0	1.04276	0	0	500	58	1	2	PCI	1	1	1	1	1	5	0
82	0	2	59.7068	0	1	1	0.8	0	0	780	69	1	1	PCI	1	1	1	0	0	5	0
83	0	2	54.5315	0	0	1	1.20748	0	0	742.677	64	1	2	PCI	1	1	1	1	0	5	0
84	0	2	45.5397	0	0	1	1.78089	0	0	1650	56	1	2	PCI	1	1	1	1	0	5	0
85	0	1	59.3808	0	0	1	0.952978	0	0	1200	60	1	2	PCI	1	1	1	1	0	5	0
86	1	2	78.7836	1	0	0	0.8	1	0	268	44	1	3	CABG	1	1	1	0	1	5	0
87	1	1	71.5671	1	0	0	1.68956	0	0	1340	47	1	1	PCI	1	1	1	0	1	5	0
88	0	1	73.3479	1	0	0	1.79654	0	0	854	52	1	3	PCI	1	0	1	0	1	2.4274	1
89	0	1	69.2274	0	0	1	1.42337	0	0	3144	44	1	3	PCI	1	1	0	0	0	2.60274	1
90	0	2	55.2877	1	0	1	1.13068	0	0	2338	58	1	1	PCI	1	0	1	1	1	5	0
91	1	1	75.4685	1	1	0	0.760754	0	0	790	72	1	3	PCI	1	0	1	0	0	5	0
92	0	2	48.3233	0	0	1	0.86219	0	0	1810	65	1	1	PCI	1	1	1	1	0	5	0
93	0	1	53.4904	0	0	1	0.771301	1	0	210	60	1	1	PCI	1	1	0	1	0	4.23014	0
94	0	2	57.0877	0	0	1	1.0442	0	0	870	43	1	1	PCI	1	1	1	1	0	5	0
95	1	1	60.5534	0	1	0	0.9	0	0	2648	45	1	2	PCI	1	1	1	1	1	5	0
96	1	1	56.1178	0	0	1	1.50689	0	0	714	60	1	2	PCI	1	0	0	1	1	5	0
97	0	1	69.3452	0	0	0	0.741514	0	0	540	65	1	1	PCI	1	1	1	0	1	5	0
98	0	2	50.7041	1	1	0	0.8	1	0	2556	45	1	3	PCI	1	1	0	1	1	5	0
99	0	2	50.9205	1	0	1	1.23267	0	0	1844	75	1	1	PCI	1	1	1	0	0	5	0
100	0	2	68.6274	1	0	1	0.716538	0	0	2712	78	1	3	PCI	1	0	1	1	0	5	0
101	1	1	45.1781	0	0	1	1.16811	1	0	1028	37	1	1	PCI	1	1	1	1	1	5	0
102	1	1	72.7973	1	1	0	1.24585	0	0	5460	60	1	3	PCI	1	1	1	1	0	2.27123	1
103	0	2	58.3808	1	0	0	0.957498	0	0	350	61	1	2	PCI	1	0	1	1	0	5	0
104	0	2	51.5205	0	0	1	1.53113	0	0	660	62	1	2	PCI	1	1	1	0	1	5	0
105	1	1	83.1644	1	0	0	1	0	0	1002	56	1	2	PCI	1	1	1	0	1	0.550685	1
106	0	2	49.5589	1	0	1	1.2884	0	0	580	68	1	1	PCI	1	1	1	1	0	5	0
107	0	1	58.9699	0	0	0	1.12003	0	0	2280	70	1	1	PCI	1	1	1	1	0	5	0
108	0	2	70.1205	0	0	0	1.50614	0	0	4316	21	1	1	PCI	1	1	1	0	0	3.35068	1
109	1	2	80.0822	0	1	0	1.6	0	1	5474	30	1	3	PCI	1	1	0	0	1	0.120548	1
110	0	2	46.9836	1	0	1	0.616648	0	0	2978	68	1	2	PCI	1	1	1	1	1	5	0
111	0	2	82.0849	1	0	1	0.9	0	0	1286	60	1	2	PCI	1	1	1	1	0	5	0
112	0	2	51.9123	1	0	0	1.12652	0	0	1154	55	1	3	PCI	1	1	1	1	0	5	0
113	1	1	54.3644	1	1	0	0.6	0	0	400	62	1	3	PCI	1	1	1	1	0	4.40822	0
114	0	2	46.8849	1	0	1	1.70984	1	0	362	42	1	3	PCI	1	1	1	1	1	5	0
115	1	1	63.8082	0	1	0	0.923401	0	0	346	41	1	3	PCI	1	1	1	0	1	3.45205	1
116	0	2	70.2685	1	0	1	1.66042	0	0	218	51	1	2	PCI	1	1	1	1	1	5	0
117	0	2	49.4164	0	0	1	0.954617	0	0	2387.18	60	1	1	PCI	1	1	0	1	0	5	0
118	0	1	58.6438	0	0	1	1.28188	0	0	518	60	1	1	PCI	1	1	0	1	0	5	0
119	0	2	79.9342	1	0	0	2.2	1	0	668	60	1	3	PCI	1	1	0	1	0	5	0
120	0	2	74.4027	0	0	0	1.72504	0	0	540	60	1	2	PCI	1	1	1	1	0	5	0
121	0	2	51.8055	1	1	0	1.65491	0	0	954	60	1	1	PCI	1	1	0	0	0	0.309589	1
122	1	1	80.6247	1	0	0	0.8	0	0	1968	60	1	3	PCI	1	1	1	1	0	3.92877	1
123	0	2	59.8466	0	0	1	1.41595	0	0	212	56	1	2	PCI	1	1	0	1	0	5	0
124	1	1	67.7123	1	1	0	0.8	0	0	82	55	1	3	CABG	1	1	1	1	0	5	0
125	0	2	55.6904	1	1	0	1.6	0	0	1434	56	1	3	PCI	1	1	1	1	0	5	0
126	0	2	44.7945	1	0	1	1.2586	0	0	5400	44	1	3	PCI	1	1	1	1	0	5	0
127	0	2	49.6301	1	0	1	1.28467	0	0	2560	63	1	1	PCI	1	1	1	0	0	5	0
128	0	2	57.989	1	0	0	1.29459	0	0	286	68	1	1	PCI	1	1	1	1	0	5	0
129	0	1	58	1	0	0	2.62359	0	0	1004	61	1	3	PCI	1	1	1	1	1	5	0
130	0	2	57.8521	1	0	1	1.15637	1	0	972	50	1	2	PCI	1	1	1	1	0	5	0
131	0	1	67.3562	0	0	0	0.799599	0	1	572	56	1	2	PCI	1	1	1	1	0	2.96164	1
132	1	1	66.3753	1	1	0	0.884897	0	0	626	40	1	3	PCI	1	1	1	1	0	5	0
133	0	2	56.926	1	0	1	0.849533	0	0	1000	63	1	1	PCI	1	1	1	1	0	5	0
134	0	2	35.4904	1	0	0	1.28893	0	0	6750	36	1	1	PCI	1	0	1	0	1	5	0
135	0	2	50.7288	0	0	1	0.685774	0	0	954	60	1	3	PCI	1	1	1	1	0	5	0
136	0	2	82.9616	0	0	0	1.4	0	0	1456	72	1	3	PCI	1	0	1	1	1	5	0
137	0	2	79.0274	1	1	1	1.3	1	1	434	51	1	3	PCI	1	1	1	1	1	1.1589	1
138	0	2	58.7699	1	0	0	0.873218	0	0	2012	42	1	1	PCI	1	1	1	0	1	5	0
139	0	2	49.2849	1	0	1	0.559019	0	0	536	74	1	1	PCI	1	1	1	1	1	5	0
140	1	1	81.726	1	0	0	1.2	0	0	432	55	1	3	PCI	1	1	1	0	1	5	0
141	0	2	70.0438	0	0	0	1.35561	0	0	590	50	1	3	PCI	1	1	1	1	0	5	0
142	1	1	68.074	1	0	0	1.65223	0	0	2142	49	1	1	conservative	1	1	1	0	1	5	0
143	0	2	43.5178	0	1	1	0.9	0	0	1768	52	1	3	PCI	1	1	1	1	0	5	0
144	0	2	34.5397	0	0	1	1.29345	0	0	1136	48	1	1	PCI	1	1	0	1	0	2.89863	1
145	0	2	52.5836	0	0	1	1.64807	0	0	4766	39	1	1	PCI	1	1	1	1	1	5	0
146	0	1	76.0192	1	0	0	0.9	1	0	1270	45	1	2	conservative	1	1	1	1	0	5	0
147	0	2	63.0575	1	0	1	0.607689	0	0	2520	65	1	3	PCI	1	1	1	1	1	5	0
148	0	2	57.9123	0	0	0	0.831218	0	0	154	78	1	1	PCI	1	1	0	1	0	5	0
149	0	2	58.7644	1	0	0	1.2381	0	0	1784	65	1	1	PCI	1	1	0	1	0	5	0
150	0	2	52.5973	0	0	1	1.16252	0	0	558	74	1	3	PCI	1	1	0	1	0	5	0
151	0	1	62.1041	1	0	0	1.36481	0	0	4000	63	1	1	PCI	1	1	1	0	0	5	0
152	0	2	56.6877	0	0	1	0.87908	0	0	312	64	1	2	PCI	1	1	1	1	0	5	0
153	0	2	55.3507	0	0	1	1.10766	0	0	258	77	1	2	PCI	1	1	1	1	0	5	0
154	0	2	57.8247	0	0	0	0.973813	0	0	868	66	1	1	PCI	1	1	1	1	0	5	0
155	1	1	69.7753	0	0	1	1.10846	0	0	1342	60	1	1	PCI	1	1	1	1	0	5	0
156	0	2	68.4384	0	0	1	1.57065	1	0	14258	53	1	3	PCI	1	1	1	1	1	5	0
157	1	2	57.5808	0	1	0	0.927545	0	1	2228.22	45	1	3	PCI	1	1	0	0	0	0.320548	1
158	1	1	70.8521	1	0	0	0.839802	0	0	108	60	1	1	PCI	1	1	1	1	0	5	0
159	0	1	65.2055	0	0	1	0.658796	0	0	1096	56	1	1	PCI	1	1	1	1	1	2.29315	0
160	0	1	70.8411	1	0	0	1.5022	0	0	548	45	1	3	conservative	1	1	1	1	0	1.63562	1
161	0	2	55.211	0	0	0	1.5938	0	0	514	67	1	1	PCI	1	1	1	1	0	5	0
162	0	2	55.2411	0	0	1	0.718081	0	0	1620	60	1	1	PCI	1	1	1	0	0	5	0
163	0	2	66.2	0	0	1	0.924313	0	0	11960	45	1	2	PCI	1	1	1	0	1	4.78904	1
164	0	2	62.3808	0	0	1	0.951818	0	0	1740	59	1	3	PCI	1	1	1	1	1	5	0
165	0	2	57.326	1	0	1	0.656807	0	0	886	56	1	1	PCI	1	1	0	1	0	5	0
166	0	2	65.0959	1	0	1	1.3	0	0	730	60	1	2	PCI	1	0	0	1	0	5	0
167	0	2	50.1589	1	0	1	1.2578	1	0	2794	54	1	2	PCI	1	1	1	0	1	5	0
168	0	2	52.9534	0	0	1	0.892901	0	0	364	57	1	1	PCI	1	1	1	0	0	3.91233	0
169	1	2	60.7288	0	0	1	0.521339	0	0	584	81	1	2	PCI	1	1	1	1	1	1.35616	1
170	0	2	74.6438	1	0	1	1.46756	0	0	1804	57	1	3	PCI	1	1	1	1	0	1.12603	1
171	0	2	50.3644	1	0	1	1.1861	1	0	666	50	1	3	PCI	1	1	0	1	1	0.660274	1
172	0	2	42.8329	0	0	0	1.8	1	0	300	22	1	3	PCI	1	1	1	1	1	0.534247	1
173	0	2	60.6795	1	0	1	0.64747	1	0	236	61	1	2	PCI	1	1	1	1	0	5	0
174	0	2	45.2548	0	0	1	1.25677	0	0	3900	51	1	1	PCI	1	1	1	1	1	5	0
175	1	1	69.5014	1	1	0	0.7	0	0	388	35	1	3	PCI	1	1	1	0	1	5	0
176	0	1	65.6137	1	1	0	1.7	0	0	4056.44	58	1	2	PCI	1	1	1	0	0	5	0
177	0	2	45.9096	1	0	1	0.664935	0	0	4000	30	1	1	PCI	1	1	1	1	0	5	0
178	0	1	75.5233	1	0	0	0.873752	0	0	2660	64	1	3	PCI	1	1	1	1	0	5	0
179	0	1	74.526	1	0	0	0.724783	0	0	400	60	1	1	PCI	1	1	1	1	0	5	0
180	0	2	64.8849	0	1	1	0.9	1	0	234	60	1	3	PCI	1	1	1	1	0	5	0
181	0	2	57.6575	1	0	1	1.38931	1	0	374	70	1	1	PCI	1	1	1	1	0	5	0
182	1	1	40.5863	1	0	1	0.611252	0	0	1530	64	1	1	PCI	1	1	1	1	0	5	0
183	0	2	30.1342	0	0	0	1.50913	0	0	4830	41	1	1	PCI	1	1	1	1	0	5	0
184	0	2	63.9507	1	0	0	1.81363	0	1	688	60	1	3	PCI	1	1	1	1	1	5	0
185	0	1	59.0082	1	0	0	1.50225	1	0	1140	55	1	2	PCI	1	1	1	1	0	3.72877	1
186	0	2	55.6027	0	0	1	1.52892	0	1	2166	28	1	1	PCI	1	1	1	1	1	1.65479	1
187	0	1	67.9534	1	0	0	1.65361	0	0	592	40	1	3	PCI	1	1	1	1	1	5	0
188	0	2	60.6493	1	0	0	0.798673	0	0	960	64	1	1	PCI	1	1	1	0	0	5	0
189	0	2	54.4712	0	0	1	1.3963	0	0	520	54	1	2	PCI	1	1	1	0	1	5	0
190	0	1	68.9233	0	0	0	0.806122	0	0	594	53	1	2	PCI	1	0	0	0	1	5	0
191	0	2	49.5096	1	0	0	1.20821	0	0	144	69	1	3	PCI	1	1	0	1	0	5	0
192	1	2	78.6	0	0	0	1.2	0	0	220	33	1	2	conservative	1	1	0	0	1	2.78904	1
193	0	2	56.7288	0	0	1	0.849375	0	0	8968	21	1	1	PCI	1	1	1	1	1	5	0
194	0	2	41.7973	0	0	0	0.928048	0	0	670	62	1	1	PCI	1	1	1	1	0	4.71233	0
195	0	2	61.2192	1	0	1	0.941591	0	0	264	60	1	2	PCI	1	1	1	0	0	5	0
196	0	2	70.9836	1	1	1	1.7204	0	0	632	60	1	3	PCI	1	0	0	0	0	5	0
197	0	2	41.8932	0	0	1	1.50044	0	0	2016	64	1	0	PCI	1	1	0	1	0	5	0
198	0	2	59	0	0	1	0.61893	0	0	306	45	1	2	PCI	1	1	1	0	1	5	0
199	1	1	71.0767	0	0	0	1.64197	0	0	1740	58	1	3	PCI	1	1	1	0	0	5	0
200	0	2	69.8274	1	0	1	1.02447	0	0	2102	45	1	3	PCI	1	1	0	0	1	4.69589	1
201	0	1	59.189	0	0	0	1.6723	1	0	746	56	1	1	PCI	1	0	1	0	0	5	0
202	0	2	53.9918	0	0	1	1.1347	0	0	1414	45	1	3	PCI	1	1	1	1	1	5	0
203	0	2	60.0658	0	0	0	1.19654	0	0	2932	67	1	1	PCI	1	1	1	1	0	5	0
204	0	2	61.611	0	0	1	1.67122	0	0	566	77	1	2	PCI	1	1	1	1	0	5	0
205	0	2	53.8438	0	0	0	0.663645	0	0	462	64	1	1	PCI	1	1	1	1	0	5	0
206	0	2	56.1699	0	0	1	1.21644	0	0	784	62	1	3	PCI	1	1	1	1	0	5	0
207	1	1	70.1671	1	0	0	1.15437	1	0	566	50	1	1	PCI	1	1	1	1	0	5	0
208	0	2	65.3507	1	0	1	0.559133	1	0	350	62	1	2	PCI	1	1	1	1	0	5	0
209	0	1	66.9808	1	0	0	1.34106	0	0	404	41	1	3	CABG	1	1	1	1	1	5	0
210	0	1	47.3342	1	0	0	1.1	0	0	1196	55	1	3	PCI	1	1	1	1	0	1.56986	0
211	0	2	53.9616	0	0	0	1.81468	0	0	2618	55	1	1	PCI	1	1	1	1	0	5	0
212	0	2	69.4685	1	0	0	1.3	1	0	2407.43	35	1	3	PCI	1	1	1	1	1	5	0
213	0	2	53.0082	0	0	1	0.8	1	0	2161	36	1	1	PCI	1	1	1	1	0	1.50137	0
214	0	1	70.0055	1	1	0	1.5	1	0	490	58	1	0	PCI	1	1	1	1	0	5	0
215	0	2	65.4466	1	0	0	1.29897	0	0	2850	25	1	2	PCI	1	1	1	1	1	5	0
216	1	1	73.0603	1	1	0	4.7	1	0	826	34	1	3	PCI	1	0	1	1	1	0.709589	1
217	0	1	66.1096	1	0	0	1.2	0	0	3114	38	1	2	PCI	1	1	1	1	1	1.34795	0
218	0	2	58.7589	0	0	0	1	1	0	407	20	1	3	PCI	1	1	1	1	1	1.7589	0
219	0	1	62.9315	1	0	1	1.57446	0	0	242	35	1	3	PCI	1	1	1	1	1	5	0
220	0	1	69.7178	1	0	1	1.36343	1	0	2008	50	1	3	PCI	1	1	1	1	1	5	0
221	0	2	67.7644	1	0	0	1.29538	1	1	492	40	1	3	PCI	1	1	1	0	1	5	0
222	1	1	67.7178	1	1	0	1	0	0	328	45	1	2	PCI	1	1	1	0	1	0.249315	1
223	1	1	64.7863	1	0	0	1.26777	0	0	560	52	1	1	PCI	1	1	1	0	0	5	0
224	1	1	69.3973	1	0	0	1.40718	0	0	1504	66	1	3	PCI	1	1	1	0	1	5	0
225	0	1	76.3452	1	0	0	1.2	0	0	460	60	1	2	PCI	1	1	1	0	1	5	0
226	1	1	64.0685	0	1	0	0.76607	0	0	922	60	1	1	PCI	1	1	1	1	0	5	0
227	0	1	64.0384	0	0	1	1.91747	0	0	500	60	1	2	PCI	1	1	1	1	0	4.71781	0
228	0	2	50.4685	1	0	1	0.995634	0	0	432	70	1	1	PCI	1	1	0	1	0	5	0
229	0	2	55.2274	1	0	0	1.2589	0	0	606	40	1	1	PCI	1	1	1	0	1	5	0
230	0	2	95.126	0	0	0	1.1	1	0	752	60	1	3	PCI	1	0	1	0	1	0.265753	1
231	0	1	59.7014	1	0	1	0.936459	0	0	390	60	1	3	PCI	1	1	1	1	1	5	0
232	0	2	54.6301	1	0	0	0.735361	0	0	4774	49	1	3	PCI	1	1	1	1	1	5	0
233	1	1	69.611	0	0	1	0.822474	0	0	840	67	1	1	PCI	1	1	1	1	1	4.74795	1
234	0	2	61.326	0	0	1	1.53455	0	0	1754	60	1	1	PCI	1	1	1	1	0	5	0
235	1	1	54.0822	0	0	1	1.62359	1	0	510	61	1	1	PCI	1	1	0	1	0	5	0
236	1	1	54.7041	0	0	0	0.697016	0	0	3816	40	1	3	PCI	1	1	1	1	0	5	0
237	0	1	76.6055	1	0	0	1	0	0	2218	64	1	3	PCI	1	0	1	1	1	5	0
238	1	1	64.7342	1	0	0	0.520552	0	0	1262	60	1	1	PCI	1	1	1	0	0	5	0
239	0	2	49.5753	1	0	0	0.9	1	0	675	57	1	3	PCI	1	1	1	1	0	2.39726	0
240	0	2	61.3397	1	0	1	0.95571	0	0	4420.28	69	1	1	PCI	1	1	1	1	0	5	0
241	1	1	42.4274	1	0	1	1.6507	0	0	900	45	1	1	PCI	1	1	1	1	1	5	0
242	0	2	63.4493	0	0	0	0.964005	0	0	14732	69	1	1	PCI	1	1	1	0	1	5	0
243	0	2	35.8603	0	0	1	0.856969	0	0	2566	60	1	2	PCI	1	1	1	1	0	2.65479	1
244	0	2	46.4164	1	0	1	0.945172	0	0	354	48	1	2	PCI	1	1	1	1	0	5	0
245	0	2	30.3425	0	0	1	0.56911	0	0	564	60	1	2	PCI	1	1	0	1	0	5	0
246	0	2	44.0712	0	0	1	0.969222	0	0	1604	60	1	1	PCI	1	1	1	0	0	5	0
247	0	1	81.389	0	0	0	1.1	0	0	4604	45	1	1	PCI	1	1	0	1	0	5	0
248	0	2	68.2685	0	0	1	0.781684	0	0	572	60	1	2	PCI	1	1	1	1	1	5	0
249	0	2	55.6658	1	0	1	0.872506	0	0	1140	72	1	1	PCI	1	1	1	1	1	5	0
250	0	2	41.5973	1	0	1	0.89369	0	0	250	45	1	1	PCI	1	1	1	0	1	5	0
251	0	1	69.1425	1	0	1	0.866193	0	0	312	76	1	2	PCI	1	1	1	1	0	5	0
252	0	2	57.6137	0	1	1	1.4	0	0	3102	46	1	3	PCI	1	1	1	1	0	5	0
253	1	1	66.5616	0	1	0	1.8	0	0	7616	66	1	1	PCI	1	1	0	1	1	5	0
254	1	1	74.4356	1	0	1	0.875519	0	0	1548	45	1	3	PCI	1	1	1	1	1	5	0
255	0	2	65.2466	1	0	0	2.12566	1	0	490	58	1	1	PCI	1	0	1	1	1	3.72329	1
256	0	1	44.7342	1	0	1	1.13898	0	0	4730	65	1	1	PCI	1	1	1	1	0	5	0
257	1	1	84.5014	1	1	0	1.65739	0	1	3600	37	1	1	PCI	1	1	1	1	1	1.86849	1
258	1	1	58.9507	0	0	0	0.599837	0	0	3104	61	1	3	PCI	1	1	1	0	0	5	0
259	0	2	48.2411	0	0	1	0.656526	0	0	4828	52	1	1	PCI	1	1	0	1	1	5	0
260	0	2	51.5699	0	0	0	0.639854	0	0	4385.97	75	1	1	PCI	1	1	1	1	0	5	0
261	0	2	52.9699	0	0	1	1.59554	0	0	304	68	1	2	PCI	1	1	0	1	0	5	0
262	0	2	55.1233	0	0	0	0.91691	0	0	1896	62	1	3	PCI	1	1	0	1	0	5	0
263	0	2	64.9589	0	0	0	0.950215	0	0	764	88	1	1	PCI	1	1	1	0	0	5	0
264	1	1	36.4849	0	0	1	1.12659	0	0	802	63	1	1	PCI	1	1	1	0	0	5	0
265	0	2	40.6438	1	1	1	1.1	0	0	3376	60	1	2	PCI	1	1	1	1	0	5	0
266	0	2	64.7699	1	0	1	1.36387	0	0	2892	56	1	2	PCI	1	1	1	1	0	5	0
267	1	1	56.9397	1	1	0	1.70467	0	0	600	60	1	1	PCI	1	1	1	0	1	5	0
268	0	2	56.4411	1	1	1	1.20653	0	0	558	60	1	1	PCI	1	1	1	0	0	5	0
269	0	2	54.8219	1	0	1	1.22918	0	0	5360	31	1	2	PCI	1	1	1	1	1	5	0
270	0	1	65.7836	1	0	1	0.608933	0	0	622	64	1	1	PCI	1	1	1	1	0	5	0
271	0	2	39.6822	1	0	1	1.19993	0	0	686	73	1	1	PCI	1	1	1	1	0	5	0
272	0	2	69.7918	1	0	0	0.952729	0	0	660	79	1	2	PCI	1	1	1	1	1	1.49863	1
273	0	2	60.9699	1	0	0	1.47272	0	0	1640	58	1	2	PCI	1	1	1	1	0	5	0
274	0	1	64.6137	1	1	0	0.996908	0	0	358	62	1	3	PCI	1	1	1	0	0	0.271233	1
275	0	2	59.0521	1	0	1	1.79971	0	0	800	71	1	1	PCI	1	1	0	0	0	5	0
276	0	2	50.5178	1	0	1	1.14992	0	0	1706	55	1	1	PCI	1	1	1	1	0	5	0
277	0	2	67.6192	1	0	0	2.18586	1	0	2092	46	1	3	PCI	1	1	1	1	0	4.88219	0
278	0	2	76.3589	0	0	1	2.1	1	0	254	63	1	3	PCI	1	1	1	1	1	5	0
279	0	2	61.3726	1	0	1	1.97802	0	0	1150	73	1	3	PCI	1	1	1	1	1	5	0
280	1	1	33.6493	0	0	1	0.807266	0	0	98	62	1	1	PCI	1	1	0	0	0	5	0
281	0	1	67.5178	0	0	0	1.59864	1	0	1424	54	1	2	PCI	1	1	1	1	1	5	0
282	0	2	58.2247	1	0	1	1.87072	1	0	2330	60	1	3	PCI	1	1	1	1	1	5	0
283	1	1	70.7151	0	1	0	0.527386	0	0	98	60	1	3	PCI	1	1	1	0	0	5	0
284	1	1	50.4192	1	0	1	1.15271	0	0	1878	60	1	2	PCI	1	1	1	1	0	5	0
285	0	2	50.1288	0	0	0	0.820344	0	0	266	60	1	3	PCI	1	1	0	1	1	5	0
286	0	2	55.5671	0	0	1	1.82952	0	0	1820	60	1	1	PCI	1	1	1	0	0	5	0
287	0	1	57.1342	0	0	1	1.44227	0	0	894	79	1	1	PCI	1	1	1	0	0	5	0
288	0	2	44.8932	1	1	0	1.2	1	0	408	45	1	2	PCI	1	1	1	1	0	5	0
289	1	1	78.0329	1	0	0	1	0	0	2654	60	1	2	PCI	1	1	1	0	1	3.38082	1
290	0	1	74.7726	0	1	0	1.5	0	0	2140	40	1	2	PCI	1	0	1	0	1	4.60274	1
291	1	1	72.4164	0	0	0	1.04017	0	0	298	59	1	1	PCI	1	1	1	1	0	5	0
292	0	2	47.6986	1	0	1	0.576488	0	0	4202	41	1	1	PCI	1	1	1	1	0	5	0
293	0	1	68.6767	1	0	0	1.53021	0	0	1642	23	1	3	PCI	1	1	1	1	1	0.230137	1
294	0	1	57.6219	0	0	1	0.93481	0	0	1056	58	1	3	PCI	1	1	1	1	0	5	0
295	0	1	73.3507	1	0	1	1.0986	0	0	710	60	1	3	PCI	1	1	1	1	0	1.28219	1
296	0	2	36.5041	0	0	1	1.12489	0	0	3364	57	1	3	PCI	1	1	1	1	0	5	0
297	0	1	37.8548	0	0	1	0.95997	0	0	4670	56	1	1	PCI	1	1	1	0	0	5	0
298	1	1	50.8027	1	0	0	1.04776	0	0	4513.51	70	1	1	PCI	1	1	1	1	0	5	0
299	0	2	49.389	0	0	1	1.72677	0	0	4256	72	1	1	PCI	1	1	1	1	0	5	0
300	0	2	80.2986	0	0	0	1.1	0	1	1956	48	1	1	PCI	1	0	1	0	1	1.50685	1
301	0	1	75.8986	1	0	0	0.7	0	0	448	45	1	3	PCI	1	1	1	1	1	5	0
302	0	2	43.1041	1	0	0	0.814666	1	0	2310	69	1	1	PCI	1	1	1	1	1	5	0
303	0	2	29.9397	0	0	1	0.585803	0	0	2202	42	1	1	PCI	1	1	1	1	0	5	0
304	0	2	48.463	0	0	1	0.870579	1	0	706	52	1	2	PCI	1	1	1	0	1	5	0
305	0	2	66.7397	1	1	1	1	0	0	1416	60	1	1	PCI	1	1	1	1	0	1.56164	1
306	1	1	79.6904	0	0	1	0.9	0	0	3202	60	1	3	PCI	1	1	1	1	1	5	0
307	0	2	52.4411	1	0	1	1.52064	0	0	1149.12	60	1	3	PCI	1	1	1	0	0	5	0
308	1	2	80.4603	0	1	0	1	0	0	398	61	1	2	PCI	1	1	1	1	0	5	0
309	0	1	66.8712	0	0	1	1.5073	0	0	8000	45	1	1	PCI	1	1	1	0	1	5	0
310	0	1	60.8932	1	0	0	1.37223	0	0	226	74	1	1	PCI	1	1	1	1	0	5	0
311	0	2	54.189	1	0	0	2.01125	0	0	5000	68	1	2	PCI	1	1	1	1	0	5	0
312	0	1	51.3699	0	0	1	1.47428	0	0	664	73	1	2	PCI	1	1	1	1	0	5	0
313	0	2	57.2521	1	0	0	0.926038	1	0	1036	48	1	2	PCI	1	1	1	1	0	5	0
314	0	2	67.7151	0	0	1	0.789894	1	0	1080	61	1	3	PCI	1	1	1	1	0	5	0
315	0	2	63.3973	0	0	0	1.93214	0	0	4224	45	1	1	PCI	1	1	1	1	0	5	0
316	0	2	63.9863	0	0	1	1.32821	0	0	860	76	1	2	PCI	1	1	1	1	0	5	0
317	0	2	74.7342	0	0	1	1.07023	1	0	196	58	1	3	CABG	1	1	1	1	0	5	0
318	0	1	50.8521	0	0	0	1.54032	0	0	840	46	1	1	PCI	1	1	1	1	0	5	0
319	1	2	74.9918	1	1	0	2.3	0	0	2068	21	1	2	PCI	1	1	1	1	1	3.11233	1
320	0	1	74.9562	1	0	1	1.26195	0	0	250	61	1	1	PCI	1	1	1	1	1	1.30959	1
321	0	2	81.2466	1	0	0	1.2	1	0	3972	50	1	3	PCI	1	1	1	0	1	5	0
322	0	2	56.2932	1	0	0	1.05872	0	0	1082	54	1	2	PCI	1	1	1	1	1	5	0
323	0	1	76.8384	1	0	0	1.5	0	0	582	62	1	2	PCI	1	0	1	0	1	5	0
324	0	2	43.8959	0	0	1	1.60592	0	0	4494	45	1	1	PCI	1	1	1	1	0	5	0
325	0	2	54.1562	1	0	1	1.16194	0	0	2776	53	1	1	PCI	1	1	1	0	1	5	0
326	0	2	56.2219	1	0	0	1.08155	0	0	962	66	1	2	PCI	1	0	1	1	0	3.74521	0
327	0	2	36.6247	0	0	1	0.596105	0	0	1082	60	1	3	PCI	1	1	0	1	0	5	0
328	1	1	75.0137	1	0	0	1.09591	0	0	1542	49	1	2	PCI	1	1	1	1	1	5	0
329	0	2	57.9973	0	0	1	1.35089	0	0	226	76	1	1	PCI	1	1	0	1	0	5	0
330	0	2	65.1288	0	0	1	1.11591	1	0	412	77	1	1	PCI	1	1	1	0	0	5	0
331	1	1	72.4137	1	1	0	1.8	0	0	400	60	1	2	PCI	1	1	1	0	1	5	0
332	0	2	50.7014	0	0	1	0.691534	0	0	500	70	1	2	PCI	1	1	0	1	0	5	0
333	1	1	66.811	1	0	0	0.842089	0	0	1044	54	1	3	PCI	1	1	1	1	0	4.29041	0
334	0	2	46.5863	1	0	1	1.8741	0	0	580	69	1	2	PCI	1	1	1	1	0	5	0
335	0	2	74.9425	1	0	1	1.67011	1	0	360	61	1	1	PCI	1	1	1	0	0	5	0
336	0	2	53.1616	1	0	1	0.626504	0	0	696	66	1	3	PCI	1	1	1	1	0	5	0
337	0	2	55.3068	1	0	1	1.57293	0	0	5540	19	1	3	PCI	1	1	1	0	0	5	0
338	1	1	75.3753	1	0	0	1.24575	0	0	1600	45	1	3	PCI	1	1	1	1	1	5	0
339	0	2	39.3452	1	0	1	0.629588	1	0	380	58	1	2	PCI	1	1	1	1	0	5	0
340	1	1	54.6137	1	0	1	1.12437	0	0	702	67	1	3	PCI	1	1	1	1	0	4.28493	0
341	0	2	47.7671	1	0	1	0.734628	0	0	1302	51	1	3	PCI	1	1	1	1	0	2.71507	0
342	0	2	49.9973	0	0	0	1.1	0	0	770	67	1	3	PCI	1	1	0	1	0	4.14795	0
343	1	1	67.674	1	0	0	1	0	0	882	76	1	3	PCI	1	1	1	1	0	4.15616	0
344	1	1	87.7315	1	1	0	0.715049	0	0	1462	39	1	3	PCI	1	1	1	1	1	3.87671	0
345	0	2	55.7397	1	1	1	1.1	0	0	100	39	1	1	PCI	1	1	1	1	1	5	0
346	0	2	54.1178	0	0	0	1	1	0	1768	73	1	2	PCI	1	1	1	1	0	5	0
347	0	1	71.8027	0	0	0	1.3	0	0	1468	69	1	1	PCI	1	1	1	1	0	4.50137	0
348	0	2	40.7562	1	0	1	1.5	0	0	296	86	1	2	Lysis	1	0	1	1	0	4.35068	0
349	1	1	74.9151	1	0	0	0.7	0	0	614	60	1	2	PCI	1	1	1	1	0	4.09863	0
350	1	1	67.874	1	0	0	0.7	0	0	280	69	1	1	PCI	1	1	1	1	0	4.11233	0
351	1	1	79.7534	1	0	0	0.7	0	0	1010	65	1	3	PCI	1	1	1	1	0	4.27123	0
352	0	1	66.863	1	0	1	1.4	0	0	4326	63	1	2	PCI	1	1	1	1	1	4.09589	0
353	0	1	63.4658	0	0	0	0.748671	0	0	166	37	1	3	PCI	0	0	0	0	0	5	0
354	1	2	88.9808	0	1	0	0.7	0	0	860	69	1	2	PCI	1	1	1	1	0	3.7726	0
355	0	1	64.2767	1	0	1	1.1	0	0	872	42	1	3	PCI	1	1	1	1	1	4.22192	0
356	0	2	60.5753	1	1	1	1.2	0	0	2280	57	1	0	Lysis	1	1	1	1	1	3.7589	0
357	0	2	60.1589	1	0	0	1.3	0	0	574	58	1	3	PCI	1	1	1	1	1	4.0137	0
358	0	2	79.6219	0	1	0	1.23241	0	0	340	19	1	3	conservative	0	1	1	1	1	3.03014	0
359	0	2	88.3644	1	0	0	1.8	1	1	3172	31	1	0	PCI	0	1	0	0	0	4.05479	0
360	0	2	54.1452	0	1	1	1.2	0	0	3402	67	1	2	Lysis	1	1	1	1	0	4.21918	0
361	0	2	50.3123	1	0	0	1	0	0	3360	56	1	1	PCI	1	1	1	1	0	4.02192	0
362	0	1	73.3945	1	0	1	1	0	0	2094	69	1	2	PCI	1	1	1	1	1	3.70137	0
363	0	2	46.2164	0	0	1	1.3	0	0	582	66	1	1	PCI	1	1	1	1	0	3.20548	0
364	1	1	80.1233	1	0	0	1.8	1	0	154	44	1	3	PCI	1	1	1	0	1	3.69315	0
365	0	2	41.3973	1	0	1	0.9	1	0	1648	69	1	0	PCI	1	1	1	1	0	5	0
366	1	1	57.1699	1	0	0	0.7	0	0	2400	59	1	2	PCI	1	1	1	1	0	5	0
367	0	2	76.0932	1	1	1	1.7	0	0	592	48	1	1	PCI	1	1	1	1	1	0.624658	1
368	0	2	47.9315	0	0	1	1	0	0	1608	77	1	2	PCI	1	1	1	1	0	4.75068	0
369	0	2	70.3014	1	0	1	1.5	0	0	1188	55	1	2	PCI	1	1	1	1	1	2.25479	1
370	0	2	60.9753	1	0	1	1	0	0	1224	65	1	2	PCI	1	1	1	1	0	4.15068	0
371	0	2	59.0548	0	0	0	3	0	0	8718	57	1	2	PCI	1	1	1	1	1	3.54795	0
372	0	2	42.1014	0	0	1	2.09	0	0	1456	64	1	1	PCI	1	1	1	1	0	4.89589	0
373	0	2	58.937	0	0	0	1	0	0	1940.26	57	1	1	PCI	0	0	0	0	0	5	0
374	0	2	64.6301	1	0	0	1.11783	0	0	798	69	1	1	PCI	1	1	1	1	0	5	0
375	0	2	45.1342	0	0	1	0.89559	0	0	348	64	1	3	PCI	1	1	1	1	0	5	0
376	1	2	78.8192	1	0	0	0.9	1	0	212	67	1	3	PCI	1	1	1	1	1	4.58356	0
377	0	1	56.7205	0	0	1	1.071	0	0	4590	68	1	1	PCI	1	1	1	1	1	5	0
378	0	2	59.526	0	0	0	1.29003	1	0	13576	17	1	1	PCI	1	1	1	0	1	4.67945	0
379	1	2	69.7507	0	1	0	1.47975	1	0	608	10	1	3	conservative	1	0	0	0	1	0.364384	1
380	1	2	59.9479	1	0	0	1.78306	0	0	310	53	1	0	conservative	1	1	1	0	0	5	0
381	0	2	53.6274	0	0	1	1	0	0	3932	56	1	1	PCI	1	1	1	1	0	3.9726	0
382	1	1	64.8438	0	0	0	0.8	0	0	3590.88	69	1	0	conservative	0	0	0	0	0	4.8274	0
383	0	1	61.0575	0	0	0	1	0	0	53.1655	50	1	0	PCI	0	0	0	0	0	4.76712	0
384	0	2	78.4767	1	0	0	2.4	1	0	7598	25	1	3	PCI	0	0	0	0	0	0.375342	1
385	0	1	70.1753	1	0	0	1	0	0	532	59	1	0	PCI	1	1	1	1	0	4.0274	0
386	0	2	53.1644	1	0	0	1.2	0	0	1456	68	1	1	PCI	1	1	1	1	0	4.03562	0
387	1	1	44.9014	0	0	1	0.5	0	0	376	62	1	1	PCI	1	1	1	0	0	3.46849	0
388	0	2	77.4548	1	1	1	1.65791	0	1	664	52	1	3	PCI	1	1	1	1	0	2.43836	0
389	0	1	58.7808	0	0	1	0.8	1	0	1404	57	1	2	PCI	1	1	1	1	0	4.24658	0
390	1	1	75.211	1	1	1	1.2	0	1	4906	37	1	3	PCI	1	1	1	1	1	3.54521	0
391	0	2	63.6904	1	0	1	1.1	0	0	336	45	1	3	PCI	1	1	1	1	0	3.92877	0
392	1	1	67.1123	1	0	0	0.9	0	0	3080	44	1	3	PCI	1	1	1	1	0	4.04384	0
393	0	2	56.7178	1	0	0	1.2	0	0	3020	59	1	1	PCI	1	1	1	1	0	3.86301	0
394	0	2	74.1096	0	0	1	1.2	0	0	1590	55	1	3	PCI	1	1	1	1	1	3.90411	0
395	0	2	47.6329	1	0	1	1	0	0	1318	61	1	1	PCI	1	1	1	1	0	5	0
396	0	2	73.2575	1	0	1	1.2	0	0	1066	36	1	1	PCI	1	1	1	1	1	3.23014	1
397	0	2	71.3068	0	0	1	1.1	0	0	584	62	1	3	PCI	1	1	1	1	0	5	0
398	0	2	72.6411	1	0	1	1.2	0	0	1662	55	1	3	PCI	0	0	0	0	0	5	0
399	0	2	72.8795	0	0	0	0.8	0	0	2338.38	64	1	0	PCI	0	0	0	0	0	0.0465753	0
400	0	2	60.3945	1	0	0	0.9	0	0	1478	57	1	2	PCI	1	1	1	1	1	3.79726	0
401	0	2	73.7534	1	0	0	0.8	0	1	432	65	1	2	PCI	1	1	1	1	0	4.81918	0
402	0	2	42.5397	1	1	1	3	0	0	5330	43	1	2	PCI	1	1	1	1	1	2.71781	0
403	0	1	57.1699	0	0	1	1.2	0	0	2816	59	1	1	PCI	1	1	1	1	1	3.95068	0
404	1	1	52.4575	1	0	0	0.8	0	0	664	45	1	3	PCI	1	1	1	1	1	3.44658	0
405	0	2	58.3945	1	0	1	1.8	0	0	1054	34	1	3	conservative	1	1	1	1	1	1.17534	1
406	0	1	67.6027	1	1	0	2.20316	0	0	552	46	1	2	PCI	1	1	1	1	1	0.10411	1
407	0	2	59.4	1	0	0	1.6	0	0	1912	51	1	1	PCI	1	1	1	1	1	3.81096	0
408	0	1	78.9507	1	0	0	1	0	0	1520	48	1	3	PCI	1	1	1	1	1	3.91233	0
409	0	2	59.1288	0	0	1	1.1	0	0	1760	50	1	0	PCI	1	1	1	1	0	5	0
410	0	2	24.8521	1	0	1	0.624013	0	0	3000	45	1	2	PCI	1	1	1	1	1	5	0
411	0	1	68.1123	1	0	1	1	0	0	1318	68	1	3	PCI	1	1	1	1	1	3.34247	0
412	0	2	86.2548	0	0	1	1.4	0	0	3966	46	1	2	PCI	1	1	1	1	1	3.05205	1
413	0	2	44.3699	0	0	0	1.1	0	0	1862	45	1	1	PCI	1	1	1	1	1	3.73699	0
414	0	2	72.3726	1	0	1	1.4	0	0	1476	61	1	2	PCI	0	0	0	0	0	3.7589	0
415	1	1	82.6329	1	0	0	1.1	0	0	1466	29	1	2	PCI	1	1	0	1	1	0.090411	1
416	0	2	51.4904	0	0	0	1.1	0	0	3130	49	1	0	PCI	0	0	0	0	0	4.04384	0
417	0	2	84.937	1	0	0	1.09631	1	1	540	43	1	1	conservative	1	1	1	1	1	3.48767	0
418	0	1	60.1589	1	0	0	1.2	0	0	602	47	1	3	PCI	1	1	1	1	0	4.00548	0
419	0	2	37.6164	0	0	1	1.2	0	0	5548	59	1	1	PCI	1	1	1	1	0	3.35342	0
420	1	1	45.1342	1	0	1	0.7	0	0	56	63	1	1	PCI	1	1	0	1	0	3.4137	0
421	0	2	66.1973	1	0	1	1.4	0	0	2554	27	1	3	PCI	1	1	1	1	0	3.8411	0
422	1	1	77.6082	1	0	0	1.54462	0	0	1440	57	1	2	PCI	1	1	1	1	1	3.67945	0
423	0	2	60.9288	1	0	0	1.1	0	0	1588	54	1	3	PCI	1	1	1	1	1	3.80548	0
424	1	1	33.2959	0	0	1	0.7	0	0	7818	19	1	2	PCI	0	1	1	1	0	0.347945	1
425	0	1	72.9096	1	1	0	0.7	0	0	3706	38	1	2	PCI	1	1	1	1	1	1.27123	1
426	0	2	55.4493	1	0	0	1	0	0	5950	27	1	2	PCI	1	1	1	1	1	5	0
427	0	1	79.2	1	1	0	1.7	0	0	2926	51	1	3	PCI	1	1	1	1	1	3.93699	0
428	0	1	73.6849	1	0	0	1.5	0	0	1498	47	1	3	PCI	1	1	1	1	0	3.4	0
429	0	2	75.011	0	0	1	1.2	0	0	2528	32	1	3	PCI	1	1	1	1	1	5	0
430	0	1	81.4986	1	1	0	1.3	0	1	1928	42	1	1	PCI	1	1	1	1	1	3.43014	0
431	0	2	51.3452	1	0	1	1.1	0	0	1600	30	1	2	PCI	1	1	1	1	1	3.31233	0
432	1	1	84.7644	0	0	0	0.9	0	0	492	56	1	2	PCI	1	1	1	1	0	4.01096	1
433	0	2	64.7123	0	1	0	1.2	0	0	208	77	1	2	PCI	1	1	1	1	0	5	0
434	0	2	65.3151	1	0	1	1.3	0	0	820	48	1	3	PCI	1	1	1	1	1	1.89041	1
435	1	1	82.0219	0	1	0	1	0	0	2040	51	1	1	PCI	1	1	1	1	1	0.624658	1
436	1	2	85.1808	1	0	0	1.5	0	1	488	65	1	3	PCI	1	1	1	1	0	3.28767	0
437	0	1	67.1781	1	1	0	0.976786	0	0	1102	36	0	3	conservative	1	1	1	1	1	1.24658	1
438	1	1	75.3425	0	0	0	1.1	0	1	1356	31	1	3	PCI	1	1	1	1	1	0.126027	1
439	1	2	89.1151	1	0	0	1.2	0	1	826	51	1	2	PCI	1	1	1	1	1	0.115068	1
440	0	1	58.474	1	0	0	1.2	0	0	248	65	1	1	PCI	1	1	1	1	0	4.61096	0
441	0	2	64.3699	1	1	1	1.3	0	0	6366	35	1	3	PCI	1	1	1	1	1	0.805479	1
442	0	2	57.5753	1	0	1	1	1	0	240	52	1	3	PCI	1	1	1	1	0	3.44658	0
443	0	1	61.8712	1	0	1	1.7	0	0	11876	41	1	1	PCI	1	1	1	1	1	0.317808	1
444	0	2	71.4849	1	1	0	0.9	0	1	1196	30	1	1	PCI	1	1	1	1	1	3.53973	0
445	1	2	78.2849	1	0	0	1.5	0	0	9138	14	1	1	PCI	1	1	1	1	1	0.830137	1
446	0	2	63.0438	0	0	0	1.1	0	0	3772	47	1	1	PCI	1	1	1	1	1	5	0
447	1	1	84.1479	1	0	0	0.9	0	0	1058	60	1	3	PCI	1	1	1	1	1	3.50959	0
448	0	2	56.337	0	0	1	0.9	0	0	4236	44	1	1	PCI	1	1	1	1	0	3.52877	0
449	0	2	47.9644	0	0	1	0.9	0	0	2624	69	1	1	PCI	1	1	1	1	0	3.61918	0
450	0	2	71.274	1	0	1	1.2	1	0	544	70	1	3	PCI	1	1	1	1	1	1.21096	1
451	0	2	29.3507	0	0	0	1	0	0	1190	61	1	0	conservative	1	1	1	1	0	3.70137	0
452	0	1	60.7205	1	1	0	1	0	0	1368	60	1	3	PCI	1	1	1	1	0	0.0246575	0
453	0	2	47.8685	0	0	1	1	0	0	1190	64	1	2	PCI	1	1	1	1	0	3.52055	0
454	1	1	68.5507	1	1	0	0.8	0	0	22	68	1	1	PCI	1	1	1	1	0	4.18356	0
455	0	1	86.1699	1	1	0	1.4	0	0	4354.92	36	1	3	PCI	1	1	1	1	1	3.73151	0
456	0	2	45.9425	1	1	1	2.43748	0	0	578	38	1	3	conservative	1	1	1	1	0	2.70685	1
457	0	2	65.3781	1	0	0	1.1	0	0	582	64	1	2	PCI	1	1	1	1	0	2.96986	0
458	0	1	73.6712	0	0	1	0.9	0	0	1484	55	1	2	PCI	1	1	1	1	0	3.43836	0
459	1	1	61.6247	1	0	0	0.9	0	0	2006	52	1	3	PCI	1	1	1	1	0	3.16438	0
460	0	2	87.8164	1	0	1	1.2028	0	0	632	55	1	3	PCI	1	1	1	1	1	3.42192	0
461	1	2	51.5726	1	1	1	0.8	0	0	302	71	1	0	conservative	1	1	1	1	0	3.53973	0
462	0	1	76.8493	1	0	0	1.58293	0	0	956	56	1	3	PCI	1	1	1	1	0	3	0
463	0	2	62.8274	1	0	1	1.50351	0	0	4800	37	1	1	PCI	1	1	1	1	1	3.15342	0
464	0	2	60.8904	1	0	1	1.08711	0	0	1460	47	1	1	PCI	1	1	1	1	0	3.42192	0
465	0	2	62.3507	1	0	1	1.25528	0	0	426	56	1	2	PCI	1	1	1	1	1	3.52877	0
466	0	2	46.8082	0	0	1	1.31866	0	0	3700	39	1	3	PCI	0	0	0	0	0	0.0958904	1
467	0	1	87.5863	1	1	0	1.79814	0	0	1684	52	1	3	PCI	1	1	1	1	0	2.87671	0
468	0	2	46.8055	1	1	1	1	0	0	1006	56	1	2	PCI	1	1	1	1	0	3.0411	0
469	0	1	79.2932	0	0	0	1.73404	0	0	1148	58	1	3	PCI	1	1	1	1	0	3.34521	0
470	1	1	67.8301	1	0	1	0.835593	0	0	150	61	1	3	PCI	1	0	0	1	0	0.345205	1
471	0	2	63.3397	0	0	1	1.56512	0	0	518	64	1	2	PCI	1	1	1	1	0	3.38082	0
472	0	2	59.4411	1	0	0	1.70222	0	0	2540	49	1	1	PCI	1	1	1	1	1	5	0
473	1	1	68.3781	1	1	0	0.8	0	0	326	64	1	2	PCI	1	1	1	1	1	4.43014	0
474	0	1	71.5918	1	0	0	0.693685	0	0	1274	59	1	3	PCI	1	1	1	1	0	2.83562	0
475	1	1	78.9288	1	1	1	1.24621	0	0	1316	42	1	2	PCI	1	1	1	1	0	3.01644	0
476	0	2	75.1041	0	0	0	1.1109	0	0	1998	44	1	2	PCI	1	1	1	1	0	3.67397	0
477	0	2	39.5151	1	0	1	0.87313	0	0	1218	49	1	1	PCI	1	1	1	1	0	3.36438	0
478	0	2	41.2164	0	0	1	1.59593	1	0	710	47	1	1	PCI	1	1	1	1	1	1.38082	1
479	0	2	67.526	1	0	0	2.07997	1	0	716	30	1	3	PCI	1	1	1	1	1	3.53151	0
480	0	2	52.3945	0	0	1	1.74589	0	0	2818.23	60	1	3	conservative	0	0	0	0	0	1.76986	1
481	0	2	61.8575	1	1	1	1.4	0	0	106	20	1	3	PCI	1	1	1	1	1	3.33973	0
482	1	1	63.4959	0	0	0	1.38549	0	0	3486	60	1	2	PCI	1	1	1	1	1	3.30685	0
483	0	2	72.0548	1	1	0	1.83664	0	0	3776	15	1	2	conservative	0	0	0	0	0	0.136986	1
484	0	1	67.8274	1	0	0	1.20448	0	0	192	52	1	2	PCI	1	1	1	1	1	3.29589	0
485	0	2	51.3753	1	0	1	1.27282	0	0	688	65	1	3	PCI	1	1	1	1	0	3.39452	0
486	0	1	58.6027	1	0	0	1.07552	0	0	78	61	1	1	PCI	1	1	1	1	0	2.9726	0
487	0	2	43.7315	1	0	0	1.13606	0	0	358	82	1	1	PCI	1	1	1	1	0	2.75616	0
488	0	2	66.2356	1	0	0	1.2	0	0	2302	36	1	1	PCI	1	1	0	1	0	2.93151	0
489	0	2	58.5671	1	0	0	1.85898	0	0	1118	62	1	1	PCI	1	1	1	1	0	3.29041	0
490	0	2	23.1014	1	0	1	2.7	0	0	3620	39	1	1	PCI	1	1	1	1	0	3.8137	0
491	0	1	77.2411	1	0	0	1.37119	0	0	684	31	1	3	PCI	1	1	1	1	1	3.28493	0
492	0	2	61.7425	1	0	1	1.74498	0	0	1506	51	1	3	PCI	1	1	1	1	0	2.94795	0
493	0	2	54.6137	1	1	1	1.1	0	0	188	76	1	2	PCI	1	1	1	1	0	2.89589	0
494	0	1	68.863	1	1	0	1.5	0	0	2152	23	1	3	PCI	1	1	1	1	1	2.1863	1
495	0	1	79.2877	1	0	0	1.04691	0	0	1692	34	1	3	PCI	1	1	1	1	1	3.26027	0
496	1	2	50.1781	1	0	0	1.08468	0	0	820	66	1	1	conservative	1	1	1	1	1	2.84658	0
497	0	2	69.2795	1	1	0	2.0569	0	1	1248	63	1	0	conservative	1	1	1	1	1	2.76438	0
498	1	1	76.1671	1	1	0	1.20444	0	0	1354	71	1	2	PCI	1	1	1	1	0	3.5726	0
499	0	2	58.2685	1	0	0	1.3	0	0	1008	57	1	3	PCI	1	1	1	1	1	3.4274	0
500	0	1	79.2822	1	1	0	1.69754	0	0	1116	33	1	3	PCI	1	1	1	1	1	3.21644	0
501	0	2	44.7342	1	0	1	1.2	0	0	4456	46	1	1	PCI	1	1	1	1	1	4.63562	0
502	0	1	80.5014	1	1	0	1.70049	0	0	1602	47	1	3	PCI	1	1	1	1	1	3.29863	1
503	0	1	73.0986	1	0	0	1.9	0	0	148	75	1	1	PCI	1	1	1	1	1	2.97808	0
504	0	2	57.8	1	0	1	1.6	0	0	2886	35	1	1	PCI	1	1	1	1	1	3.34521	0
505	0	1	65.3151	1	1	1	1.3	0	0	3070	62	1	2	PCI	1	1	1	1	1	2.90959	0
506	0	1	60.0904	1	0	0	1.3	0	0	996	41	1	1	conservative	1	1	1	0	0	2.94795	0
507	0	1	76.2219	1	0	0	2.14259	0	0	230	61	1	3	PCI	1	1	1	1	1	3.15342	0
508	1	1	78.1096	1	0	0	0.992885	0	0	2528	31	1	3	PCI	1	1	1	1	1	3.15616	0
509	0	1	47.4849	1	0	0	1.3	0	0	4254	51	1	1	PCI	1	1	1	1	1	2.83014	0
510	0	1	61.5205	1	1	0	2.1	0	0	1530	53	1	2	PCI	1	1	1	1	0	3.25479	0
511	0	2	62.1397	1	0	0	1.3	0	0	2948	42	1	3	PCI	1	1	1	1	1	4.13151	0
512	0	1	81.4986	1	0	0	1.07943	0	0	1570	43	1	3	PCI	1	1	1	1	1	3.12329	0
513	0	1	79.6986	1	0	0	1.59177	0	0	266	25	1	3	PCI	1	1	1	1	1	0.293151	1
514	0	1	76.1178	1	0	0	0.512524	0	0	74	59	1	1	PCI	1	1	1	1	0	3.16438	0
515	0	1	65.6877	1	0	1	1.2	0	0	966	70	1	3	PCI	1	1	1	1	0	2.82192	0
516	0	1	71.5233	0	0	0	1.3	0	0	1134	53	1	3	PCI	0	0	0	0	0	2.90411	0
517	0	2	61.3534	1	1	1	1.6	0	0	426	83	1	3	conservative	1	1	1	0	1	1.23288	1
518	0	2	51.263	1	0	1	1.2	0	0	2404	53	1	1	PCI	1	1	1	1	0	2.87397	0
519	0	2	59.2356	1	1	0	1.5	0	0	652	32	1	3	PCI	1	1	1	1	1	2.5726	1
520	0	1	73.2164	1	1	0	0.8	1	0	142	55	1	3	PCI	1	1	1	1	0	0.10137	1
521	0	2	47.474	1	0	1	0.650821	0	0	2678	32	1	1	PCI	1	1	1	1	1	3.40548	0
522	0	2	56.0603	1	0	1	1.2	0	0	202	62	1	3	PCI	1	1	1	1	0	2.60274	0
523	0	2	40.0548	1	0	1	2.44258	0	0	4440	38	1	1	PCI	1	1	1	1	1	3.48493	0
524	0	2	62.7589	1	0	1	1.1	1	0	100	22	1	3	PCI	1	1	1	1	0	4.76986	0
525	1	1	59.8301	1	1	1	1.6	0	0	3002	38	1	1	PCI	1	1	1	1	1	2.67397	0
526	0	2	51.3781	0	0	1	1.34448	0	0	3042	29	1	3	PCI	0	0	0	0	0	3.2137	0
527	0	2	44.7178	0	0	1	1	0	0	608	44	1	1	PCI	1	1	1	1	0	2.76986	0
528	0	1	68.1233	1	1	0	1.8	0	0	1160	37	1	1	PCI	1	1	1	1	1	2.4274	1
529	0	1	76.1233	1	0	0	1.05996	0	0	708	30	1	1	PCI	1	1	1	1	1	2.67671	0
530	1	1	61.9863	1	0	1	1.3	0	0	1636	42	1	1	PCI	1	1	1	1	1	3.01096	0
531	1	1	76.6027	1	0	0	1.14662	0	0	660	50	1	2	PCI	1	1	1	1	0	2.64932	0
532	0	2	37.2959	0	0	1	0.90028	0	0	4270	40	1	1	PCI	1	1	1	1	1	4.69589	0
533	0	2	78.9123	1	1	1	1.11133	0	0	472	33	1	1	PCI	1	1	1	1	1	2.69863	0
534	0	1	59.8603	1	1	1	1.1	0	0	2000	50	1	1	PCI	1	1	1	1	1	3.01918	0
535	1	1	77.0329	1	1	0	0.755296	0	1	166	41	1	2	PCI	1	1	1	1	1	2.74521	0
536	0	2	62.8658	1	1	1	1.5	1	0	1082	65	1	3	PCI	1	1	1	1	1	2.98082	0
537	1	1	77.3589	1	0	0	0.789708	0	0	1042	66	1	2	PCI	1	1	1	1	0	3.27123	0
538	1	1	67.5041	1	0	0	1.2	0	0	2180	67	1	3	PCI	1	1	1	1	1	2.69315	0
539	0	1	65.4	1	1	0	1.5	0	0	3878	52	1	2	PCI	1	1	1	1	1	2.76438	0
540	0	2	59.8274	1	0	1	2.2	0	0	206	41	1	2	PCI	1	1	1	1	1	2.14521	1
541	1	1	75.6247	1	0	0	1.32381	0	0	108	57	1	3	PCI	1	1	1	1	0	2.98082	0
542	0	2	50.8767	0	0	0	1.59078	0	0	4102	40	1	3	PCI	1	1	1	1	1	2.52877	0
543	1	2	79.4849	0	1	0	1.42463	1	0	964	23	1	2	PCI	1	1	1	1	1	0.235616	1
544	0	2	60.4603	1	0	1	1.4	0	0	1038	55	1	3	PCI	1	1	1	1	0	2.94247	0
545	0	2	64.5425	0	0	1	1.2	0	0	700	54	1	3	PCI	1	1	1	1	0	2.98082	0
546	1	1	52.5288	1	0	0	1.2	0	0	486	72	1	2	PCI	1	1	1	1	1	3.20548	0
547	0	2	61.0384	1	0	1	1.6	0	0	554	39	1	2	PCI	1	1	1	1	1	4.75616	0
548	1	1	60.4822	0	0	0	1	0	0	848	55	1	0	conservative	1	1	1	1	0	2.69589	0
549	0	2	59.1233	0	0	0	1.82125	0	0	1410.55	53	1	2	PCI	1	1	1	1	0	2.53425	0
550	1	1	76.7425	1	0	0	1.01453	0	0	1172	53	1	3	PCI	1	1	1	0	1	2.6274	0
551	1	1	74.1863	1	0	0	1.1	0	0	2140	51	1	1	PCI	1	1	1	1	0	3.8274	0
552	1	1	73.2986	1	0	1	0.7	0	0	1744	60	1	1	PCI	1	1	1	1	0	3	1
553	0	1	68.9178	1	1	0	1.8	0	0	406	20	1	3	PCI	1	1	1	1	1	2.85479	0
554	0	2	35.4685	0	0	1	0.550718	0	0	2598	54	1	1	PCI	1	1	1	1	0	2.89041	0
555	0	1	81.7288	1	0	1	1.79619	0	0	1912	55	1	2	PCI	1	1	1	1	0	3.17534	0
556	0	1	74.5753	1	0	0	2	1	0	3160	28	1	3	PCI	1	1	1	1	1	3.04384	0
557	0	2	62.0192	1	0	0	2.23555	0	1	12820	61	1	2	PCI	1	0	0	0	0	0.668493	1
558	0	2	67.874	1	1	1	1.4	0	0	438	64	1	1	PCI	1	1	1	1	1	3.03562	0
559	0	2	64.4685	1	0	1	1.4	0	0	234	68	1	1	PCI	1	1	1	1	0	2.83014	0
560	0	2	66.8356	0	0	1	1.2	0	0	1058	57	1	1	PCI	1	1	1	1	0	2.51781	0
561	0	2	35.6329	0	0	1	1	1	0	3142	51	1	3	PCI	1	1	1	1	1	2.99452	0
562	0	1	61.274	1	0	0	1.2	0	0	2300	70	1	1	PCI	1	1	1	1	1	2.58904	0
563	0	2	42.6027	1	0	0	1.1	1	0	1026	40	1	2	PCI	1	1	1	1	1	4.34521	0
564	0	1	53.9096	1	0	1	1	0	0	862	63	1	1	PCI	1	1	1	1	0	2.45205	0
565	0	2	66.6986	1	1	1	1.91184	0	0	330	43	1	3	CABG	0	0	0	0	0	2.53151	0
566	0	1	58.1041	1	0	0	1.4	0	0	642	53	1	3	PCI	1	1	1	1	1	2.8274	0
567	0	1	61.0658	1	0	1	1.7	0	0	2960	58	1	0	PCI	1	1	1	1	1	4.34247	0
568	0	2	90.3616	0	0	0	1.82494	0	0	2922	38	1	3	PCI	0	0	0	0	0	2.51233	0
569	0	2	42.326	0	0	1	0.8	1	0	2554	49	1	2	PCI	1	1	1	1	1	2.62466	0
570	1	1	75.5863	1	0	0	1.1801	0	0	1364	59	1	2	PCI	1	1	1	1	0	2.33699	0
571	0	2	73.8274	1	0	0	0.9	1	0	1074	40	1	3	CABG	1	1	1	1	1	2.46849	0
572	0	2	62.2493	0	0	1	0.9	0	0	2170	33	1	1	PCI	1	1	1	1	1	2.45753	0
573	1	1	70.7973	1	0	0	1	0	0	3028	54	1	2	PCI	1	1	1	1	1	3.53425	0
574	0	1	79.2082	1	0	0	1.97535	0	0	137.698	55	1	3	conservative	1	1	1	1	0	2.29315	0
575	0	2	47.0438	0	0	1	1.2	0	0	3530	39	1	3	PCI	1	1	1	1	1	2.91233	0
576	0	1	37.5342	0	0	1	1.1	0	0	170	42	1	3	PCI	1	1	1	1	0	2.90137	0
577	0	2	53.6137	1	1	1	1.64216	1	0	5175.45	30	1	3	PCI	1	1	1	1	1	2.70959	0
578	1	1	78.1726	1	0	0	0.959705	0	0	166	23	1	3	PCI	1	1	1	1	1	2.63288	0
579	0	2	67.0575	1	0	1	1.4	0	0	576	47	1	3	PCI	1	1	1	1	1	2.20274	0
580	0	2	82.6247	0	0	0	1.46956	0	1	674	47	1	2	PCI	1	1	1	1	1	2.43288	0
581	0	2	59.2849	1	0	1	1	0	0	156	74	1	1	PCI	1	1	1	1	0	2.33973	0
582	0	2	65.1781	1	1	1	1.1	0	0	1490	50	1	3	PCI	1	1	1	1	1	2.79726	0
583	0	1	69.9753	1	0	0	1.5	0	0	1890	37	1	1	PCI	1	1	1	1	1	2.46027	0
584	0	2	63.4795	1	0	0	1.2	0	0	1128	71	1	1	PCI	1	1	1	1	0	2.69315	0
585	0	2	67.6493	1	0	0	1	0	0	950	53	1	2	PCI	1	1	1	1	0	2.73151	0
586	0	2	67.5397	1	0	1	1.27878	0	0	2002	69	1	1	PCI	1	1	1	1	0	2.82192	0
587	0	2	63.8493	1	0	1	1.00845	0	0	180	58	1	2	PCI	1	1	1	1	1	3.25479	0
588	1	2	86.8603	0	0	0	1.9681	0	0	466.733	48	1	0	conservative	0	0	0	0	0	2.43288	0
589	0	2	47.5479	1	0	1	1.20211	0	0	132	47	1	2	PCI	1	1	1	1	1	2.67945	0
590	0	2	62.7068	1	0	1	1	0	0	2164	50	1	2	PCI	1	1	1	1	0	2.68493	0
591	0	2	54.8849	1	0	1	1.2	1	0	1402	45	1	3	PCI	1	1	1	1	1	2.36164	0
592	0	2	47.1178	0	0	1	1	0	0	2898	50	1	2	PCI	1	1	1	1	1	2.25753	0
593	0	2	84.7342	1	0	1	1.92328	0	0	386	53	1	3	PCI	1	1	1	1	1	2.36712	0
594	0	2	47.9726	1	0	0	1	0	0	1594	65	1	1	PCI	1	1	1	1	0	2.85753	0
595	0	1	76.389	1	0	0	1.83731	1	0	264	34	1	3	PCI	1	1	1	1	1	2.24932	0
596	0	1	69.1479	1	1	0	1.6	0	0	382	40	1	3	conservative	1	1	1	1	1	2.39178	0
597	0	2	61.7644	1	0	1	1.4	0	0	246	65	1	1	PCI	1	1	1	1	0	2.29863	0
598	1	1	65.2603	1	0	0	1.8	0	0	1008	40	1	3	PCI	1	0	1	1	1	4.33151	0
599	0	2	66.537	1	0	0	1.3	1	0	5100	26	1	2	PCI	1	1	1	1	1	2.23836	0
600	0	1	68.4	1	1	0	1.4	0	0	82	59	1	2	PCI	1	1	1	1	0	2.31233	0
601	0	2	59.7041	1	0	1	1.59561	0	0	1274	51	1	3	PCI	1	1	1	1	0	3.17534	0
602	1	1	35.274	0	0	1	1.98837	0	0	1776	40	1	1	PCI	1	1	1	1	0	2.25479	0
603	0	2	54.0548	0	0	1	1.2	0	0	2320	41	1	3	PCI	1	1	1	1	1	2.24658	0
604	0	2	52.4548	1	0	1	1.57552	1	0	7092.37	32	1	3	PCI	1	1	1	0	1	2.82192	0
605	0	2	72.7726	1	0	0	0.88438	1	0	1126	58	1	2	PCI	1	1	1	1	0	2.53699	0
606	0	1	62.3534	0	0	1	1.4376	0	0	1914	41	1	2	PCI	1	1	1	1	1	2.50959	0
607	0	2	51.2356	1	0	0	1.8	0	0	1456	19	1	3	PCI	1	1	1	1	1	2.65479	0
608	0	1	65.4219	1	1	0	1.4	0	0	1998	55	1	1	PCI	1	1	1	1	1	2.29863	0
609	0	2	62.4685	0	0	0	1.1	0	0	762	56	1	1	PCI	1	1	1	1	0	3.38356	0
610	1	1	78.7068	1	0	0	1.00589	0	0	260	60	1	3	PCI	1	1	1	1	0	2.24384	0
611	0	2	53.863	0	0	0	1.2	0	0	1542	57	1	1	PCI	1	1	1	1	0	1.91781	0
612	0	2	64.1918	1	0	0	1.2	0	0	774	50	1	2	PCI	1	1	1	1	0	2.50685	0
613	0	2	33.3808	0	0	1	1	0	0	592	56	1	1	PCI	1	1	1	1	0	0.0191781	0
614	0	1	67.5096	1	0	0	1.9	0	0	1784	47	1	1	PCI	1	1	1	1	1	2.52603	0
615	1	2	90.337	1	1	1	0.970102	0	0	246	55	1	3	PCI	1	1	1	1	1	0.545205	1
616	0	1	63.2959	1	1	0	1.2	0	0	354	57	1	3	PCI	1	1	1	1	0	0.0657534	0
617	0	2	51.9534	0	0	1	1	0	0	2946	53	1	1	PCI	1	1	1	1	1	2.76164	0
618	0	2	64.7918	1	0	1	1.1	0	0	540	56	1	3	PCI	1	1	1	1	0	2.50137	0
619	1	1	73.189	1	1	0	1.10922	0	1	930	51	1	3	PCI	1	1	1	1	1	0.208219	1
620	0	2	48.789	1	0	1	1	0	0	864	61	1	1	PCI	1	1	1	1	0	2.49315	0
621	1	1	70.0438	1	0	1	1.09821	0	0	1686	47	1	2	PCI	1	1	1	1	0	2.66849	0
622	1	1	68.6603	1	0	0	0.8	0	0	2528	59	1	2	PCI	1	1	1	1	0	2.50685	0
623	0	1	76.2932	1	0	0	1.83594	0	0	462	49	1	3	PCI	1	1	1	1	1	2.27397	0
624	0	2	51.3205	0	0	0	1.06628	0	0	3740	25	1	1	PCI	1	1	1	1	0	0.29863	1
625	0	2	47.5425	1	0	1	1.61135	0	0	278	73	1	1	PCI	1	1	1	1	0	2.50137	0
626	0	2	60.7178	1	1	0	0.9	0	0	426	40	1	2	PCI	1	1	1	1	1	2.53151	0
627	1	2	87.0329	0	0	0	0.830943	0	1	1186	50	1	2	PCI	1	1	1	1	1	0.432877	1
628	0	2	61.5096	1	1	0	1.1	0	0	154	42	1	3	PCI	1	1	1	1	1	2.52603	0
629	0	1	83.7288	1	0	0	1.15291	0	1	1840	58	1	2	PCI	1	1	1	1	0	2.2	0
630	0	2	65.9288	0	0	1	1.1	0	0	372	45	1	1	PCI	1	1	1	1	0	2	0
631	1	1	59.1863	0	0	1	0.7	0	0	2132	50	1	1	PCI	1	1	1	1	0	2.60274	0
632	0	2	50.7808	0	0	0	1.2	0	0	1252	49	1	3	PCI	1	1	1	1	1	2.16712	0
633	0	2	40.2493	0	0	0	1.2	0	0	6750	41	1	1	PCI	1	1	1	1	1	2.60548	0
634	0	2	45.2247	1	0	0	1	0	0	2546	54	1	1	PCI	1	1	1	1	0	2.41096	0
635	0	2	65.9123	1	0	0	1.38321	0	0	676	59	1	3	PCI	1	1	1	1	0	2.48219	0
636	0	2	58.1863	1	0	1	1.68803	1	0	1754	68	1	2	PCI	1	1	1	1	0	2.60274	0
637	0	1	64.2822	1	0	0	1.1	0	0	1126	47	1	2	PCI	1	1	1	1	0	4.17534	0
638	0	1	45.0877	1	0	1	1	0	0	5058	59	1	2	PCI	1	1	1	1	0	2.67123	0
639	1	1	64.4137	1	1	0	1.3	0	0	640	63	1	1	PCI	1	1	1	1	1	1.99178	0
640	0	1	58.5945	0	0	0	1.14066	0	0	1302	70	1	2	PCI	1	1	1	1	0	1.86301	0
641	0	2	71.8493	0	0	0	1.2	0	0	2222	41	1	1	PCI	1	1	1	1	1	2.41644	0
642	0	2	45.5205	1	0	1	1.1	0	0	1528	50	1	1	PCI	1	1	1	1	0	2.56164	0
643	1	2	82.3479	1	0	0	1.40753	0	0	1528	78	1	0	conservative	1	1	1	0	0	1.09041	1
644	0	2	47.5699	1	0	1	1	0	0	1090	69	1	1	PCI	1	1	1	1	0	2.44384	0
645	1	1	69.8329	1	0	0	1.4902	1	0	833.901	60	1	0	PCI	0	0	0	0	0	3.87945	0
646	0	2	72.3397	0	0	0	3.6	1	0	4471.07	40	1	1	CABG	1	1	0	1	1	1.0411	1
647	0	2	73.6932	1	0	1	0.867578	0	0	260	43	1	2	PCI	1	1	1	1	0	2.12603	0
648	0	1	70.663	1	0	0	1.48457	0	0	2672	45	1	1	PCI	1	1	1	0	1	2.03288	0
649	0	2	35.3863	1	0	1	1.1	0	0	330	69	1	1	PCI	1	1	1	1	0	3.63288	0
650	0	2	42.1068	1	0	1	1.4	0	0	5778	42	1	2	PCI	1	1	1	1	1	2.13425	0
651	0	1	62.5479	1	1	0	1	0	0	96	41	1	3	PCI	1	1	1	1	0	1.93699	0
652	1	1	41.2521	0	0	1	0.8	1	0	3278	40	1	2	PCI	1	1	1	1	1	4.14795	0
653	0	2	65.1616	0	0	1	1.3	0	0	252	71	1	1	PCI	1	1	1	1	0	2.47123	0
654	0	2	60.4822	1	0	1	1.4	0	0	326	68	1	2	PCI	1	1	1	1	0	1.94247	0
655	0	1	74.8219	1	1	0	1.6	0	0	1196	36	1	3	PCI	1	1	0	1	1	2	0
656	1	1	84.2493	0	0	0	0.796552	0	0	2664	39	1	3	PCI	1	1	0	1	1	2.30959	0
657	0	2	67.9836	1	0	1	1.1	0	0	230	48	1	3	PCI	1	1	1	1	0	2.33699	0
658	0	1	43.4959	0	0	1	0.80289	0	0	1746	52	1	2	PCI	1	1	0	1	0	2.35342	0
659	0	1	68.5315	0	1	0	1.20425	0	0	1026	34	1	1	PCI	1	1	1	1	0	0.909589	1
660	0	2	84.2	1	0	0	1.63837	0	1	354	32	1	3	conservative	1	1	1	1	1	2.43288	0
661	1	1	84.5315	0	0	0	1.4009	0	0	764	53	1	3	PCI	1	1	1	1	0	2.01644	0
662	0	1	73.063	0	0	0	1.1	0	0	2652.75	44	1	1	PCI	1	1	1	1	1	2.26027	0
663	1	1	82.4712	1	0	0	1.17638	0	0	350	51	1	0	PCI	1	1	1	0	1	1.97808	0
664	0	2	60.2466	1	0	1	0.875367	0	0	2272	46	1	3	PCI	1	1	1	1	0	2.32877	0
665	1	1	69.0685	1	1	1	1.41047	0	0	1092	21	1	0	PCI	1	1	1	1	1	0.109589	1
666	1	2	88.8137	1	0	1	0.645939	0	0	610	68	1	3	PCI	1	1	1	0	1	0.0958904	1
667	1	1	82.0712	1	1	0	0.9	0	0	578	56	1	2	PCI	1	1	1	0	1	2.14795	0
668	0	1	64.2986	1	1	0	1.2	0	0	2612	50	1	3	PCI	1	1	1	1	1	2.23288	0
669	0	1	81.2986	1	0	0	1.13265	0	1	2112	60	1	3	PCI	1	1	1	1	1	1.90411	0
670	0	2	42.3315	1	0	0	1.1	0	0	1176	48	1	3	PCI	1	1	0	1	0	1.91781	0
671	0	1	75.9479	1	1	0	1.15638	1	0	432	45	1	3	PCI	1	1	1	1	1	1.98082	0
672	0	1	68.1699	0	1	1	0.8	0	0	2934	63	1	2	PCI	1	1	1	1	0	2.21918	0
673	0	2	56.0274	0	0	1	0.882288	0	0	5041.91	50	1	2	PCI	1	1	1	1	0	4.02466	0
674	1	1	62.337	0	0	0	1.73949	0	0	111.249	42	1	2	PCI	1	1	1	1	1	0.624658	0
675	0	2	40.1123	0	0	1	1.2	0	0	1640	58	1	1	PCI	1	1	0	1	0	2.96712	0
676	1	1	63.863	1	0	0	0.9	0	0	5656	35	1	3	PCI	1	1	1	1	1	2.03014	0
677	1	2	77.9562	1	0	0	0.760287	1	0	812	22	1	0	PCI	1	1	1	1	1	1.86849	0
678	0	2	79.2137	0	0	0	1.82767	0	1	1118	29	1	1	PCI	1	1	1	1	1	2.18904	0
679	0	2	57.1233	1	0	1	0.9	0	0	826	45	1	1	PCI	1	1	1	1	0	1.76986	0
680	0	2	54.1781	1	1	1	1.4	0	0	1034	55	1	3	PCI	1	1	1	1	0	3.82192	0
681	1	1	62.9397	1	1	1	0.8	0	0	972	55	1	1	PCI	1	1	1	1	0	2.17534	0
682	0	2	70.5205	1	1	1	1.3	0	0	636	48	0	0	conservative	1	1	1	1	1	1.70411	0
683	0	2	77.5863	1	0	1	1.75379	0	0	4522	30	1	3	PCI	1	1	1	1	0	2.15068	0
684	0	2	36.4795	1	0	0	0.8	0	0	780	63	1	1	PCI	1	1	1	1	0	1.85479	0
685	1	1	79.5205	1	1	0	1.78261	1	0	3142.43	48	1	3	PCI	1	0	1	1	0	0.454795	1
686	0	1	79.6959	1	1	0	1.06519	0	1	638	54	1	3	PCI	1	1	1	1	0	3.79726	0
687	1	1	69.4219	1	0	0	1.25679	0	0	193.062	39	1	1	PCI	1	1	1	1	1	2.11233	0
688	1	1	82.7479	1	0	0	1.39531	0	0	400	45	0	0	conservative	1	1	0	1	1	2.30685	0
689	0	2	58.0986	1	0	0	0.9	0	0	542	32	1	0	PCI	1	1	1	1	1	2.09589	0
690	0	2	55.0192	1	0	1	5	1	0	178	44	1	2	PCI	1	1	0	0	1	2.4137	0
691	1	1	43.0493	1	0	1	0.7	0	0	1734	50	1	1	PCI	0	1	1	1	1	2.26027	0
692	0	2	67.937	1	1	1	0.9	1	0	236	40	1	3	PCI	1	1	1	1	1	1.94795	1
693	0	2	40.7452	1	0	1	1	0	0	2390	48	1	3	PCI	1	1	1	1	1	3.83288	0
694	0	2	50.9014	1	0	1	1.4	0	0	842	60	1	3	PCI	1	1	1	1	1	2.49041	0
695	0	2	71.0521	1	1	1	0.9	0	0	470	55	1	3	PCI	1	1	1	1	1	2.73151	0
696	0	2	47.9973	1	0	1	1.60575	0	0	224	65	1	2	PCI	1	1	1	1	0	2.08493	0
697	0	2	64.3671	0	0	0	1.2	0	0	1656	58	1	2	PCI	1	1	1	1	0	1.68767	0
698	0	2	48.8849	1	0	1	1.2	0	0	912	44	1	1	PCI	1	1	1	1	0	3.19452	0
699	1	1	77.9068	1	1	0	0.887819	0	0	100	42	1	2	PCI	0	0	0	0	0	1.27397	1
700	0	2	65.0548	1	0	1	0.8	0	0	1140	58	1	2	PCI	1	1	1	1	0	2.07945	0
701	0	2	84.5726	0	1	0	1.51589	0	0	690	39	1	3	PCI	1	1	1	1	1	2.13151	1
702	0	2	69.0055	1	1	1	1.1	0	0	3220	45	1	1	PCI	1	1	1	1	1	1.77534	0
703	0	1	48.3507	0	0	1	1	0	0	742	62	1	1	PCI	1	1	1	1	0	3.75068	0
704	0	2	46.7096	0	0	1	1.44598	0	0	4750	64	1	2	PCI	1	1	1	1	0	2.21096	0
705	0	2	83.5726	0	1	0	1.51858	1	0	3622	42	1	3	PCI	1	1	1	1	1	0.115068	1
706	0	1	75.926	1	1	0	1.5358	1	0	280	40	1	3	PCI	1	1	1	1	1	2.16712	0
707	0	2	53.1452	1	0	1	1.55307	0	0	856	55	1	3	PCI	1	1	1	1	0	2.3863	0
708	0	2	67.2603	1	0	0	0.9	0	0	820	56	1	3	CABG	0	0	0	0	0	0.372603	1
709	0	2	51.7973	0	0	1	1	0	0	1408	55	1	2	PCI	1	1	1	1	1	2.1589	0
710	0	1	82.6356	1	0	0	0.789691	0	0	2150.12	63	1	3	PCI	1	1	1	1	0	2.03014	0
711	0	2	66.6438	1	0	1	1.1	0	0	2450	40	1	3	PCI	1	1	1	1	1	2.0137	0
712	0	2	59.1178	1	0	1	1.1	0	0	784	54	1	2	PCI	1	1	1	1	1	3.70685	0
713	0	1	67.4767	1	0	0	1.3	0	0	338	55	1	2	PCI	1	1	1	1	1	1.67123	0
714	1	1	81.5233	1	0	0	1.02006	0	0	744	40	1	2	PCI	1	1	1	1	1	2.15068	0
715	0	2	59.8603	0	0	0	1.16571	0	0	348.113	55	1	3	CABG	0	0	0	0	0	2.00274	0
716	0	2	53.4822	1	0	1	0.9	0	0	550	51	1	2	PCI	1	1	1	1	0	1.98356	0
717	0	2	65.7096	1	0	0	1.2	0	0	9632	57	1	2	PCI	1	1	1	1	1	1.57808	0
718	0	2	60.0055	1	1	1	1.2	0	0	758	47	1	2	PCI	1	1	1	1	0	3.13425	0
719	0	1	56.5699	1	0	0	1.6	0	0	11890	52	1	1	PCI	1	1	1	1	1	1.67945	0
720	0	2	65.1836	1	0	0	1.57821	0	0	5596	47	1	3	PCI	1	1	1	1	1	2.12055	0
721	0	1	70.1205	1	1	0	0.9	0	0	1838	57	1	1	PCI	1	1	1	1	1	2.2137	0
722	1	1	82.0822	1	0	0	1.42795	0	0	2294	44	1	1	conservative	1	1	1	1	1	1.94795	0
723	0	2	48.8274	1	0	1	1.1	1	0	17528	25	1	3	PCI	1	1	1	1	1	1.93699	0
724	0	2	54.0658	1	0	0	1.6	0	0	5030	44	1	3	PCI	1	1	1	1	1	1.47671	0
725	0	2	61.7178	0	0	1	1	0	0	884	52	1	2	PCI	1	1	1	1	1	1.93699	0
726	0	1	73.1123	1	1	0	2.7	0	0	450	38	1	2	PCI	1	1	1	1	1	1.59726	0
727	0	1	66.9808	1	0	0	1.37948	0	0	508	64	1	1	conservative	1	1	1	1	0	1.92603	0
728	1	1	71.8603	1	1	0	0.5	0	0	3400	45	1	3	PCI	1	1	1	1	1	1.65753	0
729	0	2	58.9151	0	0	0	0.630549	0	0	2402	52	1	1	PCI	1	1	1	1	0	2.14521	0
730	0	1	59.7479	1	0	1	0.9	0	0	3584	45	1	1	PCI	1	1	1	1	1	1.88219	0
731	1	1	66.3288	1	1	0	0.888699	0	0	2034	45	1	3	PCI	1	1	1	1	1	1.44658	0
732	0	2	72.2986	1	0	1	1.2	0	0	6346	45	1	2	PCI	1	1	1	1	1	2.93425	0
733	1	1	59.3233	1	0	0	1	0	0	1732	49	1	2	PCI	1	1	1	1	0	1.84384	0
734	0	2	70.2137	1	1	1	4.4	0	0	1236	20	1	3	PCI	1	1	1	1	0	0.545205	1
735	0	2	65.5836	1	0	0	0.891857	0	0	788	47	1	3	PCI	1	1	1	1	0	1.72877	0
736	0	2	51.3781	1	0	1	1	0	0	6798	47	1	1	PCI	0	0	0	0	0	1.57534	0
737	0	2	54.5041	1	1	1	0.7	0	0	2664	49	1	2	PCI	1	1	1	1	0	1.96438	0
738	0	1	78.9123	1	0	1	1	0	0	764	42	1	3	PCI	1	0	1	0	0	1.80822	0
739	0	2	70.8247	1	0	1	1.14178	0	1	3136	30	1	2	PCI	1	1	1	1	1	1.93151	0
740	1	1	61.2384	1	0	1	1.10794	0	0	4714.54	49	1	3	PCI	1	1	1	1	0	1.02192	1
741	0	1	67.8027	1	1	0	1.5	0	0	2396	56	1	3	PCI	1	1	1	1	1	3.18082	0
742	1	1	65.211	1	0	0	0.905233	0	0	2072	60	1	2	PCI	1	1	1	1	0	1.80548	0
743	1	1	76.6247	1	1	0	0.998517	0	0	5182	55	1	3	PCI	1	1	1	1	1	1.79726	0
744	0	2	47.674	1	0	1	1.3	0	0	3506.72	55	1	3	PCI	1	1	1	1	0	1.90411	0
745	0	2	37.0986	0	0	0	0.8	0	0	1596	53	1	0	conservative	1	1	1	1	1	1.81918	0
746	0	2	69.0082	1	0	0	1	0	0	1568	55	1	3	PCI	1	1	1	1	1	2.86027	0
747	0	2	62.8164	1	0	0	1	0	0	4868	58	1	3	PCI	1	1	1	1	1	1.4	0
748	0	1	62.1945	1	0	0	1.3	0	0	688	45	1	2	PCI	1	1	1	1	1	1.79452	0
749	1	1	73.0493	1	1	0	0.7	1	0	518	56	1	2	PCI	1	1	1	1	1	1.52603	0
750	1	2	85.6192	1	0	0	0.8	1	0	1574	36	1	0	conservative	1	1	1	1	1	1.96986	1
751	0	2	57.9973	0	1	0	1.2	0	1	549	49	1	0	conservative	0	1	0	0	1	1.56712	0
752	1	1	87.3836	1	1	0	1.50604	0	0	552	45	1	2	PCI	1	1	1	1	1	0.0109589	0
753	1	1	74.8411	1	0	0	0.8	0	0	178	60	1	3	PCI	1	1	1	1	0	1.34247	0
754	0	2	77.2082	1	0	1	1.62539	0	0	6340	35	1	2	PCI	1	1	1	1	1	1.32877	1
755	0	1	69.9123	1	0	0	1.7	0	0	542	62	1	3	PCI	1	1	1	1	1	1.47671	0
756	0	1	61.6986	1	0	1	1.46769	0	0	698	52	1	1	PCI	1	1	1	1	1	1.50685	0
757	0	2	80.989	1	1	1	1.35673	0	0	1144	25	1	3	PCI	1	1	1	1	1	1.92877	0
758	0	2	47.9699	1	0	0	0.95679	0	0	1570	60	1	2	PCI	1	1	1	1	1	3.51781	0
759	0	1	47.0493	1	0	1	1	0	0	14624	44	1	2	PCI	1	1	1	1	1	1.33973	0
760	0	2	60.1041	1	0	1	1	0	0	520	47	1	1	PCI	1	1	1	1	1	1.75342	0
761	0	1	65.6027	1	1	0	0.9	0	0	7550	50	1	3	PCI	1	1	1	1	1	0.964384	1
762	0	2	80.5178	1	0	0	0.9	1	0	1528	42	1	3	conservative	1	1	1	1	1	1.75616	0
763	1	1	78.874	1	1	0	0.788985	0	1	1652	30	1	2	PCI	1	1	1	1	1	0.169863	1
764	0	2	61.8932	0	0	1	1.2	1	0	4534	20	1	3	PCI	1	1	1	1	1	1.44658	0
765	0	2	66.4959	1	1	0	0.87386	0	1	2540	50	1	3	PCI	1	1	1	1	1	3.03288	0
766	0	1	83.7452	1	0	0	1.76738	0	0	386	57	1	1	PCI	1	1	1	1	0	1.74795	0
767	1	2	86.9315	1	0	0	0.818685	1	0	2268	70	1	3	PCI	1	1	1	1	1	1.89315	0
768	0	1	71.2849	1	0	0	0.643955	0	0	3466	59	1	2	PCI	1	1	1	1	0	1.91507	0
769	1	1	77.5699	1	0	0	1.1	0	0	308	53	1	3	PCI	1	1	1	1	0	1.33973	0
770	0	1	68.6822	1	0	1	1.14597	0	0	3480.57	57	1	2	PCI	1	0	0	0	0	1.72603	0
771	1	1	79.5315	1	0	0	0.8	0	0	2524	49	1	1	PCI	1	1	1	1	1	1.47397	0
772	1	1	50.9781	1	1	1	0.9	0	0	3688	45	1	2	PCI	1	1	1	1	0	1.87671	0
773	1	1	68.6904	1	0	0	1.16168	0	0	806	63	1	2	PCI	1	1	1	1	0	0.0958904	1
774	0	2	54.3644	0	0	1	0.9	0	0	1352	41	1	1	PCI	1	1	1	1	1	3.53699	0
775	0	2	63.6466	1	1	1	0.8	0	0	2788	55	1	1	PCI	1	1	1	1	1	2.03836	0
776	0	2	84.9699	0	1	1	0.872101	0	0	4814	51	1	3	PCI	1	1	0	1	1	1.72877	0
777	1	2	73.4082	0	0	0	2.19882	0	1	1990	23	1	0	conservative	1	1	1	1	1	1.0137	1
778	0	1	84.074	0	1	0	1.09858	0	0	716.801	57	1	2	PCI	1	1	1	0	1	0.150685	1
779	0	1	65.1863	0	0	0	0.943241	0	0	7090	48	1	2	PCI	1	1	0	1	0	1.35342	0
780	0	2	73.0411	0	1	1	1.33511	0	0	912	35	1	3	PCI	1	1	1	1	1	1.46575	0
781	0	2	68.8082	1	1	1	1.2	0	0	2262	45	1	1	PCI	1	1	1	1	0	1.99452	0
782	1	1	73.1096	1	0	0	0.7	0	0	2914	56	1	1	PCI	1	1	1	1	1	1.70959	0
783	1	1	54.0329	1	0	1	1.29013	0	0	648	60	1	0	conservative	1	1	1	0	0	1.4411	0
784	0	2	62.2548	1	0	0	1.0973	1	0	4206	23	1	2	PCI	1	1	1	0	1	1.89863	0
785	1	2	33.4164	1	0	1	1.46753	0	0	468	58	1	0	conservative	1	1	1	1	0	3.34521	0
786	1	1	59.1397	1	0	1	1	0	0	2714	52	1	1	PCI	1	1	1	1	0	1.33151	1
787	1	1	73.3863	0	0	1	0.930511	0	0	1764	55	1	1	PCI	1	1	1	1	0	1.23288	0
788	0	1	75.063	1	0	1	0.626443	0	0	2854	46	1	2	PCI	1	1	1	1	1	1.48767	0
789	0	2	47.2438	0	0	1	0.8	0	0	3016	48	1	2	PCI	1	1	1	1	1	1.65205	0
790	0	1	77.7644	1	0	0	1.45341	0	0	2182	46	1	3	PCI	1	1	1	1	0	1.70685	1
791	1	1	72.4329	1	1	0	0.8	0	0	3132	46	1	1	PCI	1	1	1	1	1	1.32055	0
792	1	1	76.8575	1	1	1	0.907434	1	0	994	38	1	3	PCI	1	1	1	1	1	3.25205	0
793	1	1	77.1342	1	1	0	1.42081	0	0	3496	45	1	3	PCI	1	1	1	1	1	1.63836	0
794	0	2	62.5288	1	0	0	1	0	0	9036	43	1	3	PCI	1	1	1	1	1	1.29041	0
795	1	1	73.4603	1	0	0	0.9	0	0	4716	43	1	2	PCI	1	1	1	1	1	0.361644	1
796	0	1	82.2055	1	0	0	0.84618	1	0	1028	30	1	3	PCI	0	1	1	1	0	1.91781	0
797	0	2	60.2027	0	0	1	0.9	0	0	848	57	1	3	PCI	1	1	1	1	0	1.62466	0
798	0	2	51.7644	1	0	1	1	0	0	222	57	1	1	PCI	1	1	1	1	1	1.09589	0
799	1	1	63.8849	1	0	0	0.6	0	0	778	67	1	2	PCI	1	1	1	1	1	1.31233	0
800	0	2	74.411	1	0	1	0.7	0	0	414	41	1	3	PCI	1	1	1	1	1	1.33973	0
801	0	1	51.4219	1	0	0	1	0	0	3942	50	1	1	PCI	1	1	1	1	0	1.77534	0
802	1	1	62.6685	1	0	1	1.23933	0	0	3716	55	1	1	PCI	1	1	1	1	0	1.75342	0
803	1	1	70.2137	1	1	1	1.4	0	0	8158	51	1	3	PCI	1	1	1	1	1	1.58904	0
804	0	1	46.1425	1	0	0	0.9	0	0	3588	55	1	2	PCI	1	1	1	1	0	1.4	0
805	0	2	61.8877	1	1	1	1.1	0	0	4318	58	1	2	PCI	1	1	1	1	0	1.5863	0
806	0	1	66.4082	1	0	1	1	0	0	3148	55	1	1	PCI	1	1	1	1	1	1.6	0
807	0	2	71.7945	0	0	0	0.8	0	0	8678	16	1	2	PCI	1	1	1	1	1	3.30685	0
808	1	1	82.4986	1	0	0	2.1	0	1	2080	56	1	1	PCI	1	1	1	1	1	2.0411	0
809	0	1	59.5507	0	1	0	1	0	0	3160.82	49	1	2	PCI	1	1	1	1	0	3.29315	0
810	0	2	49.4137	1	0	1	1.1	0	0	1036	48	1	3	PCI	1	1	1	1	1	1.88767	0
811	0	1	53.0767	1	1	1	0.9	0	0	5282	38	1	3	PCI	1	1	1	1	1	1.17808	0
812	1	1	79.4932	1	0	0	1.34316	0	0	178	32	1	2	conservative	0	0	0	0	0	1.76438	0
813	1	2	75.1288	1	1	0	4.6	1	0	1192	72	1	0	conservative	1	0	0	1	1	1.26849	0
814	0	2	55.8521	0	0	1	0.9	0	0	2760	61	1	1	PCI	1	1	1	1	1	1.67397	0
815	1	1	64.389	1	0	1	0.7	0	0	7694	30	1	2	PCI	1	1	1	1	1	3.13151	0
816	0	2	41.211	1	0	1	1.7	0	0	19932	38	1	2	PCI	1	1	1	1	1	1.67945	0
817	0	2	34.4521	0	1	1	0.6	0	0	1156	40	1	2	PCI	1	1	1	0	0	3.16164	0
818	0	1	65.2795	1	0	1	2.2	0	0	734	55	1	2	PCI	1	1	1	1	0	1.66849	0
819	1	1	83.7808	0	1	0	0.841114	0	0	7194	56	1	3	PCI	1	1	1	1	1	1.84658	0
820	0	2	48.7945	1	1	0	0.7	0	0	1288	52	1	3	conservative	1	1	1	1	0	1.2	0
821	0	2	44.0274	1	0	1	0.9	0	0	3012	35	1	1	PCI	1	1	1	1	1	3.15616	0
822	0	2	65.8082	1	0	1	1.2	0	0	10716	66	1	1	PCI	1	1	1	1	0	1.44658	0
823	0	2	54.8603	0	0	0	0.9	0	0	2632	35	1	1	PCI	1	1	1	1	1	1.62466	0
824	0	1	74.8	1	0	0	1.34986	0	0	2496	66	1	3	PCI	1	1	1	1	1	1.4411	0
825	0	2	66.0767	1	0	1	1.3	0	0	962	35	1	3	PCI	1	1	1	1	1	1.43288	0
826	0	1	55.3425	0	0	1	1.15825	0	0	8760	38	1	2	PCI	1	1	1	1	1	2.49315	0
827	0	2	52.3452	0	0	0	1.1	0	0	1576	54	1	3	PCI	1	1	1	1	0	1.46849	0
828	0	2	44.1014	1	0	0	1	0	0	3966	62	1	1	PCI	1	1	1	1	0	1.44384	0
829	0	2	81.4192	1	0	0	1.80993	1	0	911	30	1	3	conservative	1	1	1	1	1	1.4137	0
830	1	1	70.411	1	1	0	1.9	0	0	4480	53	1	3	PCI	1	1	1	1	1	1.73151	0
831	0	1	63.3041	1	0	0	1.3	1	0	574	43	1	3	PCI	1	1	1	1	1	1.49315	0
832	0	2	73.2082	1	0	1	1.2	0	0	804	38	1	2	PCI	1	1	1	1	1	1.43288	0
833	1	1	71.4767	1	0	1	1.43936	0	0	824	60	1	1	PCI	1	1	1	1	0	1.45479	0
834	1	2	72.0822	1	0	0	0.848039	0	1	728	56	1	1	conservative	1	1	1	1	1	1.20274	0
835	0	1	59.2027	1	1	0	1	0	0	312	58	1	1	PCI	1	1	1	1	0	1.35616	0
836	1	1	78.1507	1	1	1	1.74037	0	0	2054	56	1	3	PCI	1	1	1	1	1	1.93425	1
837	0	2	73.2603	0	0	1	0.9	0	0	503	48	1	1	PCI	1	1	1	1	0	1.37808	0
838	0	1	81.4082	1	0	0	0.986343	0	0	267	60	1	3	PCI	1	1	1	1	1	3.07671	0
839	0	2	65.6849	1	0	1	0.8	1	1	568	44	1	3	PCI	1	1	1	1	0	1.49589	0
840	0	2	60.4986	0	0	0	0.7	0	0	1962	49	1	3	PCI	1	1	1	1	0	1.07671	0
841	0	2	62.6877	0	1	1	1.1	0	0	341	58	1	1	PCI	1	1	1	1	0	1.36712	0
842	0	1	85.7863	1	0	0	1.55729	0	1	422	44	1	3	PCI	1	1	1	1	0	3.03014	0
843	0	2	82.9836	0	1	0	0.936698	0	1	481	54	1	2	PCI	1	1	1	1	1	1.37808	0
844	0	2	42.3945	0	0	1	1.02662	0	0	1585	52	1	1	PCI	1	1	1	1	0	1.47945	0
845	0	2	61.0493	1	0	1	0.9	0	0	1938	55	1	2	PCI	1	1	1	1	0	3.01918	0
846	0	2	51.1945	0	0	1	1	0	0	4003	48	1	2	PCI	1	1	1	1	1	3.03288	0
847	0	2	69.0219	1	0	0	1	0	0	637	55	1	3	PCI	1	1	1	1	0	3.00274	0
848	0	1	57.2301	1	0	0	1	0	0	413	65	1	2	PCI	1	1	1	1	0	1.32329	0
849	0	2	54.1808	1	0	1	1	0	0	1812	49	1	1	PCI	1	1	1	1	0	2.99726	0
850	1	1	74.6192	1	0	0	0.9	0	0	210	48	1	3	PCI	1	1	1	1	1	1.59452	0
851	0	1	81.8247	1	1	1	1	0	0	1313	46	1	3	PCI	1	1	1	1	1	2.98904	0
852	1	2	77.6959	0	0	0	1.2307	0	0	355	60	1	0	conservative	1	1	0	0	0	1.60822	0
853	1	1	59.126	0	0	1	0.8	0	0	175	76	1	1	PCI	1	1	1	1	1	2.97808	0
854	0	2	49.4301	0	0	1	0.9	0	0	1299	43	1	3	PCI	1	1	1	1	1	2.95068	0
855	0	2	63.9041	0	0	1	0.8	0	0	1985	75	1	1	PCI	1	1	1	1	1	1.32055	0
856	0	2	56.5096	1	0	1	1	0	0	175	78	1	1	PCI	1	1	1	1	0	1.14521	0
857	0	2	44.1836	0	0	1	1	0	0	6889	31	1	2	PCI	1	1	1	1	1	1.28493	0
858	0	1	86.6219	1	1	0	1.00517	0	0	2510	33	1	3	PCI	1	1	1	1	0	2.94247	0
859	0	2	72.2986	0	1	0	1	0	0	1286	45	1	1	PCI	1	1	1	1	0	1.47123	0
860	0	2	48.7945	1	0	1	0.8	0	0	4077	45	1	2	PCI	1	1	1	1	1	2.94521	0
861	0	2	45.2329	1	1	1	0.9	0	0	4987	68	1	1	PCI	1	1	1	1	1	1.07671	0
862	0	2	56.7041	1	0	1	1.32413	0	0	4079	50	1	1	PCI	1	1	1	1	1	1.25753	0
863	0	2	70.3342	0	1	0	0.79505	0	0	285	56	1	0	PCI	1	1	1	1	0	1.38356	0
864	1	1	82.7973	1	0	0	0.7	0	0	189	40	1	0	conservative	1	1	1	1	1	2.92329	0
865	0	1	72.4192	1	0	0	1.2	0	0	2015	49	1	3	PCI	1	1	1	1	0	2.60274	0
866	0	1	66.5836	1	1	0	1.09	0	0	1752	45	1	3	PCI	1	1	1	1	0	2.9726	0
867	0	1	81.5644	1	1	0	1.5	0	0	379	56	1	3	PCI	1	1	1	1	1	2.99726	0
868	1	1	78.9041	1	1	0	0.6	0	0	2186	54	1	3	PCI	1	1	1	1	0	1.32877	0
869	1	1	76.4822	1	0	0	1.1	0	0	449	45	1	3	PCI	1	1	1	1	1	2.87397	0
870	0	1	87.8219	1	0	0	0.8	0	0	1560	56	1	3	PCI	1	1	1	1	0	0.986301	0
871	0	2	63.0466	1	0	1	0.9	0	0	155	47	1	1	PCI	1	1	1	1	0	1.12877	0
872	0	2	93.3479	0	0	1	1.1	0	0	1007	56	1	2	PCI	0	0	0	0	0	1.41644	0
873	1	1	78.7041	1	0	1	0.7	0	0	103	68	1	1	PCI	1	1	1	1	0	2.82192	0
874	0	2	48.4301	1	1	1	0.9	0	0	2731	42	1	3	PCI	1	1	1	1	1	1.16712	0
875	1	2	80.526	1	1	0	1.4	0	1	121	42	1	2	conservative	1	1	1	1	0	2.80822	0
876	0	1	39.4986	0	0	1	0.8	0	0	995	52	1	1	PCI	1	1	1	1	0	2.86575	0
877	0	2	70.3863	0	1	1	0.6	0	0	403	20	1	3	PCI	1	1	1	1	1	1.18082	0
878	0	2	53.6466	1	0	1	0.9	0	0	3144	37	1	1	PCI	1	1	1	1	0	2.84658	0
879	1	1	77.0493	1	0	0	0.8	0	0	644	39	1	3	PCI	1	1	1	1	1	0.279452	1
880	1	2	76.3644	0	0	1	0.908589	0	1	5313.67	58	1	2	PCI	1	1	1	1	1	1.57808	0
881	0	1	56.3096	1	0	1	0.9	0	0	668	58	1	1	PCI	1	1	1	1	0	1.15068	0
882	0	2	35.4466	1	0	0	0.8	0	0	3921	55	1	3	PCI	1	1	1	1	0	2.87397	0
883	0	2	56.9425	0	0	1	0.8	0	0	2628	43	1	2	PCI	1	1	1	1	0	0.70411	1
884	1	1	69.2548	0	1	0	0.7	0	0	263	47	1	3	PCI	1	1	1	1	0	2.73973	0
885	0	2	57.3863	1	0	0	1.1	0	0	3371	60	1	1	PCI	1	1	1	1	0	1.10959	0
886	0	2	57.9178	1	0	1	0.8	0	0	1777	58	1	1	PCI	1	1	1	1	0	2.80548	0
887	1	2	84.0795	1	0	0	2.8	1	0	1230	30	1	3	PCI	1	1	1	1	0	1.24932	1
888	0	1	83.1205	1	0	0	2.6	0	0	273	73	1	3	PCI	1	1	1	0	1	2.81918	0
889	1	1	37.0575	0	0	1	0.7	0	0	307	64	1	1	PCI	1	1	1	1	0	2.82192	0
890	0	2	63.411	0	0	1	1	0	0	1149	59	1	2	PCI	1	1	1	1	0	2.7726	0
891	0	1	40.1753	1	0	1	1.1	0	0	961	64	1	2	PCI	1	1	1	1	0	2.8	0
892	0	2	46.5041	0	0	1	1.4	0	0	5178	30	1	2	PCI	1	1	0	0	1	1.11507	0
893	0	2	62.5205	1	0	1	0.9	0	0	723	57	1	1	PCI	1	1	1	1	1	2.7589	0
894	0	1	67.0466	1	0	0	0.9	0	0	262	54	1	3	PCI	1	1	1	1	0	1.13973	0
895	0	2	66.2192	1	0	0	1.1	0	0	720	43	1	2	PCI	1	1	1	0	1	2.75068	0
896	0	2	83.5397	0	1	0	1	0	0	1193	26	1	3	PCI	1	1	1	1	1	1.09041	1
897	0	2	52.4192	1	0	0	1.3	0	0	3624	25	1	2	PCI	1	1	1	1	1	2.8411	0
898	1	1	45.411	1	0	1	0.8	0	0	1943	40	1	1	PCI	1	1	1	1	1	1.31507	0
899	1	1	58.4575	1	0	0	0.5	0	0	564	44	1	0	conservative	1	1	1	1	1	0.0219178	0
900	0	2	53.874	0	1	1	0.6	0	0	614	61	1	3	PCI	1	1	1	1	1	2.64658	0
901	0	2	56.6	1	0	0	1.1	0	0	809	65	1	1	PCI	1	1	1	1	1	2.80548	0
902	0	2	60.1781	0	0	1	0.7	0	0	1528	60	1	2	PCI	1	1	1	0	0	2.12329	0
903	0	2	46.7589	1	0	1	0.9	0	0	636	52	1	2	conservative	1	1	1	1	0	2.70959	0
904	0	2	64.1123	1	0	1	1.4	0	0	1519	28	1	3	PCI	1	1	1	1	1	2.70959	0
905	0	2	56.3589	1	1	1	0.8	1	0	1135	50	1	3	PCI	1	1	1	1	0	0.610959	0
906	1	1	71.4959	1	0	1	1	0	0	839	44	1	3	PCI	1	1	1	1	0	1.41644	0
907	0	1	51.4411	1	1	0	0.9	0	0	2883	58	1	1	PCI	1	1	1	1	1	2.71781	0
908	0	1	56.0849	0	0	0	0.9	0	0	3807	55	1	2	PCI	1	1	1	1	1	2.68219	0
909	0	2	50.189	0	0	1	0.9	0	0	2127	32	1	2	PCI	1	1	1	1	1	2.67945	0
910	1	1	67.463	0	0	0	0.8	0	0	2834	46	1	1	PCI	1	1	1	1	0	2.67397	0
911	0	2	59.0822	1	1	1	0.9	0	0	5042	60	1	2	PCI	1	1	1	1	0	2.5726	1
912	1	1	56.337	1	1	0	4.6	0	0	336	43	0	0	conservative	1	1	1	1	0	1.18356	0
913	0	2	88.7945	1	1	0	1.6	0	1	219	36	1	3	PCI	1	1	1	1	1	0.120548	1
914	1	2	76.1479	1	0	0	0.9	0	0	506	50	1	0	conservative	0	1	1	1	0	2.55068	0
915	1	2	89.4356	1	0	0	2.8	0	1	725	24	0	0	conservative	0	1	0	1	0	0.353425	1
916	0	1	88.5288	0	0	0	1.2	0	0	205	40	1	3	PCI	1	1	1	1	1	1.35616	1
917	0	2	53.8247	1	0	1	0.9	0	0	5735	35	1	2	PCI	1	1	1	1	1	2.52603	0
918	0	2	71.9151	1	0	1	0.8	0	0	1939	63	1	2	PCI	1	1	1	1	1	1.14521	0
919	1	2	78.7507	1	1	0	2.7	0	1	640	29	0	0	conservative	1	1	1	1	1	0.882192	1
920	0	2	85.1479	1	0	0	1.2	1	0	1266	53	1	3	PCI	1	1	1	1	0	2.00274	0
921	0	2	39.2548	0	0	1	0.9	0	0	1827	52	1	1	PCI	1	1	1	1	0	1.07397	0
922	0	2	60.4192	1	1	1	1	1	0	1055	40	1	3	PCI	1	1	0	0	1	2.20274	1
923	0	2	63.0247	1	0	1	0.9	0	0	835	42	1	3	PCI	1	1	1	0	0	1.48493	0
924	1	1	69.063	0	0	0	0.7	0	0	496	63	1	1	PCI	1	1	1	1	0	1.0274	0
925	0	2	40.3644	0	0	1	1	0	0	505	68	1	1	PCI	1	1	1	1	0	2.60548	0
926	1	2	84.0822	1	0	1	0.6	0	1	1157	41	1	2	PCI	1	1	1	1	1	2.5726	0
927	1	1	77.2274	1	0	0	1	0	0	1053	54	1	2	PCI	1	1	1	1	0	1.64384	0
928	0	1	61.8192	0	0	1	0.9	0	0	1024	41	1	2	PCI	1	1	1	1	0	2.60822	0
929	0	2	75.1068	1	0	0	1	1	0	1923	50	1	3	PCI	1	1	1	1	1	2.56438	0
930	0	2	35.2658	0	0	1	0.9	0	0	861	59	1	1	PCI	1	1	1	1	0	1.3863	0
931	0	2	59.3589	0	0	1	0.8	0	0	980	55	1	1	PCI	1	1	1	1	0	1.8411	0
932	0	2	64.137	1	0	0	0.8	0	0	44	45	1	1	PCI	1	1	1	1	0	1.13973	0
933	1	1	58.137	0	0	1	0.7	0	0	2903	69	1	3	PCI	1	1	1	1	0	1.17534	0
934	1	1	80.5534	1	0	0	0.7	0	0	775	50	1	1	PCI	1	1	1	1	0	0.945205	0
935	1	2	82.4301	1	0	1	1.2	0	1	1010	45	1	3	PCI	1	1	1	1	1	1.22192	1
936	1	1	44.8164	1	0	1	0.6	0	0	4969	55	1	1	PCI	1	1	1	1	0	2.50959	0
937	0	1	66.3123	1	0	0	1.2	0	0	432	55	1	3	PCI	1	1	1	1	0	2.45205	0
938	0	1	70.611	0	0	0	0.8	0	0	571	65	1	1	PCI	1	1	1	1	0	2.39452	0
939	0	1	51.5589	0	0	1	0.8	0	0	5293	38	1	3	PCI	1	1	1	1	1	2.39726	0
940	0	2	66.7151	1	0	1	0.9	1	0	325	31	1	3	PCI	1	1	1	1	1	0.443836	1
941	0	1	84.4904	1	0	0	1.1	0	0	644	45	0	0	conservative	1	1	1	1	1	2.43836	0
942	1	1	76.2493	0	0	1	1	0	0	243	50	1	1	PCI	1	1	1	1	1	2.39178	0
943	0	2	51.989	0	0	0	0.8	0	0	456	55	1	1	PCI	1	1	1	1	0	1.77808	0
944	1	1	79.2603	1	1	0	1	0	0	381	30	1	3	PCI	1	1	1	1	1	2.45753	0
945	0	2	55.8493	1	0	0	2.3	0	0	6700	48	1	1	PCI	1	1	1	1	1	2.39726	0
946	1	2	82.7288	1	1	0	2	0	0	567	18	1	3	PCI	1	1	1	1	0	1.88767	1
947	1	1	67.7315	1	1	1	0.7	0	0	1715	50	1	2	PCI	1	1	1	1	0	2.49589	0
948	0	2	69.7288	1	0	0	1.8	1	1	365	42	1	3	PCI	1	1	1	1	1	2.46301	0
949	0	1	71.2986	1	1	0	1.2	0	0	4505	44	1	2	PCI	1	1	1	1	0	2.43288	0
950	0	2	59.3425	1	0	1	1.1	0	0	3635	70	1	3	PCI	1	1	1	1	0	2.39726	0
951	0	1	66.1151	1	0	0	1	0	0	370	53	1	2	PCI	1	1	1	1	1	1.76438	0
952	0	2	61.6877	0	0	1	0.9	0	0	1650	62	1	2	PCI	1	1	1	1	1	2.4	0
953	0	2	61.2164	0	1	1	1.1	1	0	6595	30	1	2	PCI	1	1	1	1	1	2.4137	0
954	0	1	72.0384	1	0	0	1.4	0	0	1327	60	1	3	PCI	1	1	1	1	0	2.38082	0
955	0	2	56.4384	1	0	1	0.5	0	0	1268	55	1	2	PCI	1	1	1	1	1	2.48219	0
956	0	2	71.8575	1	0	0	1.2	1	0	5237	34	1	1	PCI	1	1	1	1	1	1.90959	0
957	1	1	74.9973	1	0	0	1.3	0	0	481	54	1	2	PCI	1	1	1	1	0	2.41096	0
958	1	1	79.1781	1	0	0	1.1	0	0	736	56	1	3	PCI	1	1	1	1	0	2.3589	0
959	0	1	80.6767	1	0	1	1.5	0	0	436	58	1	2	PCI	1	1	1	1	0	2.43562	0
960	1	1	50.1781	1	0	0	0.9	0	0	234	46	1	3	PCI	1	1	1	1	1	1.38904	0
961	0	1	48.0904	0	0	1	0.8	0	0	5015	40	1	2	PCI	1	1	1	1	1	2.44932	0
962	1	1	67.9781	1	0	0	0.7	0	0	1847	38	1	1	PCI	1	1	1	1	0	2.46575	0
963	1	1	78.0356	1	1	0	1.2	0	0	741	54	1	3	PCI	1	1	1	1	0	2.4	0
964	0	2	49.9671	0	1	1	0.7	0	0	1365	49	1	1	PCI	1	1	1	1	0	2.4137	0
965	1	1	80.0822	1	1	0	1.3	1	0	322	39	1	3	PCI	1	1	1	1	1	2.33151	0
966	1	1	47.8849	0	0	1	0.7	0	0	910	60	1	1	PCI	1	1	1	1	0	2.36164	0
967	0	1	52.8877	0	0	0	1.1	0	0	1076	60	1	1	CABG	1	1	1	1	0	1.41918	0
968	0	1	76.4027	1	0	0	1.6	0	1	3307	45	1	3	PCI	1	1	1	1	1	1.17808	0
969	0	1	80.3836	1	0	0	1	0	0	917	46	1	3	PCI	1	1	1	1	1	2.37808	0
970	0	2	46.9534	0	0	0	0.5	0	0	2050	32	1	1	PCI	1	1	1	0	1	2.37534	0
971	0	2	48.7781	1	0	0	1	0	0	11137	43	1	3	PCI	1	1	1	1	1	0.682192	1
972	0	2	70.9096	1	0	1	1.3	0	0	519	46	1	1	PCI	1	1	1	1	1	1.67671	0
973	0	2	57.2164	0	0	0	0.8	0	0	479	49	1	1	PCI	1	1	1	1	1	2.35342	0
974	0	2	78.3342	1	0	0	1.1	1	0	524	76	1	2	conservative	1	1	1	1	0	2.27671	0
975	0	2	47.811	0	0	1	1	0	0	283	57	1	1	PCI	1	1	1	1	0	2.34521	0
976	1	1	79.5589	1	0	0	0.9	0	0	523	45	1	1	PCI	1	1	1	1	1	0.123288	1
977	1	1	84.8027	1	1	0	0.9	0	0	163	38	1	2	PCI	1	1	1	1	0	2.36164	0
978	0	1	70.6466	1	0	0	0.9	0	0	1688	54	1	3	PCI	1	1	1	1	0	2.1589	0
979	0	2	42.6274	0	0	1	1.3	0	0	3327	58	1	1	PCI	1	1	0	1	0	2.27123	0
980	0	2	48.7836	1	0	0	1	0	0	599	52	1	3	PCI	1	1	0	1	0	2.26301	0
981	0	2	53.2767	1	0	1	0.7	0	0	831	60	1	1	PCI	1	1	1	1	0	2.25479	0
982	0	2	64.5425	1	0	0	0.7	1	0	247	51	1	3	PCI	1	1	1	1	1	1.53973	0
983	0	2	68.0658	0	0	0	1.2	0	0	2269	30	1	1	PCI	1	1	1	1	1	2.2137	0
984	0	2	44.9781	0	0	1	0.8	0	0	12481	68	1	1	PCI	1	1	1	1	1	2.2274	0
985	0	2	32.4247	1	0	0	0.9	0	0	189	43	1	1	PCI	1	1	1	1	0	2.2411	0
986	0	2	73.3425	0	0	0	1.1	0	0	937	60	1	3	PCI	1	1	1	1	0	2.13425	0
987	0	2	64.8959	1	0	0	1	0	0	949	61	1	1	PCI	1	1	1	1	0	2.35616	0
988	0	1	78.0137	1	1	0	1.2	0	0	3584	39	1	1	PCI	1	1	1	1	1	2.2	0
989	0	2	52.1699	0	0	0	0.8	0	0	2953	50	1	2	PCI	1	1	1	1	1	2.16438	0
990	0	1	63.0247	1	1	0	1	0	0	750	51	1	1	PCI	1	1	1	1	0	2.16986	0
991	0	1	51.3863	1	0	0	0.9	0	0	2595	59	1	2	PCI	1	1	1	1	1	2.16164	0
992	1	1	57.6603	1	0	0	0.9	1	0	1908	60	1	2	PCI	1	1	1	1	1	2.16986	0
993	1	1	90.7918	1	0	0	2	0	0	1290	45	0	0	conservative	1	1	1	1	1	2.14247	0
994	0	1	73.1616	1	0	0	1.4	0	0	1123	54	1	1	PCI	1	1	1	1	0	2.18904	0
995	0	2	61.126	1	0	1	0.9	0	0	1657	40	1	2	PCI	1	1	1	1	0	2.12877	0
996	0	2	81.6329	1	1	1	1	0	0	2207	38	1	1	PCI	1	1	1	1	1	1.46301	1
997	0	1	76.4027	1	0	0	1	0	0	754	40	1	1	PCI	1	1	1	1	0	2.08767	0
998	1	2	81.9507	1	0	0	1	0	1	234	65	1	0	conservative	1	1	1	1	0	2.02466	0
999	1	1	64.9753	1	0	1	0.7	0	0	1003	58	0	0	conservative	1	1	1	1	0	0.846575	0
1000	0	2	66.4329	1	0	1	1.4	0	1	4161	45	1	2	PCI	1	1	1	0	1	2.10959	0
1001	1	1	76.8986	1	0	1	0.8	0	0	544	50	1	1	PCI	1	1	1	1	1	2.04658	0
1002	0	1	65.8548	1	0	0	0.9	0	0	4070	49	1	2	PCI	1	1	1	1	1	2.0411	0
1003	1	1	60.4082	1	0	1	0.8	0	0	637	52	1	3	PCI	1	1	1	1	0	0.887671	0
1004	0	2	64.6219	1	0	0	0.7	0	0	1176	32	1	0	Lysis	1	1	1	1	0	2	0
1005	0	1	84.011	1	0	0	1	0	0	746	53	1	3	PCI	1	1	1	1	0	2.09315	0
1006	0	1	57.5753	0	0	0	1	0	0	752	58	1	1	PCI	1	1	1	1	1	2.02192	0
1007	1	1	72.8904	0	0	0	0.8	0	0	603	60	1	1	PCI	1	1	1	1	0	2.05753	0
1008	0	2	67.4932	1	0	0	1.1	0	0	600	58	1	1	PCI	1	1	1	1	1	2.04384	0
1009	1	1	70.2849	1	0	0	0.7	0	0	333	61	1	1	PCI	1	1	1	1	1	2.06301	0
1010	0	2	58.7479	1	0	1	1	1	0	395	36	1	3	CABG	1	1	1	1	0	2.06575	0
1011	0	2	82.2767	1	1	0	2	0	1	331	48	0	0	conservative	1	1	1	1	1	1.97534	0
1012	1	1	56.9233	0	0	1	0.9	0	0	204	67	1	1	PCI	1	1	1	0	0	1.99178	0
1013	1	1	86.4548	0	0	0	1	0	0	260	43	1	1	PCI	1	1	0	1	1	2.09041	0
1014	0	1	76.1973	0	0	0	1.2	0	0	3264	51	1	2	PCI	1	1	1	1	0	2.07671	0
1015	0	1	76.9863	1	0	0	1.1	0	0	861	49	1	0	PCI	1	1	1	1	1	2.04932	0
1016	0	1	71.4493	1	1	0	1.2	0	0	3865	65	1	2	PCI	1	0	1	1	1	1.94521	0
1017	0	2	64.1918	0	0	0	0.9	0	0	1247	49	1	1	PCI	1	1	1	1	1	1.97534	0
1018	0	1	84.0137	1	1	0	1.2	0	0	587	53	1	2	PCI	1	1	1	1	0	1.21096	0
1019	1	1	63.3534	1	0	1	1.3	0	0	736	44	1	1	PCI	1	1	1	1	0	1.9726	0
1020	0	2	77.737	1	0	0	0.9	1	0	347	46	1	3	PCI	1	1	1	0	0	1.99726	0
1021	0	2	51.2849	1	0	1	0.8	0	0	1582	68	1	3	PCI	1	1	1	1	0	1.88219	0
1022	1	1	67.3397	1	0	0	0.6	0	0	3577	53	1	3	PCI	1	1	1	1	1	1.99178	0
1023	0	2	40.5808	1	0	0	1.2	0	0	4651	53	1	2	PCI	1	1	1	0	1	1.87671	0
1024	0	2	50.9699	0	0	1	0.9	0	0	10578	30	1	1	PCI	1	1	0	1	1	1.90411	0
1025	1	1	65.8082	1	0	0	0.7	0	0	281	60	1	1	conservative	1	1	1	1	0	1.96986	0
1026	0	2	38.5315	0	0	1	0.7	0	0	1503	33	1	1	PCI	1	1	1	1	1	0.558904	0
1027	1	1	51.5699	0	0	1	0.8	0	0	221	57	1	2	PCI	1	1	1	1	1	1.95616	0
1028	0	2	59.1041	0	0	1	0.6	0	0	803	49	1	1	PCI	1	1	1	1	0	1.92603	0
1029	0	2	57.7671	0	0	1	0.9	0	0	292	50	1	2	PCI	1	1	1	1	0	1.89589	0
1030	0	1	50.4274	1	1	1	0.8	0	0	8296	42	1	2	PCI	1	1	1	0	1	1.54795	0
1031	1	1	58.4795	1	0	1	0.8	0	0	924	58	1	2	PCI	1	1	1	1	1	1.89589	0
1032	0	2	47.4247	1	0	1	0.8	0	0	5009	44	1	2	PCI	1	1	1	1	1	1.89863	0
1033	1	1	82.4493	1	0	1	0.7	0	0	2825	36	1	2	PCI	1	1	1	1	0	1.78904	0
1034	0	1	66.3041	1	1	0	1.3	0	0	2245	48	1	3	PCI	1	1	1	1	0	1.89315	0
1035	0	2	60.2384	0	0	1	1.1	1	0	2524	41	1	3	PCI	1	1	1	1	1	1.88767	0
1036	0	1	64.6027	1	0	0	1	0	0	1941	38	1	2	PCI	1	1	1	1	0	1.26301	0
1037	0	2	56.8219	1	0	1	1.4	0	0	358	52	1	2	PCI	1	1	1	1	0	1.89863	0
1038	1	1	61.926	0	0	0	0.7	0	0	1639	61	1	2	PCI	1	1	1	1	0	1.78356	0
1039	0	2	56.4438	0	0	1	1.2	0	0	4388	32	1	1	PCI	1	1	1	1	0	1.8	0
1040	1	1	44.0027	0	0	1	0.6	0	0	615	61	1	1	PCI	1	1	0	1	0	1.85479	0
1041	0	2	54.8274	0	0	0	1	0	0	4165	45	1	1	PCI	1	1	1	1	0	1.56712	0
1042	0	2	47.8959	1	0	0	0.9	0	0	3997	56	1	1	PCI	1	1	1	1	1	1.72603	0
1043	0	1	56.0849	1	1	1	0.8	0	0	936	50	1	3	PCI	1	1	1	1	0	1.83288	0
1044	0	2	68.8411	1	0	1	0.8	0	0	4601	27	1	1	PCI	1	1	1	1	1	1.09863	0
1045	1	1	77.9671	1	1	0	2.3	0	0	430	60	1	3	PCI	1	1	0	1	1	1.82192	0
1046	0	1	55.6192	1	0	1	1	0	0	771	58	1	1	PCI	1	0	0	1	0	1.53151	0
1047	0	2	55.5507	1	0	1	0.7	0	0	1286	56	1	1	PCI	1	1	1	1	0	1.83562	0
1048	0	1	73.411	0	1	1	1.2	0	0	1865	61	1	3	PCI	1	1	1	1	0	1.76438	0
1049	0	2	64.2795	0	0	1	0.9	0	0	3629	45	1	3	PCI	1	1	0	1	0	1.18082	0
1050	1	1	60.9452	0	0	1	0.8	0	0	561	65	1	2	PCI	1	0	1	1	0	1.79452	0
1051	0	2	43.2904	1	0	1	1.1	0	0	1285	52	1	2	PCI	1	1	1	1	0	1.78082	0
1052	0	2	70.2849	0	0	0	1.3	0	0	1063	58	1	1	PCI	1	1	1	1	0	0.40274	1
1053	0	2	71.3123	0	0	0	0.9	0	0	1307	54	1	1	PCI	1	1	1	1	0	1.76986	0
1054	1	1	80.0849	1	0	0	1.2	0	0	832	62	1	3	PCI	1	1	1	1	1	1.68767	0
1055	0	2	55.5836	1	0	0	0.8	0	0	8147	19	1	1	PCI	1	1	1	1	1	1.71781	0
1056	0	2	61.0548	0	0	1	1.2	0	0	2771	56	1	1	PCI	1	1	1	1	1	1.06849	0
1057	1	1	75.2904	1	0	0	0.7	0	0	129	28	1	2	PCI	1	1	1	1	1	1.54795	0
1058	1	1	68.1397	1	0	0	0.9	0	0	180	66	1	2	PCI	1	1	1	1	0	1.72329	0
1059	0	2	40.1178	0	0	1	0.8	0	0	564	65	1	1	PCI	1	1	0	1	0	1.67123	0
1060	1	1	53.2247	1	1	1	0.8	0	0	2673.91	66	1	1	PCI	1	1	1	1	0	1.68219	0
1061	0	2	48.989	1	0	1	1	1	0	9977	21	1	2	PCI	1	1	1	1	1	0.605479	1
1062	1	1	71.8438	1	0	0	1	0	0	5424	39	1	1	PCI	1	1	1	1	1	1.73699	0
1063	0	1	80.9452	1	0	0	1.2	0	1	4055	45	1	3	PCI	1	1	1	1	1	1.60822	0
1064	0	1	75.5068	1	0	0	1.5	0	0	3934	25	1	3	PCI	1	1	1	1	1	1.66301	0
1065	0	2	82.9479	0	1	1	1.3	0	1	1054	68	1	1	PCI	1	1	1	1	0	4.09315	1
1066	1	1	70.9342	1	0	0	1	0	0	2300	59	1	2	PCI	1	1	1	1	1	4.48493	0
1067	0	2	46.0849	1	0	1	1.2	0	0	3320	45	1	3	PCI	1	1	1	1	0	4.69041	0
1068	0	2	75.2164	0	1	0	1.6	0	1	258	21	1	3	PCI	1	1	1	1	1	0.2	1
1069	0	2	45.0329	0	0	1	1.1	0	0	1844	54	1	2	PCI	1	1	1	1	0	5	0
1070	0	2	52.6548	1	1	1	1.1	0	0	458	49	1	1	PCI	1	1	1	1	1	4.40548	0
1071	1	1	61.1507	1	1	0	1.1	0	0	1996	74	1	2	PCI	1	1	1	1	1	5	0
1072	0	2	71.1781	1	1	1	1.4	0	1	262	48	1	2	Lysis	1	1	1	1	1	3.94247	0
1073	0	1	70.1397	1	0	0	1.3	0	0	456	71	1	3	PCI	1	1	1	1	0	3.7726	0
1074	1	1	52.8082	1	0	1	0.8	0	0	522	75	1	3	PCI	1	1	1	1	1	5	0
1075	0	2	51.4384	1	0	1	1.0901	0	0	280	70	1	1	PCI	1	1	1	1	0	3.74795	0
1076	0	2	72.7562	1	1	1	0.9	1	0	460	61	1	2	PCI	1	1	1	1	0	1.01644	1
1077	1	1	76.0274	1	0	0	0.9	0	0	436	69	1	1	PCI	1	1	1	1	1	3.83562	0
1078	1	1	72.1315	1	0	0	1.2	0	0	1960	45	1	3	PCI	1	1	1	1	1	3.77534	0
1079	0	2	71.1753	1	1	0	1.54322	0	1	3454	67	1	2	PCI	1	1	1	1	0	4.39726	0
1080	1	1	63.3041	1	0	1	0.9	0	0	1354	57	1	1	PCI	1	1	1	1	0	4.44384	0
1081	1	1	68.8877	1	0	0	1	0	0	216	72	1	1	PCI	1	1	1	1	0	4.43014	0
1082	0	1	76.7479	1	0	0	1.6	0	0	2360	48	1	3	PCI	1	1	1	1	1	3.76986	0
1083	1	2	29.2986	1	0	1	0.8	0	0	792	67	1	1	PCI	1	1	1	1	0	0.539726	0
1084	0	1	75.926	1	0	0	1.3	0	0	2396	58	1	1	PCI	1	1	1	1	1	5	0
1085	0	2	70.4137	1	0	0	1.5	1	0	792	69	1	2	PCI	1	1	1	1	1	5	0
1086	1	2	67.0164	0	1	0	1.62855	0	0	3666.94	23	1	3	PCI	1	1	1	1	0	0.00273973	0
1087	0	2	52.2301	1	0	0	1.2	0	0	7106	65	1	1	PCI	1	1	1	1	0	4.34247	0
1088	0	1	70.6137	0	0	0	1.3	0	0	1364	48	1	3	PCI	1	1	1	1	1	3.76986	0
1089	0	2	66.8603	1	1	0	1.33266	1	1	626	44	1	2	PCI	1	1	1	1	1	3.3863	1
1090	0	2	52.9507	1	1	1	1.1	0	0	1272	52	1	2	PCI	1	1	1	1	1	5	0
1091	0	1	69.9973	1	0	0	1.4	0	0	244	40	1	3	PCI	1	1	1	1	1	3.72603	0
1092	0	2	52.6219	1	0	0	1.1	1	0	1318	56	1	3	Lysis	1	1	1	1	0	5	0
1093	1	1	30.6192	0	0	1	0.8	0	0	700	52	1	1	PCI	1	1	1	1	0	5	0
1094	1	1	45.8877	1	0	0	1.1	0	0	2100	52	1	2	PCI	1	1	1	1	1	4.30137	0
1095	0	2	64.8192	1	0	1	1.8	0	0	1338	51	1	2	PCI	1	1	1	1	0	4.27397	0
1096	0	2	55.6795	1	0	0	1.2	0	0	984	53	1	2	PCI	1	1	1	1	1	4.30685	0
1097	0	1	72.3808	1	0	0	1.6	0	0	602	50	1	2	PCI	1	1	1	1	0	1.18904	1
1098	0	1	76.0274	1	0	0	1.49969	0	0	816	62	1	2	PCI	1	1	1	1	0	3.95342	0
1099	0	2	60.7288	1	1	1	1.2	0	0	5082	52	1	3	PCI	1	1	1	1	0	4.28493	0
1100	0	2	56.7151	1	0	1	1.4	0	0	2110	48	1	1	PCI	1	1	1	1	1	4.39726	0
1101	0	1	70	0	1	0	1.3	0	0	1776	35	1	1	PCI	1	1	1	1	1	3.69863	0
1102	1	1	53.463	1	1	1	1.8	0	0	1634	72	1	3	PCI	1	1	1	1	0	3.62466	0
1103	0	1	61.5041	1	0	0	1.1	0	0	1544	59	1	3	PCI	1	1	1	1	0	4.35342	0
1104	1	1	73.6986	1	1	0	1.1	0	0	400	46	1	3	PCI	1	1	1	1	1	3.74521	0
1105	0	1	75.7918	1	0	0	1.1	0	0	650	38	1	2	PCI	1	1	1	1	1	4.84658	0
1106	1	1	76.4877	1	0	0	2.17106	0	0	1936	57	1	3	PCI	1	1	1	1	1	3.19452	1
1107	0	2	67.7068	0	1	0	1.2	0	0	954	58	1	3	PCI	1	1	1	1	1	3.64658	0
1108	0	2	47.0712	0	0	1	1.1	0	0	2080	49	1	1	PCI	1	1	1	1	0	5	0
1109	0	2	62.811	1	0	1	1.3	0	0	80	70	1	1	PCI	1	1	1	1	0	3.50137	0
1110	0	2	67.0219	1	0	0	1.1	0	0	1048	47	1	1	PCI	1	1	1	1	0	3.58904	0
1111	1	2	40.8164	1	0	0	1.1	0	0	810	64	1	1	conservative	1	1	1	1	0	3.48767	0
1112	0	2	43.3397	0	0	1	1.1	0	0	528	40	1	2	PCI	1	1	0	1	1	5	0
1113	0	2	64.4904	1	0	1	1.1	0	0	1104	73	1	3	PCI	1	1	1	1	0	4.20822	0
1114	0	1	86.4	1	0	0	1.9	0	0	1324	47	1	3	PCI	1	1	1	1	1	0.290411	1
1115	1	1	68.263	1	1	0	1.1	0	0	216	32	1	3	PCI	1	1	1	1	1	1.31507	1
1116	0	2	78.3781	1	1	1	0.763505	0	0	516	61	1	3	conservative	1	1	1	1	1	4.30959	0
1117	1	1	78.7014	1	1	0	1.68363	0	1	6300	54	1	3	PCI	1	1	1	0	0	0.482192	1
1118	0	2	55.2356	1	0	0	1.4	0	0	878	53	1	2	PCI	1	1	1	1	0	3.58082	0
1119	1	1	59.4466	1	0	1	0.9	0	0	3480	44	1	1	PCI	1	1	1	1	1	5	0
1120	0	2	49.5425	0	0	1	1.5	0	0	1372	58	1	2	PCI	1	1	1	1	1	3.55068	0
1121	0	2	59.863	0	1	1	1.2	0	0	2620	47	1	3	PCI	1	1	1	1	0	3.6274	0
1122	1	1	60.3425	1	0	0	1.4	1	0	1564	59	1	3	PCI	1	1	1	1	0	5	0
1123	1	1	77.9425	1	1	0	1	0	0	992	58	1	3	PCI	1	1	1	1	1	5	0
1124	1	1	80.9315	1	0	0	0.9	0	0	1598	54	1	3	PCI	1	1	1	1	1	3.56986	0
1125	0	1	39.5123	1	0	1	1.7	0	0	1438	58	1	1	PCI	1	1	1	1	1	3.77808	0
1126	0	1	57.5753	0	0	0	1.2	0	0	658	70	1	3	PCI	1	1	1	1	0	4.16438	0
1127	0	1	60.2986	1	0	1	1.2	0	0	2760	52	1	2	PCI	1	1	1	1	0	3.56986	0
1128	0	1	70.0219	1	0	0	1.5	0	0	1248	55	1	2	PCI	1	1	1	0	1	3.60548	0
1129	0	1	86.2	1	0	0	0.930394	0	1	386	55	1	2	PCI	1	1	1	1	1	4.16164	0
1130	0	1	67.7534	1	0	0	1.3	0	0	232	76	1	3	PCI	1	1	1	1	0	4.13973	0
1131	0	1	69.1726	0	0	1	1.4	0	0	1316	51	1	3	PCI	1	1	1	1	0	3.60274	0
1132	1	2	89.7726	1	0	0	2	0	0	560	63	1	0	conservative	1	1	1	1	1	0.958904	1
1133	0	2	52.8877	0	0	1	1.2	0	0	1050	51	1	0	PCI	1	1	1	1	0	4.19726	0
1134	0	2	57.0466	1	0	1	1	0	0	1284	52	1	1	PCI	1	1	1	1	0	5	0
1135	0	1	73.074	1	0	0	1.7	0	0	1152	49	1	3	PCI	1	1	1	1	1	4.15068	0
1136	0	2	46.9233	1	0	0	1.5	0	0	818	67	1	1	PCI	1	1	1	1	0	3.37808	0
1137	0	2	56.9973	0	0	0	1.3	0	0	2026	39	1	1	PCI	1	1	1	1	1	4.18082	0
1138	0	1	72.663	1	1	0	1.5	0	0	1398	58	1	2	PCI	1	1	1	1	0	3.52603	0
1139	0	2	51.3808	1	0	0	1.2	0	0	1340	60	1	1	PCI	1	1	1	1	0	4.12055	0
1140	0	2	68.3397	0	0	1	1.3	0	0	330	22	1	1	PCI	1	1	1	1	1	3.49589	0
1141	1	1	69.0274	1	0	0	1.4	0	0	616	65	1	3	PCI	1	1	1	1	0	5	0
1142	0	2	42.3644	0	0	1	1.3	0	0	1136	67	1	3	PCI	1	1	1	1	0	5	0
1143	0	2	67.1671	1	0	0	1	1	0	866	55	1	3	PCI	1	0	1	1	0	5	0
1144	0	2	36.2603	1	0	1	1.1	0	0	940	46	1	1	PCI	1	1	1	1	1	4.11233	0
1145	0	2	54.2	1	1	1	1.5	0	0	1986	59	1	2	PCI	1	1	1	1	1	3.55068	0
1146	1	1	84.0658	0	0	0	1.4	1	0	450	50	1	1	PCI	1	1	1	1	0	4.11233	0
1147	0	1	68.0027	1	1	0	1.52505	0	0	1632	42	1	3	PCI	1	1	1	1	0	4.08493	0
1148	1	2	77.1945	0	1	0	1.61486	0	0	1538	67	1	3	PCI	1	1	1	1	0	4.16986	0
1149	0	2	68.7397	1	0	1	1.4	0	0	1540	60	1	3	CABG	1	1	1	0	0	5	0
1150	1	1	86.4685	1	0	0	0.9	0	1	1564	53	1	3	PCI	1	1	1	1	0	4.08767	0
1151	0	1	61.7014	1	0	1	1.6	0	0	372	65	1	2	PCI	1	1	1	1	0	4.07123	0
1152	0	2	54.5808	1	0	1	1.2	0	0	2340	65	1	1	PCI	1	1	1	1	1	4.09041	0
1153	0	2	60.4795	1	0	1	1.3	1	0	1274	58	1	2	PCI	1	1	1	1	0	3.41096	0
1154	0	1	70.6082	1	1	0	1.6	1	0	1530	38	1	3	PCI	1	1	1	1	1	5	0
1155	0	2	54.9014	1	1	0	1.3	0	0	4420	51	1	2	PCI	1	1	1	1	1	3.31507	0
1156	0	1	72.9945	1	1	0	1.5	0	0	6580	45	1	1	PCI	1	1	1	1	1	3.54795	0
1157	0	2	60.3315	1	0	1	1.2	1	0	374	67	1	3	PCI	1	1	1	1	1	5	0
1158	0	1	65.6356	1	1	0	1.2	0	0	328	49	1	3	PCI	1	1	1	1	0	3.36164	0
1159	0	2	44.5699	0	1	0	1.3	0	0	1976	54	1	1	PCI	1	1	1	1	0	5	0
1160	1	1	57.389	1	0	1	1	0	0	1230	63	1	1	PCI	1	1	1	1	0	4.10137	0
1161	0	2	45.3425	1	0	1	1.2	0	0	1492	66	1	1	PCI	1	1	1	1	0	4.0411	0
1162	0	1	71.9507	1	0	0	1.71383	0	0	602	58	1	2	PCI	1	1	1	0	0	3.43562	0
1163	0	2	76.7589	1	0	0	1.60861	1	0	365.494	42	1	3	PCI	1	1	1	1	0	1.56986	1
1164	1	1	77.5151	1	0	0	0.974161	0	0	328	55	1	3	PCI	1	1	1	1	0	3.50959	0
1165	0	2	40.8712	1	0	1	1.1	0	0	134	54	1	1	PCI	1	1	1	1	0	3.24932	0
1166	1	1	66.0658	0	0	0	1.16182	0	0	9686	41	1	1	PCI	1	1	1	1	1	4.78082	0
1167	0	1	59.8137	1	1	0	0.680766	0	0	236	64	1	2	PCI	1	1	1	1	0	1.23288	1
1168	0	1	59.6767	1	1	0	1.2	0	0	1666.32	46	1	2	PCI	1	1	1	1	1	4.0411	0
1169	0	1	64.1726	1	0	0	1.3	0	0	1004	57	1	2	PCI	1	1	1	1	0	5	0
1170	0	2	56.5151	0	0	1	1.86114	0	0	310	55	1	2	PCI	1	1	1	1	0	4.00274	0
1171	0	2	58.2685	1	0	0	1.3	0	0	3480	46	1	1	PCI	1	1	1	1	1	3.44932	0
1172	0	2	51.7863	0	0	0	1.3	0	0	1460	58	1	1	PCI	1	1	1	1	0	3.39178	0
1173	0	2	67.7836	1	0	0	1	1	0	440	54	1	3	PCI	1	1	1	1	1	3.27397	0
1174	0	2	55.526	1	1	0	1.3	0	0	2260	70	1	1	PCI	1	1	1	1	0	3.53973	0
1175	1	1	59.1288	1	0	0	1.30102	0	0	924	69	1	1	PCI	1	1	1	1	0	3.26301	0
1176	0	1	61.1781	1	1	0	1.1	0	0	743.6	58	1	1	PCI	1	1	1	1	0	5	0
1177	1	1	61.0658	1	0	0	1.2	0	0	828	64	1	3	PCI	1	1	1	1	0	3.98904	0
1178	0	2	65.0466	1	0	1	1	0	0	1436	58	1	1	PCI	1	1	1	1	0	3.96164	0
1179	1	2	71.074	0	1	1	1.5	0	1	1956.08	33	1	3	PCI	1	1	1	1	1	0.841096	1
1180	0	2	43.7699	1	1	1	1.2	0	0	496	72	1	2	PCI	1	1	1	1	0	5	0
1181	0	2	81.0466	1	1	1	1.3	0	0	304	62	1	3	PCI	1	1	1	1	1	3.37534	0
1182	0	2	72.389	1	0	0	1.80317	0	0	1392	38	1	3	PCI	1	1	1	0	1	4.00274	0
1183	1	1	83.3041	1	0	0	1	0	1	800	35	1	1	PCI	1	1	1	1	1	1.50137	1
1184	0	2	44.2548	1	1	1	1.2	0	0	1836	47	1	1	PCI	1	1	1	1	0	5	0
1185	1	1	58.1205	0	0	0	1.38919	1	0	422	62	1	3	PCI	0	0	0	0	0	3.07671	0
1186	0	2	53.2329	1	0	0	1.3	0	0	1990	51	1	2	PCI	1	1	1	1	0	5	0
1187	1	1	75.3014	1	0	0	1.5	0	1	1734	39	1	0	PCI	1	1	1	0	1	5	0
1188	0	2	49.2767	0	0	1	1.1	0	0	1116	50	1	1	PCI	1	1	1	1	0	4.18082	0
1189	0	1	60.2247	1	0	1	1.3	0	0	1316	40	1	2	PCI	1	1	1	1	1	5	0
1190	1	1	74.5753	1	1	0	1.34554	0	0	304	49	1	1	PCI	1	1	1	1	0	1.29315	1
1191	0	2	72.863	1	0	1	1.1	0	0	439	64	1	3	PCI	1	0	1	1	1	1.38356	0
1192	0	2	88.526	1	0	0	0.96023	0	1	812	49	1	3	PCI	1	1	1	1	1	0.69589	1
1193	1	1	64.7507	0	0	0	1	0	0	1714	41	1	1	PCI	1	1	1	1	1	4.66849	0
1194	1	1	58.0082	1	1	1	1	0	0	2446	39	1	3	PCI	1	1	1	1	1	3.38356	0
1195	0	2	42.5288	0	0	0	1.2	0	0	3280	54	1	1	PCI	1	1	1	1	0	3.91233	0
1196	0	2	40.6384	0	0	1	3.2	0	0	4184.93	38	1	2	PCI	1	1	1	1	1	3.90137	0
1197	1	1	71.3452	1	1	0	2	1	0	516	52	1	2	PCI	1	1	1	1	1	3.29041	0
1198	0	2	59.8137	1	1	1	1	0	0	2560	73	1	1	PCI	1	1	1	1	1	3.88493	0
1199	0	1	66.3836	0	0	0	0.738434	0	0	380	48	1	3	PCI	1	1	1	1	0	3.19726	0
1200	1	1	86.9781	0	0	0	0.9	0	0	2340	48	1	1	PCI	1	1	1	1	0	3.1863	0
1201	0	2	68.8986	0	1	1	1.4	1	0	3140	42	1	3	PCI	1	1	1	1	1	4.31781	1
1202	0	2	49.8301	0	1	1	1.6	0	0	784	48	1	3	PCI	1	1	1	1	1	3.87123	0
1203	0	2	83.2164	1	0	0	1.2	0	1	3260	67	1	3	PCI	1	1	1	1	1	3.87397	0
1204	0	2	66.2027	1	0	1	1.38424	0	1	344	75	1	1	PCI	1	1	1	1	0	3.86575	0
1205	1	1	81.2411	1	1	0	0.9	0	0	222	52	1	1	PCI	1	1	1	1	0	3.9726	0
1206	1	2	37.3479	1	1	1	0.9	0	0	494	34	1	1	PCI	1	1	1	1	0	3.31781	0
1207	0	2	43.4219	1	0	1	1.1	0	0	3552	50	1	2	conservative	1	1	1	1	1	3.28219	0
1208	0	2	36.7096	1	0	1	1.2	0	0	6460	33	1	1	PCI	1	1	1	1	1	3.24658	0
1209	0	1	53.4027	1	0	0	1.16865	0	0	1200	72	1	3	PCI	1	1	1	1	0	3.04932	0
1210	0	1	59.5342	1	0	0	1.2	0	0	730	68	1	3	PCI	1	1	1	1	0	3.1863	0
1211	0	1	57.6466	1	0	0	1.1	0	0	1116	64	1	1	PCI	1	1	1	1	1	3.16438	0
1212	0	2	57.0795	1	0	1	1.2	0	0	1332	58	1	3	PCI	1	1	1	1	0	5	0
1213	1	1	79.137	0	0	0	0.9	0	0	1842	55	1	3	PCI	1	1	1	1	1	3.8274	0
1214	0	2	46.8438	0	0	1	1.1	0	0	1890	58	1	1	PCI	1	1	1	1	0	3.80548	0
1215	0	2	54.7589	1	0	0	1.3	0	0	558	57	1	1	PCI	1	1	1	1	1	3.87671	0
1216	0	2	56.926	1	0	1	1.29387	0	0	4170	45	1	2	conservative	1	1	1	1	0	3.98904	0
1217	0	1	73.526	1	1	1	1.2	0	0	1526	68	1	2	PCI	1	1	1	1	1	1.29589	1
1218	0	2	60.4082	0	0	0	1.4	0	0	910	28	1	2	PCI	1	1	1	1	1	3.40548	0
1219	1	1	68.7068	1	0	1	0.7	0	0	5509.34	47	1	3	PCI	1	1	1	1	1	5	0
1220	1	2	70.3699	1	1	1	1.5	1	1	3340	34	1	3	PCI	1	1	1	1	1	3.79452	0
1221	0	2	70.5425	1	0	1	1.2	1	0	1566	21	1	3	PCI	1	1	1	1	1	0.161644	1
1222	1	1	74.7918	1	1	0	1.2	0	0	346	24	1	1	PCI	1	1	1	1	1	3.26027	0
1223	0	2	61.5507	1	0	1	1.42146	0	0	2000.1	54	1	1	PCI	1	1	1	1	1	3.92329	0
1224	1	1	59.874	1	0	1	0.9	0	0	950	59	1	3	PCI	1	1	1	1	0	3.24384	0
1225	0	1	79.5836	1	0	0	1.2	0	0	1300	54	1	3	PCI	1	1	1	1	1	3.83836	0
1226	0	2	76.2	0	0	1	0.726047	0	0	2549.29	55	1	1	PCI	1	1	1	1	0	3.18904	0
1227	0	1	72.3945	1	0	0	1.79529	0	0	1280	40	1	1	PCI	1	1	1	1	1	3.7726	0
1228	0	2	68.6082	1	0	0	1.6	0	0	1540	51	1	3	PCI	1	1	1	1	1	3.09863	0
1229	1	1	58.8192	0	0	1	1.1	0	0	1114	39	1	3	PCI	1	1	1	1	1	3.1589	0
1230	1	1	77.3534	1	0	0	1.40529	0	1	574	58	1	1	PCI	1	1	1	1	1	3.15068	0
1231	0	2	52.1205	1	0	1	1.1	0	0	1864	62	1	1	PCI	1	1	1	1	0	0.635616	0
1232	0	1	56.3096	1	1	1	1.5	0	0	2020	58	1	3	PCI	1	1	1	1	1	4.93151	0
1233	1	1	79.4082	1	0	0	1.6042	0	0	688	66	1	2	PCI	1	1	1	1	1	5	0
1234	0	2	72.1014	0	1	0	1.2	0	0	186	51	1	2	PCI	1	1	1	0	1	3.59452	1
1235	0	2	56.3808	1	0	1	1.4	1	0	2140	24	1	3	PCI	1	1	1	1	1	0.372603	1
1236	0	2	49.6849	1	0	1	1.51756	0	0	2400	44	1	2	PCI	1	1	1	1	0	2.74247	0
1237	0	1	77.2959	1	0	0	1.3106	0	0	3690	55	1	1	PCI	1	1	1	1	1	2.33151	0
1238	0	2	69.4137	1	0	1	1.2	0	0	1134	59	1	3	PCI	1	1	1	1	0	5	0
1239	0	2	53.9781	0	1	1	1.3	0	0	1160	35	1	3	PCI	1	1	1	1	1	3.04384	0
1240	0	2	67.3671	1	0	1	1.3	0	0	2080	49	1	1	PCI	1	1	1	1	1	3.90411	0
1241	0	1	64.0685	1	1	0	1.4	1	0	3320	50	1	3	PCI	1	1	1	1	1	5	0
1242	0	2	64.3644	1	1	1	1.4	1	0	472	23	0	2	conservative	1	1	1	0	1	0.309589	1
1243	0	2	58.1288	1	0	1	1.2	0	0	3560	59	1	1	PCI	1	1	1	1	1	3.09589	0
1244	1	1	55.9014	1	0	1	1.2	0	0	372	57	1	2	PCI	1	0	1	1	0	2.95616	0
1245	0	2	72.2247	0	0	1	1.3	0	0	218	46	1	0	PCI	1	1	1	1	0	3.16712	0
1246	0	2	55.7973	0	0	1	0.803683	0	0	2880	41	1	2	PCI	1	1	1	1	1	4.21644	1
1247	0	2	54.8658	1	0	1	0.98342	0	0	256	54	1	1	PCI	1	1	1	1	0	3.04932	0
1248	1	1	79.8548	1	1	0	1.39539	0	0	4240	36	1	2	PCI	1	1	1	1	1	0.449315	1
1249	0	2	70.126	1	1	1	2.3	0	0	10360	30	1	3	PCI	1	1	1	1	1	0.569863	1
1250	0	1	70.7781	1	0	0	1.36741	0	0	1160	53	1	1	PCI	1	1	1	1	0	3.70137	0
1251	0	2	68.8411	1	1	0	1.3	0	0	988	39	0	0	conservative	1	1	1	1	1	3.09589	0
1252	1	1	58.5288	1	0	1	0.73627	0	0	4160	40	1	3	PCI	1	1	1	1	1	3.7863	0
1253	0	2	59.7123	1	0	1	1.7	0	0	1098	40	1	3	PCI	1	1	1	1	0	3.64932	0
1254	1	1	46.4986	0	0	1	1.4056	0	0	2460	49	1	3	PCI	1	1	1	1	0	5	0
1255	1	1	79.1068	1	1	0	0.657531	0	0	664	55	1	1	PCI	1	1	1	1	1	5	0
1256	0	1	72.7425	1	0	0	0.89834	0	1	1464	55	1	1	PCI	1	1	1	1	0	3.63562	0
1257	0	2	52.2932	0	0	1	1.1	0	0	2180	42	1	1	PCI	1	1	1	1	1	3.05479	0
1258	0	2	43.0493	1	0	0	1.6	0	0	640	18	1	0	PCI	0	1	1	0	1	4.51233	0
1259	0	1	76.1342	0	0	0	1.94734	0	0	1906	40	1	1	PCI	1	1	1	1	0	3.63836	0
1260	0	2	68.9808	1	0	1	1.3	0	0	648	45	1	2	PCI	1	1	1	1	0	3.66027	0
1261	0	1	61.4986	0	0	0	0.878197	0	0	174	63	1	2	PCI	1	1	1	1	0	3.07671	0
1262	0	1	80.5315	1	0	0	1.6544	0	0	1192	52	1	2	PCI	1	1	1	1	0	3.18904	0
1263	0	2	60.6301	1	0	0	0.906811	0	0	276	62	1	3	PCI	1	1	1	1	0	2.86849	0
1264	0	1	48.0904	1	0	1	0.803878	0	0	1050	57	1	0	conservative	1	1	1	1	0	3.60822	0
1265	1	1	52.726	1	0	0	1.10728	0	0	172	65	1	1	PCI	1	1	1	1	0	3.63288	0
1266	0	1	70.7233	1	0	0	0.943391	0	0	2140	56	1	1	conservative	1	1	1	1	1	3.0274	0
1267	1	1	67.8493	0	0	0	1.1	0	0	4300	35	1	3	PCI	1	1	1	1	1	3.00274	0
1268	0	2	58.6685	0	0	0	1.11196	0	0	1016	57	1	3	PCI	1	1	1	1	0	5	0
1269	0	2	75.8219	0	0	1	0.731091	0	0	812	57	1	2	conservative	1	1	1	1	1	3.02466	0
1270	0	2	53.6521	1	0	1	1.2	1	0	376	35	1	3	PCI	1	1	1	1	1	3.71233	0
1271	0	1	68.8795	1	0	0	0.755602	0	0	1836	25	1	1	PCI	1	1	1	1	1	3.09041	0
1272	1	2	72.8822	0	0	1	1.3	1	0	158	53	1	1	conservative	1	1	1	1	0	3.60274	0
1273	0	2	53.5425	1	0	1	0.593654	0	0	1508	54	1	1	PCI	1	1	1	1	0	2.96438	0
1274	0	2	57.6466	0	0	0	1.2	0	0	3320	63	1	2	PCI	0	0	0	0	0	2.96164	0
1275	0	2	47.7918	1	0	1	0.9	0	0	76	57	1	1	PCI	1	1	1	1	0	3.59178	0
1276	0	1	64.0795	1	1	0	1.1	0	0	350	38	1	2	PCI	1	1	1	1	0	2.92055	0
1277	0	2	63.7918	0	0	1	1.3	0	0	1134	64	0	1	conservative	1	1	1	1	0	3.0274	0
1278	0	2	45.7452	0	0	1	1.1373	0	0	672	65	1	2	PCI	1	1	1	1	0	5	0
1279	0	2	61.7753	0	0	0	1.3	0	0	214.638	69	1	3	PCI	1	1	1	1	0	3.58904	0
1280	0	2	42.6877	1	0	0	1.7	0	0	684	55	1	2	PCI	1	1	1	1	0	3.60822	0
1281	0	2	69.2	1	0	0	1.24671	0	0	672	53	1	1	PCI	1	1	1	1	0	5	0
1282	0	2	65.7589	1	0	1	0.634352	0	1	4640	57	1	1	PCI	1	1	1	1	1	2.9863	0
1283	0	1	56.5918	1	1	1	1.8	0	0	430	30	1	3	PCI	1	1	1	1	1	5	0
1284	1	1	47.611	0	0	0	1.37963	0	0	578	63	1	0	conservative	1	1	1	1	0	3.68493	0
1285	0	1	43.8192	1	0	1	0.9	0	0	2280	37	1	1	PCI	1	1	0	1	0	3.56986	0
1286	0	2	69.5041	0	0	0	1.24632	0	0	864	53	1	3	CABG	0	0	0	0	0	3.56164	0
1287	0	2	57.874	1	0	1	1.12132	0	0	1346	64	1	3	PCI	0	0	0	0	0	4.99178	0
1288	1	2	57.7616	1	0	0	1.63409	1	0	1658	28	1	1	conservative	1	1	1	1	1	2.90685	0
1289	0	1	73.6986	0	0	0	1.15994	0	0	3040	56	1	2	PCI	0	0	0	0	0	3.75616	1
1290	0	2	52.6767	0	0	1	1	0	0	994	55	1	2	PCI	1	1	1	1	0	3.54795	0
1291	1	1	62.5671	1	0	0	0.9	0	0	358	52	1	3	PCI	0	0	0	0	0	2.87123	0
1292	0	1	65.1671	1	0	0	2	0	0	556	61	1	2	PCI	1	1	0	1	0	3.92877	0
1293	0	2	69.9123	1	0	1	1.06802	0	1	4040	32	1	1	conservative	1	1	1	1	1	3.54521	0
1294	0	1	63.8658	1	1	0	1.03427	1	0	3600	35	1	3	PCI	1	1	1	1	1	1.72603	0
1295	0	2	60.7671	1	1	0	1.20668	0	1	438	58	1	1	PCI	1	0	1	1	1	3.66027	0
1296	0	1	73.3178	0	1	0	1.8	0	0	3340	40	1	2	PCI	1	1	1	1	1	2.72329	0
1297	0	2	69.2055	1	0	0	1.9	0	0	2660	52	1	3	PCI	1	1	0	1	1	2.92055	0
1298	0	1	81.3123	1	0	0	1.51494	0	0	1020	40	1	2	PCI	0	0	0	0	0	3.29863	1
1299	0	2	67.7945	1	0	1	1.2	0	0	1100	52	1	1	PCI	1	1	1	1	1	2.91233	0
1300	0	1	67.4192	1	1	0	1.2	0	0	860	48	1	1	PCI	1	1	1	1	0	2.86027	0
1301	0	2	64.9479	1	1	1	3.4	0	0	1934	44	1	3	PCI	1	1	1	1	1	4.86301	0
1302	0	2	25.9562	0	0	1	1.4	0	0	13860	52	1	1	PCI	1	1	1	1	0	3.50411	0
1303	0	2	52.5068	1	0	0	1.4	0	0	4900	45	1	1	PCI	1	1	1	1	1	4.90685	0
1304	0	2	36.5178	0	0	0	1.6	0	0	1712	67	1	1	PCI	0	0	0	0	0	4.90411	0
1305	0	1	56.5534	1	0	1	1.3	0	0	3420	49	1	1	PCI	1	1	1	1	1	3.46027	0
1306	0	1	58.526	1	1	0	2	0	0	534	48	1	3	PCI	1	1	1	1	0	2.90411	0
1307	0	2	75.9096	1	0	0	0.792571	1	1	2060	43	1	3	PCI	1	1	1	1	1	2.88767	0
1308	0	2	58.737	1	0	0	1.2	0	0	2020	58	1	3	PCI	1	1	1	1	1	3.44384	0
1309	0	1	70.5644	1	0	0	1.6	0	0	996	60	1	3	PCI	1	1	1	1	0	1.04384	1
1310	0	1	59.6356	1	0	0	1.4	0	0	3360	37	1	1	PCI	1	1	1	1	1	4.88493	0
1311	1	2	73.3589	1	1	1	0.736977	0	1	1340	51	1	1	PCI	1	0	1	1	1	3.46301	0
1312	0	1	71.2411	1	0	0	1.4	0	0	314	55	1	2	PCI	1	1	1	1	0	4.62466	0
1313	0	2	30.8356	1	0	1	0.993329	0	0	1955.48	45	1	1	PCI	1	1	1	1	0	5	0
1314	0	2	68.4356	1	0	1	1.1	1	0	700	51	1	3	CABG	1	1	1	1	1	4.87397	0
1315	0	2	58.9945	0	0	0	1.45387	0	0	1022	58	1	0	PCI	1	1	1	1	0	3.41918	0
1316	1	1	67.4356	1	1	0	1	0	0	3693.5	36	1	3	PCI	1	1	1	0	1	3.52329	0
1317	1	2	34.526	0	0	1	1.1	0	0	2160	56	1	1	conservative	1	1	1	1	0	2.87123	0
1318	1	1	53.1781	1	0	1	0.9	0	0	1226	60	1	1	PCI	1	1	1	1	0	4.85205	0
1319	1	1	51.4685	1	0	1	1	0	0	256	49	1	3	PCI	1	1	1	1	1	2.09315	0
1320	0	2	36.6603	1	0	1	1.3	0	0	2260	52	1	1	PCI	1	1	1	1	0	3.42192	0
1321	0	2	66.9151	1	0	1	2.7	0	0	540	59	1	1	PCI	1	1	1	1	1	2.76438	0
1322	1	1	70.2712	1	1	0	1.60893	0	0	1482	58	1	3	PCI	1	1	1	1	1	4.50959	0
1323	1	1	58.5753	1	1	1	0.8	0	0	430	57	1	1	PCI	1	1	0	0	0	3.48493	0
1324	0	2	60.3699	1	1	0	0.720553	0	1	1352	60	1	3	PCI	0	0	0	0	0	3.4137	0
1325	0	1	59.7781	0	1	1	1	0	0	564	61	1	1	PCI	1	1	1	1	0	3.41644	0
1326	0	2	72.5699	1	1	1	1.3	0	0	812	72	1	1	PCI	1	1	1	1	0	3.40548	0
1327	0	2	35.6493	0	0	0	1.3	0	0	370	65	1	0	conservative	0	0	0	0	0	3.36712	0
1328	0	2	39.5726	0	0	1	1.7	0	0	10960	39	1	0	PCI	0	0	0	0	0	4.81096	0
1329	0	1	62.0384	1	0	1	1.39879	0	0	1372	45	1	1	PCI	1	1	1	1	0	3.36438	0
1330	1	1	58.4685	1	0	0	0.8	0	0	1572	60	1	2	PCI	1	1	1	1	0	2.83014	0
1331	0	2	42.5534	1	0	1	1.3	0	0	1652	52	1	0	PCI	0	0	0	0	0	3.4	0
1332	0	2	69.5342	0	0	0	0.750388	0	0	280	62	1	0	PCI	0	0	0	0	0	4.62192	0
1333	0	2	66.4082	1	0	0	0.589236	0	0	416	60	1	2	PCI	0	0	0	0	0	3.81918	0
1334	0	2	68.2575	0	1	0	1.1	0	0	2020	55	1	3	PCI	0	0	0	0	0	1.93151	0
1335	0	2	42.8822	0	1	0	0.50424	0	0	10420	27	1	2	PCI	0	0	0	0	0	3.36986	0
1336	0	1	87.8986	0	0	0	0.57075	0	0	4340	32	1	2	PCI	0	0	0	0	0	1.77534	1
1337	0	1	63.8932	0	0	1	1.3	0	0	2380	52	1	1	PCI	0	0	0	0	0	2.8	0
1338	0	2	46.726	0	0	1	1.1	0	0	614	68	1	2	PCI	1	1	1	1	1	2.68767	0
1339	0	1	60.1096	1	0	0	2.1	0	0	58	36	1	3	PCI	1	1	1	1	1	4.63562	0
1340	1	1	76.7753	1	1	0	0.902919	0	0	382	46	1	3	PCI	1	1	1	1	1	4.27945	1
1341	1	1	62.9534	0	0	1	1.05737	0	0	1642	40	1	1	PCI	1	1	1	1	0	3.29589	0
1342	0	2	64.3041	1	0	1	1.2	0	0	1730	62	1	1	PCI	1	1	1	1	0	2.21096	0
1343	0	2	55.5068	1	1	0	1.5	1	0	2140	25	1	3	PCI	1	1	1	1	1	4.84384	0
1344	0	2	68.7479	0	1	0	1.36225	0	1	3340	47	1	0	PCI	1	1	1	1	0	3.30959	0
1345	0	2	68.1726	1	0	1	3.2	0	0	1314	51	1	3	PCI	1	1	1	1	1	2.88219	0
1346	0	2	59.6	0	0	1	0.9	0	0	768	62	1	1	PCI	0	0	0	0	0	3.3589	0
1347	0	1	68.326	1	0	1	1.7	0	0	2700	49	1	2	PCI	1	1	1	1	1	3.27397	0
1348	0	1	74.2164	1	0	0	1.5	0	0	648	50	1	3	PCI	1	1	1	1	0	3.26575	0
1349	0	2	57.8329	1	0	0	1.4	0	0	234	59	1	2	PCI	1	1	1	1	0	2.56164	0
1350	1	2	87.0822	1	0	0	0.695129	0	0	372	30	1	2	conservative	1	1	1	1	1	0.758904	1
1351	0	1	62.4411	1	1	1	0.9	0	0	538	55	1	3	PCI	1	1	1	1	0	2.57534	0
1352	0	2	68.9644	1	0	0	1.1	1	0	3920	52	1	3	PCI	1	1	1	1	0	1.11781	0
1353	0	2	54.3808	1	0	1	0.945774	0	0	2440	43	1	3	CABG	1	1	1	1	1	2.84384	0
1354	0	2	44.5562	1	0	1	1	0	0	720	60	1	1	PCI	1	1	1	1	0	2.51233	0
1355	0	1	80.2192	1	1	0	1.36154	0	0	1342	58	1	3	PCI	1	1	1	0	0	2.49041	0
1356	0	2	35.5205	1	0	1	1	0	0	884	45	1	1	PCI	1	1	1	1	1	3.49041	0
1357	0	1	51.8986	0	0	1	0.996129	0	0	1804	43	1	3	PCI	1	1	1	1	0	2.72603	0
1358	0	2	59.9479	0	0	1	1.3	0	0	840	45	1	3	PCI	1	1	1	1	0	4.70959	0
1359	0	2	49.3233	1	1	0	1.2	0	0	1626	42	1	2	PCI	1	1	1	1	1	2.66575	0
1360	1	1	57.5534	1	0	1	0.8	0	0	3360	45	1	1	PCI	1	1	1	0	1	2.6137	0
1361	1	1	60.989	1	1	1	0.8	0	0	3320	48	1	1	PCI	1	1	1	1	0	3.24384	0
1362	0	2	44.9671	0	0	1	0.9	0	0	866	52	1	1	PCI	1	1	1	1	1	2.47123	0
1363	1	1	59.8438	1	0	0	1	0	0	170	50	1	2	PCI	1	1	1	1	0	2.52877	0
1364	0	2	78.474	1	0	1	0.858464	1	0	694	35	1	2	PCI	1	1	1	1	1	2.51781	0
1365	0	2	70.9699	1	0	0	1.2	0	0	1502	39	1	3	PCI	1	1	1	1	1	2.15616	0
1366	0	2	45.8274	0	0	1	1.2	0	0	224	57	1	2	PCI	1	1	1	1	0	3.6274	0
1367	0	2	61.7041	1	0	1	0.851265	1	0	1428	28	1	3	PCI	1	1	1	1	0	2.64932	0
1368	1	2	75.1562	1	0	0	0.725888	1	1	990	22	1	2	PCI	1	1	1	1	1	3.19726	0
1369	0	2	63.1425	1	0	0	0.693972	1	0	678	53	1	3	PCI	1	1	1	1	0	4.67671	0
1370	0	1	38.0137	1	0	1	0.963361	0	0	3820	52	1	2	PCI	1	1	1	1	1	4.30137	0
1371	0	2	59.4	1	0	1	1.57087	0	1	1142	54	1	3	PCI	1	1	1	1	0	4.56986	0
1372	1	1	82.9753	1	0	0	1.01233	0	0	3840	52	1	3	PCI	1	1	1	1	0	4.6137	0
1373	0	2	58.611	1	0	1	1.4	0	0	1152	62	1	1	PCI	1	1	1	1	1	3.16712	0
1374	0	2	60.6877	1	0	0	4	0	0	16660	29	1	1	PCI	0	0	0	0	0	1.79726	0
1375	0	1	81.8192	1	0	0	0.551676	0	0	1486	33	1	3	PCI	1	1	1	1	1	2.58904	0
1376	0	2	53.0986	0	0	1	0.8	0	0	286	40	1	2	PCI	1	1	1	1	0	4.72877	0
1377	0	2	68.8493	1	0	1	1.3	0	0	1996	38	1	3	PCI	1	1	1	1	1	2.64384	0
1378	0	2	61.7123	1	0	0	1.23744	0	0	2580	36	1	2	PCI	1	1	1	1	0	2.87123	0
1379	0	2	50.5397	1	0	1	1	0	0	1976	35	1	2	PCI	1	1	1	1	1	4.61918	0
1380	1	2	81.4	1	1	0	1.40677	0	0	408	30	1	3	CABG	1	1	1	1	0	2.50685	0
1381	0	2	39.8164	1	0	1	1.2	1	0	1438	28	1	2	PCI	1	1	1	1	0	2.52877	0
1382	1	1	80.5534	1	0	0	1.28086	0	0	1458	51	1	3	PCI	1	1	1	1	1	3.20548	0
1383	1	1	69.789	0	0	1	0.624366	0	0	1816	48	1	3	PCI	1	1	1	1	0	3.1589	0
1384	0	2	55.3233	1	0	1	1.1	0	0	2820	53	1	1	PCI	1	1	1	1	1	4.24384	0
1385	0	2	37.9507	0	0	1	2.30907	0	0	2000	47	1	1	PCI	1	1	1	1	0	2.51233	0
1386	0	2	58.5397	0	0	1	1.1	0	0	962	47	1	1	PCI	1	1	1	1	0	2.62192	0
1387	1	1	68.9644	1	0	0	4.9	0	0	988	45	1	3	PCI	1	1	0	0	1	3.13699	0
1388	0	2	54.6822	0	0	1	1.1	1	0	512	46	1	3	PCI	1	1	1	1	0	2.51507	0
1389	0	2	31.2329	0	0	0	0.9	0	0	430	64	1	0	conservative	0	0	0	0	0	3.10137	0
1390	0	1	82.3397	1	0	0	1.36603	0	0	700	30	1	3	PCI	1	1	1	1	0	3.11781	0
1391	1	1	68.2521	1	0	0	0.9	0	0	432	58	1	3	PCI	1	1	1	1	1	4.23014	0
1392	0	2	64.6219	1	0	1	2.14425	0	0	250	50	1	2	PCI	1	1	1	1	1	3.10959	0
1393	0	2	57.6548	1	0	0	1.3	0	0	342	32	1	2	PCI	1	1	1	1	1	3.75342	0
1394	1	1	81.4	1	1	0	0.686893	0	0	1714	48	1	2	PCI	1	0	1	1	1	0.413699	1
1395	0	2	45.3589	1	0	1	1.73322	0	0	584.773	50	1	1	PCI	1	1	1	1	0	3.18082	0
1396	0	2	58.6411	1	1	1	1.1	0	0	5200	31	1	2	PCI	1	1	1	1	1	2.36986	0
1397	0	2	64.0082	1	0	0	1.54184	1	0	1588	47	1	3	PCI	1	1	1	1	0	0.969863	1
1398	1	1	74.0411	1	0	0	1.1	0	0	350	65	1	2	PCI	1	1	1	1	0	2.68219	0
1399	1	1	52.9808	1	1	0	1	0	0	3360	45	1	1	PCI	1	1	1	1	1	3.12603	0
1400	0	1	53.5918	0	0	1	1.5	0	0	5600	42	1	1	PCI	0	0	0	0	0	2.40274	0
1401	0	1	68.7068	1	0	0	1.5	0	0	1104	65	1	3	PCI	1	1	1	1	0	4.06301	0
1402	0	2	86.8192	1	1	0	1.00075	1	0	434	39	1	3	PCI	1	1	1	1	0	1.04658	1
1403	0	2	47.4658	1	0	1	1.73287	0	0	1280	60	1	1	PCI	1	1	1	1	0	3.04658	0
1404	0	2	53.7178	1	0	0	1.51935	1	0	6780	42	1	3	PCI	0	0	0	0	0	0.638356	1
1405	1	2	73.9178	1	0	0	1.22455	0	1	2156.85	25	1	2	PCI	1	1	1	1	1	3.06575	0
1406	0	1	56.389	1	0	0	1.3	0	0	328	38	1	3	PCI	1	1	1	1	1	2.41918	0
1407	0	1	77.3233	0	0	1	0.889766	0	0	390	71	1	1	PCI	1	1	1	1	0	3.0137	0
1408	0	1	54.5726	0	0	1	1.2	0	0	1484	63	1	1	PCI	1	1	1	1	0	3.02192	0
1409	0	2	53.5562	1	1	0	1.4	0	0	1924	54	1	2	PCI	1	1	0	0	0	4.18356	0
1410	0	2	63.9836	1	0	1	1.28764	0	1	490	25	1	1	PCI	1	1	1	1	1	3.94521	0
1411	1	2	81.4466	0	1	1	1.41736	0	1	4240	46	1	3	PCI	1	1	1	1	1	2.51233	0
1412	1	1	70.7973	1	1	0	1.1	0	0	1754	63	1	2	PCI	1	1	0	1	0	2.37534	0
1413	1	1	76.8822	1	0	1	1.12124	0	0	290	50	1	2	PCI	1	1	1	1	0	3.16164	0
1414	0	2	66.9945	0	0	0	1.1	0	0	1110	50	1	1	PCI	1	1	1	1	0	4.46849	0
1415	0	2	51.8959	1	0	1	1.2	0	0	1158	46	1	1	PCI	1	1	1	1	0	2.98356	0
1416	0	2	59.1507	0	0	0	2.17842	0	0	1324	48	1	2	PCI	1	1	1	1	0	2.88219	0
1417	0	1	61.6877	0	0	1	1.2	0	0	982	68	1	1	PCI	1	1	1	1	0	4.37534	0
1418	0	2	55.3836	1	0	0	1.6	0	0	1068	17	1	3	PCI	1	1	1	1	1	2.96986	0
1419	0	2	54.9644	0	0	1	1.3	0	0	2360	41	1	2	PCI	1	1	1	1	1	3.42192	0
1420	0	2	80.4137	1	1	0	0.76832	1	0	2560	25	1	3	PCI	1	1	1	1	1	2.35068	1
1421	0	2	70.3863	0	0	0	0.809417	0	1	3980	31	1	1	PCI	1	1	1	0	1	3.01918	0
1422	0	1	71.9671	0	0	0	1.3	0	0	1188	61	1	1	PCI	1	1	1	1	0	2.95068	0
1423	0	2	53.6932	0	0	1	1.2	0	0	1828	52	1	3	PCI	0	0	0	0	0	2.94521	0
1424	1	1	44.9068	1	0	1	1.27979	0	0	4180	31	1	1	PCI	1	1	1	1	1	2.94521	0
1425	0	2	64.0685	1	0	1	1.79925	0	0	7980	39	1	2	PCI	1	1	0	1	1	3.03562	0
1426	0	2	64.3178	0	0	1	1.1	0	0	1862	48	1	3	PCI	1	1	1	1	0	3.02466	0
1427	1	1	78.8575	1	0	0	1.30619	0	0	2560	52	1	2	PCI	1	1	1	1	1	2.39452	0
1428	0	1	67.7973	1	0	0	1.2	0	0	608	63	1	3	PCI	1	0	1	1	0	3.43288	0
1429	0	2	59.3288	1	0	1	1.3	0	0	974	47	1	1	PCI	1	1	1	1	0	3.84384	0
1430	0	1	73.6767	1	0	0	1.13915	0	0	2120	41	1	3	PCI	1	1	1	1	1	3.96712	0
1431	0	2	84.8548	1	1	1	2.45474	0	1	1618	38	1	3	PCI	1	1	1	1	1	0.0493151	0
1432	1	1	57.5288	1	0	1	0.9	0	0	1218	52	1	1	PCI	1	1	1	1	0	2.28493	0
1433	0	2	63.6164	1	0	1	0.9	0	0	1832	54	1	1	PCI	1	1	1	1	0	2.94521	0
1434	0	1	73.0986	1	1	0	1	1	0	526	36	1	3	PCI	1	1	1	1	1	2.26849	0
1435	0	2	45.6301	1	0	1	1.2	0	0	578	54	1	3	PCI	1	1	1	1	0	3.28767	0
1436	0	1	73.9151	1	1	0	1.1	0	0	680	50	1	3	PCI	1	1	1	1	0	2.28767	0
1437	0	1	83.0027	1	0	0	1.89994	0	0	1888	52	1	2	PCI	1	1	1	1	1	1.42466	1
1438	0	2	54.9945	1	0	1	1.2	1	0	162	56	1	3	PCI	1	1	1	1	0	4.33151	0
1439	1	1	67.8877	1	0	1	2.4	0	0	2120	45	1	2	PCI	1	1	1	1	1	3.37808	0
1440	0	2	65.8137	1	0	1	1	0	0	598	59	1	1	PCI	1	1	1	1	0	2.23836	0
1441	0	2	67.7836	0	0	0	1.1	0	0	254	50	1	3	PCI	1	1	1	1	0	2.89589	0
1442	0	2	64.8384	1	0	1	1.1	0	0	1354	53	1	3	PCI	1	1	1	1	1	2.87397	0
1443	0	1	66.2466	1	0	0	1	1	0	244	48	0	0	conservative	1	1	1	1	0	2.87945	0
1444	1	1	60.7178	0	0	1	0.9	0	0	6766	31	1	1	PCI	1	1	1	1	0	4.33425	0
1445	1	1	69.3589	1	0	1	0.798023	0	0	1824	56	1	2	PCI	1	1	1	1	0	2.89315	0
1446	0	2	54.7726	0	0	1	1	0	0	2120	55	1	3	PCI	1	1	0	1	0	2.8411	0
1447	0	2	52.1041	0	0	1	1.4	0	0	4700	44	1	2	PCI	1	1	1	1	1	4.25753	0
1448	0	2	46.6384	1	0	1	1	0	0	1572	49	1	1	PCI	1	1	1	1	1	2.0274	0
1449	0	2	69.8274	0	0	0	1	0	0	1090	45	1	2	PCI	1	1	1	1	1	3.2411	0
1450	0	2	50.9178	1	0	1	1.2	0	0	1470	46	1	2	PCI	1	1	1	1	0	3.61918	0
1451	1	1	36.5068	1	0	1	0.9	0	0	558	58	1	2	PCI	1	1	1	1	0	3.60548	0
1452	0	1	52.9726	0	1	1	0.825758	0	0	1754	48	1	1	PCI	1	1	1	1	0	2.81644	0
1453	0	1	67.8685	1	0	0	1.1	0	0	540	54	1	2	PCI	1	1	1	1	0	3.32877	0
1454	0	2	59.5644	1	0	0	0.844666	0	0	4320	36	1	2	PCI	1	1	1	0	1	2.77808	0
1455	0	2	66.9562	1	0	0	1.4	0	0	3020	40	1	2	PCI	1	1	1	1	1	2.10959	0
1456	0	2	65.1342	0	0	0	2.2156	0	0	2200	55	1	1	PCI	1	1	1	1	1	3.88219	0
1457	0	1	77.8384	1	0	0	0.715689	0	0	356	48	1	1	PCI	1	1	1	1	0	2.7726	0
1458	1	1	86.9699	1	1	0	1.15284	0	0	2060	39	1	3	PCI	1	1	1	1	1	2.17534	0
1459	0	1	64.6301	0	0	0	1.46969	0	0	2120	49	1	3	PCI	1	1	1	1	0	2.40274	0
1460	0	2	54.3671	1	0	0	1.5	0	0	2240	45	1	3	PCI	1	0	0	0	0	2.73699	0
1461	0	2	39.8575	0	0	1	1.6	0	0	4380	47	1	3	PCI	1	1	0	1	1	2.04384	0
1462	0	2	73.9644	0	1	0	1.22356	0	0	1990	30	1	1	PCI	1	1	1	1	0	2.05479	0
1463	0	2	83.989	1	1	1	1.4	0	1	667	38	1	3	PCI	1	1	1	1	1	1.07671	1
1464	0	2	64.8603	1	0	1	1.4	0	0	1382	56	1	3	PCI	1	1	1	1	1	2.73425	0
1465	0	2	37.5836	0	0	1	0.9	0	0	1600	68	1	0	conservative	1	1	1	0	0	4.20274	0
1466	0	2	69.7671	0	0	0	1.9	0	0	1940	10	1	3	PCI	1	1	1	1	1	0.709589	1
1467	0	2	49.6877	1	0	1	0.8	0	0	312	35	1	2	PCI	1	1	1	1	1	2.74521	0
1468	1	2	61.9041	1	1	0	2.3	0	0	1512	20	1	3	PCI	1	1	1	0	1	0.665753	1
1469	0	2	75.3397	1	0	1	1.15551	0	0	624	35	1	3	PCI	1	1	1	1	0	0.29863	1
1470	0	2	40.9699	1	1	0	0.9	0	0	978	45	1	3	PCI	1	1	1	1	0	3.81918	0
1471	0	2	56.537	1	1	0	1.2	0	0	470	60	1	3	PCI	1	1	1	1	0	4.26027	0
1472	1	1	49.8384	1	0	0	1.03528	0	0	658	41	1	1	PCI	1	1	1	1	0	3.77808	0
1473	0	2	84.789	1	0	1	1.18024	1	0	1480	54	1	3	PCI	1	1	1	1	0	2.07945	0
1474	1	1	75.7397	1	0	0	1.53522	0	0	724	42	1	2	PCI	1	1	1	1	1	0.00547945	0
1475	0	2	49.1753	1	0	1	1	0	0	4320	58	1	3	PCI	1	1	1	1	0	0.594521	1
1476	0	1	66.3068	1	1	0	1.80053	0	0	3071.4	52	1	1	PCI	1	1	1	1	0	0.030137	0
1477	1	2	87.4685	1	0	0	0.932943	0	0	506	60	1	3	conservative	1	1	1	1	1	2.54247	1
1478	0	2	60.4356	1	0	1	1.28916	0	0	6742	33	1	2	PCI	1	1	1	1	1	3.1589	0
1479	1	1	35.0822	1	0	1	0.9	0	0	3600	35	1	1	PCI	1	1	1	1	0	3.78904	0
1480	1	1	78.4055	1	0	0	1.20713	0	0	1372	62	1	1	PCI	1	1	1	1	1	3.84932	0
1481	0	2	52.7808	0	0	1	1	0	0	840	63	1	1	PCI	1	1	1	1	0	2.6411	0
1482	1	2	80.3014	1	0	0	2.37973	0	0	862	14	1	1	conservative	1	1	1	1	1	0.287671	1
1483	0	2	56.6027	1	0	1	1.4	0	0	800	49	1	2	PCI	1	1	1	0	0	4.2274	0
1484	0	2	38.1534	1	0	0	1.1	0	0	408	75	1	2	PCI	1	1	1	1	0	1.07671	0
1485	0	1	71.4384	1	0	0	1.2	1	0	500	52	1	1	PCI	1	1	1	1	0	2.03288	0
1486	0	2	53.6301	1	0	0	1.58021	0	1	3080	52	1	2	PCI	1	1	1	1	0	3.68493	0
1487	1	2	84.989	1	0	0	0.523602	0	0	354	47	1	3	CABG	1	1	1	0	1	4.01096	0
1488	0	2	39.126	1	1	0	1.3	0	0	2240	40	1	2	PCI	0	0	0	0	0	1.63562	0
1489	0	2	44.2849	1	1	1	0.9	0	0	1844	46	1	3	PCI	1	1	1	1	1	0.0273973	0
1490	0	2	54.4548	1	0	0	1	0	0	1400	73	1	1	PCI	0	0	0	0	0	1.94795	0
1491	0	1	75.6356	1	1	0	2.11085	0	1	2020	58	1	2	PCI	1	1	1	1	1	2.58356	0
1492	0	1	71.1425	1	0	0	0.929259	0	1	1090	49	1	3	PCI	1	1	1	1	1	2.00548	0
1493	0	2	47.8521	0	0	1	1.1	0	0	1914	40	1	1	PCI	1	1	1	1	1	2.55342	0
1494	1	1	59.1315	1	1	0	0.8	0	0	5061.02	45	1	3	PCI	1	1	1	1	1	2.57534	0
1495	0	2	56.4082	0	1	0	1.3	0	0	454	48	1	3	PCI	1	1	1	1	1	2.55068	0
1496	0	2	56.0603	1	0	1	1.2	0	0	1728	63	1	2	PCI	1	1	1	1	0	4.01644	0
1497	0	2	76.8027	1	0	1	0.691261	0	0	1372	52	1	3	PCI	1	1	1	1	1	3.56438	0
1498	0	1	66.5233	1	0	0	0.87131	0	0	312	57	1	3	PCI	1	1	1	1	0	1.88493	0
1499	1	1	68.1425	1	0	0	0.55017	0	1	950	58	1	1	PCI	1	1	1	1	1	1.94521	0
1500	0	2	51.0521	1	0	1	0.562609	0	0	1924	45	1	1	PCI	1	1	1	1	1	1.56164	0
1501	0	1	53.9342	1	0	1	1	0	0	2020	42	1	3	PCI	1	1	1	1	1	3.0411	0
1502	0	2	66.5534	0	0	1	1.35801	0	1	822	37	1	3	PCI	0	0	0	0	0	1.91233	0
1503	1	1	80.2849	1	0	0	1.02842	0	0	1774	58	1	3	PCI	1	1	1	1	1	0.317808	1
1504	0	2	50.3397	1	0	1	1.2	0	0	796	51	1	3	PCI	1	1	1	1	1	3.6	0
1505	0	2	47.5562	1	0	1	1.6	1	0	524	20	1	3	PCI	1	1	1	1	1	3.17534	0
1506	1	2	93.0164	1	0	0	1.05727	0	0	2980	38	1	3	PCI	1	1	1	1	0	1.92055	1
1507	0	1	41.0411	1	0	1	1	0	0	1188	62	1	2	PCI	1	1	1	1	0	2.49589	0
1508	0	1	74.8767	1	1	0	1.11526	0	0	126	47	1	3	PCI	1	0	0	0	0	1.87397	0
1509	1	2	66.4959	0	0	0	1.06024	0	0	226	48	1	0	Lysis	1	1	1	1	0	2.43836	0
1510	0	1	54.7342	0	0	0	0.779366	0	0	686	60	1	1	PCI	1	1	1	1	1	3.56164	0
1511	1	1	80.389	1	1	0	1.42667	0	0	604	61	1	3	PCI	1	1	1	1	0	1.8137	0
1512	0	2	71.5288	1	0	1	0.75294	0	0	846	65	1	1	PCI	1	1	1	1	1	1.03288	1
1513	0	2	45.9315	1	0	1	1.1	0	0	1968	54	1	1	PCI	1	1	1	1	0	3.7863	0
1514	0	2	54.7507	0	0	1	1.63164	0	0	2040	38	1	3	PCI	1	1	1	1	1	2.46301	0
1515	0	1	46.5671	0	0	1	0.624491	0	0	900	58	1	2	PCI	0	0	0	0	0	3.87671	0
1516	1	2	83.7123	1	1	0	1.98249	0	0	324	23	1	3	conservative	1	1	1	1	1	0.257534	1
1517	0	2	45.0137	1	0	1	1.2	0	0	116	34	1	2	PCI	1	1	1	1	0	1.77534	0
1518	0	1	61.7562	1	1	0	1.1	0	0	2460	62	1	2	PCI	1	1	1	1	1	2.48219	0
1519	1	1	73.3562	1	0	0	1.2	1	0	1360	57	1	3	PCI	1	1	1	1	1	1.37808	0
1520	0	2	55.0548	0	0	1	1	0	0	3060	32	1	1	PCI	1	1	1	0	1	3.83562	0
1521	0	1	83.3644	1	0	1	1.50484	0	0	1576	45	1	3	PCI	1	1	1	1	1	2.40274	0
1522	0	1	68.611	1	1	0	1.4	0	0	548	45	1	1	PCI	1	1	1	1	0	1.76164	0
1523	1	1	75.5151	1	0	0	1.76099	0	1	3780	43	1	2	PCI	1	1	1	0	1	2.36164	0
1524	0	1	66.0411	1	0	1	0.719286	1	0	4860	48	1	3	PCI	1	1	1	1	1	1.13151	0
1525	0	1	75.7507	1	1	0	2.14485	0	0	2284	56	1	2	PCI	1	1	1	1	1	2.35068	0
1526	0	2	44.4356	0	0	0	1	0	0	2060	54	1	1	PCI	1	1	1	1	0	2.13151	0
1527	0	1	56.7397	1	0	0	1.24292	0	0	1524	45	1	1	PCI	1	1	1	1	1	3.27945	0
1528	0	2	82.1726	0	0	0	2.32438	0	0	480	34	1	0	PCI	1	1	0	1	1	2.32603	0
1529	0	2	56.8219	1	0	0	2.1	0	0	1172	56	1	2	PCI	1	1	1	1	1	2.33151	0
1530	1	1	72.9836	1	1	0	0.9	0	0	540	70	1	2	PCI	1	1	1	1	1	2.16164	0
1531	1	1	79.1178	1	1	0	1.73771	0	0	2336	51	1	1	PCI	1	1	1	1	1	1.72055	0
1532	0	2	36.137	1	0	0	1.4	0	0	1052	49	1	1	PCI	1	1	1	1	1	1.49041	0
1533	0	1	63.2822	1	0	0	1.1	0	0	2680	40	1	1	PCI	0	0	0	0	0	2.30685	0
1534	0	2	69.9726	1	1	1	1.1	1	0	866	78	1	3	PCI	1	1	1	1	0	1.7589	0
1535	0	2	55.4466	0	0	1	1.1	0	0	4060	44	1	1	PCI	1	1	1	1	0	1.69589	0
1536	0	2	48.6247	0	0	1	1	0	0	1888	47	1	3	PCI	1	1	1	1	1	2.30137	0
1537	0	2	64.1068	1	0	1	1.1	0	0	778	62	1	1	PCI	1	1	1	1	1	2.98904	0
1538	0	2	59.6274	0	0	0	1.3	0	0	428	58	1	2	PCI	1	1	1	1	0	2.27123	0
1539	0	1	65.3808	1	1	0	1.2	0	0	12780	47	1	0	PCI	1	1	1	1	1	1.39452	0
1540	0	1	76.8027	1	0	0	1.03595	0	0	1820	78	1	2	PCI	0	0	0	0	0	0.186301	1
1541	0	1	62.9973	1	0	0	0.803163	0	0	808	61	1	3	PCI	1	1	1	1	1	3.39178	0
1542	1	2	79.674	1	0	0	0.940629	0	1	358	73	1	2	conservative	1	1	1	1	1	2.23562	0
1543	1	2	89.8384	1	0	0	0.975904	0	1	5240	71	1	1	conservative	1	1	1	1	1	0.323288	1
1544	0	2	69.9644	0	0	1	1.1	1	0	1060	55	1	2	PCI	1	1	1	1	0	2.23014	0
1545	1	1	51.9973	1	1	0	0.937444	1	0	1164	34	1	3	PCI	1	1	1	1	0	3.65479	0
1546	0	1	82.0986	1	0	0	1.62975	0	0	962	67	1	1	conservative	1	1	1	1	0	1.60548	0
1547	0	2	51.5644	1	1	0	1.1	0	0	11220	42	1	2	PCI	1	1	1	0	1	2.84658	0
1548	0	1	57.4356	1	1	0	1.1	0	0	4260	64	1	2	PCI	1	1	1	1	0	1.50685	0
1549	0	2	63.9726	1	1	1	1	0	0	2600	61	1	3	PCI	1	1	1	1	0	1.47945	0
1550	0	1	43.1562	0	0	1	1.3	0	0	772	64	1	3	PCI	1	1	1	1	0	3.59178	0
1551	0	1	72.6082	1	0	0	1.3	0	0	2240	60	1	1	PCI	1	1	1	1	1	1.60274	0
1552	0	1	68.4164	1	0	0	2.3	0	0	978	34	1	3	PCI	1	1	1	1	0	1.49589	0
1553	0	2	49.6932	1	0	0	1.3	0	0	2660	60	1	3	PCI	1	1	1	1	1	2.12603	0
1554	0	2	64.0137	1	0	0	1.2	0	0	5520	42	1	2	PCI	1	1	1	1	1	2.15616	0
1555	0	2	75.0548	1	1	1	1.42095	0	0	6560	21	1	3	PCI	1	1	1	1	0	0.909589	1
1556	0	1	48.4082	1	0	1	1.2	0	0	758	61	1	3	PCI	1	1	1	1	1	3.29041	0
1557	0	1	86.189	1	1	0	1.97513	0	0	1058	33	1	3	PCI	1	1	1	1	1	3.29315	0
1558	0	2	55.9863	0	0	1	1	1	0	2960	34	1	3	PCI	1	1	1	1	0	1.09863	0
1559	0	1	65.4219	1	1	0	1.1	1	0	5980	32	1	3	PCI	1	1	1	1	1	1.48767	0
1560	0	2	49.2795	1	0	1	1	0	0	4160	53	1	2	PCI	1	1	1	1	0	1.33699	0
1561	1	1	67.789	0	0	0	1.23839	0	0	8880	36	1	2	PCI	1	1	1	0	0	3.15068	0
1562	0	1	83.7342	1	1	0	0.663011	0	0	670	44	1	3	PCI	1	1	1	1	0	1.50685	0
1563	0	2	46.3644	1	0	1	1	0	0	796	67	1	2	PCI	1	1	1	1	0	1.5589	0
1564	0	1	63.5041	1	0	1	0.9	0	0	9620	51	1	3	PCI	1	1	1	1	1	3.63014	0
1565	1	1	66.6767	1	0	0	0.9	0	0	360	69	1	3	PCI	1	1	1	1	1	3.17808	0
1566	1	1	65.8	1	0	0	1.4	0	0	2480	54	1	1	PCI	1	1	1	1	0	2.03014	0
1567	1	2	93.2384	1	0	0	1.54476	0	1	380	75	1	3	PCI	1	1	0	1	1	2.8137	1
1568	0	2	61.6301	1	0	0	1.2	0	0	5580	59	1	3	PCI	1	1	1	1	0	1.36438	0
1569	0	1	66.4164	0	0	1	1.33679	0	0	2100	69	1	1	PCI	1	1	1	1	0	2.02192	0
1570	0	2	54.1562	0	0	1	1	0	0	12780	42	1	2	PCI	1	1	1	1	0	3.19726	0
1571	1	1	61.9041	1	0	0	0.967123	0	0	4280	56	1	2	PCI	1	1	1	1	0	3.18904	0
1572	0	2	66.1753	1	0	1	1.2	0	0	2660	70	1	2	PCI	1	1	1	1	0	2.01918	0
1573	0	2	48.7781	1	0	1	1.60509	0	0	17560	52	1	2	PCI	1	1	1	1	0	3.1863	0
1574	0	2	64.3863	0	0	1	1.28196	1	0	400	54	1	2	conservative	0	0	0	0	0	2.17808	0
1575	0	1	69.6603	1	1	0	1	0	0	1770	68	1	1	PCI	1	1	1	1	0	1.12603	0
1576	0	2	72.9945	1	0	1	2.42504	0	0	1270	48	1	2	PCI	1	1	1	1	1	3.18904	0
1577	0	1	54.7753	1	1	0	0.808393	0	0	5660	38	1	3	PCI	1	1	1	1	1	2	0
1578	0	1	69.9781	1	0	1	1.4	0	0	2440	52	1	2	PCI	1	1	1	1	1	1.27945	0
1579	0	1	85.4658	1	1	0	1.37698	0	1	1601.93	36	1	3	PCI	1	1	1	1	0	0.126027	1
1580	0	2	64.9479	1	0	1	0.856475	0	0	330	60	1	1	conservative	1	1	1	1	0	1.97808	0
1581	0	2	63.8219	1	1	1	1.1	1	0	1566	43	1	3	PCI	1	1	1	1	0	1.66301	0
1582	0	2	91.0192	1	1	0	1.73522	0	1	2840	26	1	3	PCI	1	1	1	1	1	1.52055	1
1583	1	2	70.674	0	0	0	1.2	0	0	1809.71	30	1	0	conservative	0	0	0	0	0	3.44384	0
1584	0	1	37.5068	1	0	1	1.17056	0	0	518	52	1	1	PCI	1	1	1	1	0	0.00273973	0
1585	0	1	83.5836	1	0	0	1.25199	0	0	808	25	1	0	conservative	1	0	1	1	1	1.4137	1
1586	0	1	69.4027	1	0	0	1.2	0	0	4400	66	1	2	PCI	1	1	1	1	0	1.93151	0
1587	0	2	48.3644	1	0	0	0.9	0	0	466	60	1	3	PCI	1	1	1	1	0	1.94521	0
1588	0	2	46.1068	1	0	1	1.1	0	0	11000	43	1	3	PCI	1	1	1	1	0	3	0
1589	0	2	52.0356	0	0	1	1.4	0	0	15080	57	1	1	PCI	0	0	0	0	0	1.12603	0
1590	1	1	64.0658	1	1	0	1	0	0	572	69	1	1	PCI	1	1	1	1	1	1.21096	0
1591	0	2	90.6384	1	0	0	0.516516	1	1	1746	67	1	3	PCI	1	1	1	0	1	2.46575	1
1592	1	1	82.3068	1	1	0	0.963812	0	0	3582.8	66	1	1	PCI	1	1	1	1	1	3.12329	0
1593	0	2	61.6767	0	0	0	1.1	0	0	1034	72	1	3	PCI	1	1	1	1	0	3.0137	0
1594	0	1	54.0877	0	1	0	0.8	0	0	2760	45	1	3	PCI	1	1	1	1	0	1.89863	0
1595	0	2	46.3479	1	1	1	1	0	0	4640	66	1	1	PCI	1	1	1	1	0	1.88767	0
1596	0	2	64.926	1	0	1	1.39659	0	1	2780	59	1	0	conservative	1	1	1	1	0	1.19726	0
1597	0	2	66.8986	1	0	1	1.41753	0	1	666	46	1	3	PCI	1	1	1	1	1	0.808219	1
1598	1	1	78.4575	1	0	0	1.59312	0	0	2840	42	1	1	PCI	1	1	0	1	1	1.88219	0
1599	1	1	85.2247	1	0	0	0.585693	0	0	2410	64	1	2	PCI	1	1	1	1	0	1.94795	0
1600	0	2	41.8137	0	0	1	1.1	0	0	760	65	1	0	conservative	1	0	0	0	0	1.27945	0
1601	1	1	76.7918	1	0	0	1	0	1	4049	43	1	2	PCI	1	1	1	1	1	1.59178	0
1602	0	1	77.9644	1	0	0	1.26286	0	0	6240	71	1	0	PCI	1	1	1	1	1	1.89041	0
1603	0	2	54.1233	1	0	0	2.5	1	0	1726	66	1	3	PCI	1	1	1	1	1	1.85753	0
1604	0	2	70.5589	1	0	0	1.30364	0	1	10700	21	1	1	PCI	1	1	1	0	1	0.306849	1
1605	0	2	40.3918	0	0	0	1.1	0	0	712	67	1	3	PCI	1	1	1	1	1	2.04932	0
1606	1	1	76.6603	1	0	0	1.46424	0	1	2169.45	32	1	3	PCI	1	1	1	1	1	1.3726	0
1607	0	2	75.4027	0	1	1	1.37272	1	0	954	57	1	2	PCI	0	0	0	0	0	1.17808	0
1608	0	1	63.8767	1	0	0	1.3	0	0	8200	45	1	1	PCI	1	1	1	1	1	1.8274	0
1609	0	1	72.7452	1	1	0	1.2	0	0	1011.97	44	1	1	PCI	1	1	1	1	1	1.86849	0
1610	1	1	80.9726	1	0	0	0.557355	0	0	530	73	1	2	PCI	1	1	1	1	0	1.81644	0
1611	0	2	70.4247	1	1	1	2.1	0	0	1152	33	1	3	PCI	1	1	1	1	1	3.11507	0
1612	0	2	72.6164	0	0	0	1.3	0	0	2561.92	33	1	3	PCI	1	1	1	1	1	3.06849	0
1613	0	1	67.8986	1	0	0	1.1	0	0	1958	56	1	2	conservative	1	1	1	1	0	1.27671	0
1614	0	2	65.2219	0	0	1	0.9	1	0	3100	45	1	3	PCI	1	1	1	1	1	1.83288	0
1615	0	1	71.6986	1	0	0	6	0	0	10580	51	1	2	PCI	1	1	1	0	1	0.254795	1
1616	0	2	56.2	1	0	1	0.999716	0	0	10520	36	1	2	PCI	1	1	1	1	1	1.20548	0
1617	1	2	84.0274	1	0	0	1.03027	0	0	3580	80	1	3	PCI	1	1	1	1	1	1.8	0
1618	0	2	68.337	1	0	1	1.3	0	0	1922	37	1	2	PCI	1	1	1	1	1	1.21644	0
1619	0	2	51.3479	0	0	0	1.1	0	0	718	47	1	0	PCI	1	1	1	1	0	0.605479	1
1620	0	2	50.2822	1	0	1	1.8	0	0	9760	52	1	3	PCI	1	0	1	1	1	1.76986	0
1621	0	2	71.7068	1	0	1	1.2	0	0	2820	30	1	2	PCI	1	1	1	1	1	1.75068	1
1622	0	2	45.526	1	0	1	1.3	0	0	444	37	1	0	PCI	1	1	1	1	0	1.83562	0
1623	0	1	80.1315	1	0	0	1.38112	0	0	2111.76	59	1	3	PCI	1	0	1	1	1	1.1863	0
1624	1	1	76.4055	1	0	0	1.44707	0	1	1328	65	1	3	PCI	1	1	1	1	0	3.31233	0
1625	1	1	64.989	0	0	1	0.8	0	0	1406	65	1	3	PCI	1	1	1	1	1	1.80548	0
1626	0	2	78.4959	0	1	0	0.937416	0	0	4200	44	1	3	PCI	1	1	1	0	1	1.13699	0
1627	0	2	66.9753	1	0	0	1.5669	0	0	1792	56	1	2	PCI	1	1	1	1	0	1.73973	0
1628	0	2	72.5753	0	0	1	1.2	0	0	3580	48	1	1	PCI	1	1	1	1	1	1.73425	0
1629	0	2	58.5507	1	1	1	1	0	0	2100	53	1	2	PCI	1	1	1	1	0	3.1589	0
1630	1	1	47.4575	1	1	1	0.7	0	0	1188	60	1	1	PCI	1	1	1	1	0	1.15068	0
1631	0	2	42.4055	1	0	1	0.9	0	0	6500	59	1	1	PCI	1	1	1	1	0	1.15342	0
1632	0	1	68.6767	1	0	0	1.66648	0	0	4702	41	1	2	PCI	1	1	1	1	0	1.64384	0
1633	0	1	72.6658	1	0	0	1.6	0	0	2900	41	1	3	PCI	1	1	1	1	1	2.92055	0
1634	0	2	90.8712	1	1	0	2.09899	0	0	5680	51	1	3	PCI	1	1	1	1	1	1.75068	0
1635	0	2	60.3918	0	0	1	1.3248	0	0	9900	16	1	2	PCI	1	1	0	1	1	1.07397	0
1636	0	2	76.5699	1	0	1	2.07303	1	0	1198	55	1	3	conservative	1	1	1	1	0	2.81918	0
1637	1	2	84.874	0	0	0	1.12178	0	0	1166.26	79	1	1	PCI	1	1	1	1	0	2.54247	1
1638	0	2	60.2658	1	1	1	1.47628	0	1	1434	27	1	3	conservative	1	1	1	1	1	0.468493	1
1639	0	2	64.4959	1	0	0	1.2	0	0	512	58	1	3	PCI	1	1	1	1	0	1.71507	0
1640	0	2	41.7425	1	0	1	1.1	0	0	160	75	1	1	PCI	1	0	1	1	0	1.69589	0
1641	0	1	56.2329	1	1	0	1.3	0	0	2400	54	1	0	PCI	1	1	1	1	0	1.16438	0
1642	0	2	48.0932	0	1	1	1	0	0	23000	50	1	2	PCI	1	1	1	1	0	1.88767	0
1643	0	2	32.6384	0	0	1	1.1	0	0	1164.98	57	1	1	PCI	1	1	0	1	0	3.11507	0
1644	0	1	63.9562	1	1	0	1.4	0	0	3640	52	1	3	PCI	1	1	1	1	1	3.0137	0
1645	0	2	62.0301	1	0	1	1.51537	0	0	198.141	41	1	2	PCI	1	1	1	1	0	2.73425	0
1646	1	1	71.0712	1	1	0	0.9	0	0	2820	64	1	1	PCI	1	1	1	1	0	2.81644	0
1647	0	2	63.9014	1	0	1	1.2	0	0	994	58	1	3	PCI	1	1	1	1	1	1.20822	0
1648	1	1	70.3178	1	0	0	1.1	0	0	682	61	1	1	PCI	1	1	1	1	0	1.67945	0
1649	0	1	59.1918	1	0	1	1.3	0	0	21800	32	1	3	PCI	1	1	1	1	1	2.99726	0
1650	1	2	75.6877	1	1	0	2.10885	0	0	922	28	1	0	conservative	1	1	1	1	1	3.09315	0
1651	0	1	75.1562	1	0	1	1.4	0	0	9690	58	1	0	PCI	1	0	1	1	1	1.63836	0
1652	0	1	66.9288	1	0	0	1.4	0	0	862	51	1	3	PCI	1	1	1	1	1	3.06301	0
1653	0	2	81.274	1	1	1	2.4181	0	0	4268.54	33	1	3	PCI	1	1	1	1	1	0.452055	1
1654	0	1	71.2247	1	0	0	1	0	0	9040	60	1	1	PCI	1	1	1	0	0	1.19726	0
1655	0	2	47.6	0	0	1	1.56057	0	0	1002	57	1	3	PCI	1	1	0	1	0	2.77534	0
1656	0	2	68.0192	1	0	1	1.1	0	0	1342.43	55	1	2	PCI	1	1	0	1	0	1.63014	0
1657	0	1	89.1068	1	0	0	1.73947	0	0	1074	48	1	3	PCI	1	1	1	0	0	1.09315	0
1658	0	2	80.6877	1	1	1	1.64806	0	0	832	81	1	2	PCI	1	1	1	1	1	1.6137	0
1659	1	1	81.5288	1	1	0	1.3	0	0	1960	70	1	1	PCI	1	1	1	0	1	0.109589	1
1660	1	2	94.8877	0	0	0	0.917958	0	0	2345.77	30	1	1	CABG	0	0	0	0	0	1.59178	0
1661	1	1	83.4055	1	0	0	1.38373	0	0	814.801	49	1	3	PCI	1	1	1	1	1	1.75068	1
1662	0	2	42.663	0	0	1	1.2	0	0	1037	69	1	1	PCI	1	1	1	1	0	1.10411	0
1663	0	1	68.1589	1	0	1	1.35781	0	0	3474.03	44	1	2	PCI	1	1	1	1	1	3.01644	0
1664	0	2	75.9342	1	1	1	1.1	0	1	904	41	1	3	PCI	1	1	1	1	0	0.780822	1
1665	0	2	84.1315	0	1	0	1.3	1	0	1390	26	1	3	PCI	1	1	1	1	1	0.0986301	1
1666	1	1	68.7616	1	0	0	1.04781	0	0	4142.13	64	1	3	PCI	1	1	1	1	1	1.63014	0
1667	1	2	94.2274	1	0	0	1.1	0	0	1340	52	1	2	PCI	1	1	1	1	1	1.60548	0
1668	0	2	66.2904	1	0	0	1	0	0	3806	38	0	2	PCI	1	1	1	1	0	1.85479	0
1669	0	2	54.1836	1	0	0	1	0	0	443	61	1	2	PCI	1	1	1	1	0	3.04658	0
1670	0	1	61.3233	1	0	0	1.1	0	0	360	58	1	3	PCI	1	1	1	1	1	1.5589	0
1671	0	2	74.1507	1	0	0	1.4	1	0	2690	63	1	3	PCI	1	1	1	1	1	1.55068	0
1672	1	2	79.9534	1	1	0	1	0	0	429	26	1	3	PCI	1	1	1	1	0	2.33425	0
1673	0	1	70.5123	1	0	0	1.3	0	0	2695.17	53	1	3	conservative	1	1	1	1	0	2.33151	0
1674	0	1	50.6685	0	0	1	1.4	0	0	4690	50	1	1	PCI	1	1	1	1	1	0.0136986	0
1675	1	1	74.189	0	0	0	0.9	0	0	6080	42	1	3	PCI	1	1	1	1	1	2.93699	0
1676	0	2	45.9452	0	0	1	1	1	0	1330	51	1	3	PCI	1	1	1	1	1	2.94521	0
1677	1	2	79.0192	1	0	0	0.7	0	0	1250	73	0	0	conservative	1	1	1	1	1	1.5589	0
1678	0	2	74.7836	1	0	1	1.3	0	0	2590	27	1	3	PCI	1	1	1	1	1	1.11781	0
1679	0	2	61.9973	1	0	0	1.2	1	0	379	45	1	2	PCI	1	1	1	1	0	2.91233	0
1680	0	2	81.5041	1	0	0	1.2	0	1	788	29	1	3	PCI	1	1	0	1	1	1.56164	0
1681	0	2	34.9589	0	0	1	1.2	1	0	2090	60	1	3	PCI	1	1	1	1	1	1.75068	0
1682	0	2	72.389	0	1	0	3.8	1	0	2380	41	1	3	PCI	0	0	0	0	0	1.18356	0
1683	0	1	56.3096	1	0	0	1.2	0	0	335	49	1	1	PCI	1	1	1	1	0	2.89589	0
1684	0	2	49.7918	1	0	1	1.1	0	0	738	57	1	2	PCI	1	1	1	1	0	1.50411	0
1685	0	2	45.1205	0	0	1	1	0	0	1860	49	1	1	PCI	1	1	1	1	0	2.75616	0
1686	0	2	71.1014	0	0	1	0.9	0	0	2410	60	1	2	PCI	1	1	1	1	0	2.89863	0
1687	0	2	37.1644	1	0	1	1	1	0	6046.37	65	1	1	PCI	1	1	1	1	0	2.69041	0
1688	0	2	79.1151	1	0	1	1.1	1	0	1470	53	1	2	PCI	1	1	1	1	0	1.47397	0
1689	1	1	78.274	1	0	0	1.1	0	0	1230	37	1	1	PCI	1	1	1	1	1	1.49863	0
1690	0	2	57.3863	1	1	1	1	0	0	306	61	1	3	PCI	1	1	1	1	0	1.55616	0
1691	0	1	81.4548	1	1	0	1.6	0	1	2849.69	32	1	3	PCI	1	1	1	1	1	2.86849	0
1692	0	2	57.6877	1	1	0	1.4	1	1	204	28	1	1	PCI	0	0	0	0	0	2.89863	0
1693	0	1	51.5836	0	0	1	1	0	0	650	57	1	3	PCI	1	1	1	1	0	2.89863	0
1694	1	1	73.4192	0	0	0	0.8	0	0	4360	36	1	1	PCI	1	1	1	1	1	2.88493	0
1695	0	1	43.2301	0	0	1	1.3	0	0	1400	65	1	2	PCI	1	1	1	1	0	2.70137	0
1696	1	1	77.0438	0	0	0	1.2	0	0	6050	30	1	3	PCI	1	1	0	0	1	2.07945	1
1697	1	1	68.9781	1	1	0	0.7	0	0	370	33	1	1	PCI	1	1	1	1	1	1.53973	0
1698	1	1	84.6411	1	1	0	1.8	1	0	528	43	1	3	PCI	1	1	0	1	1	0.290411	1
1699	0	1	75.1452	1	0	1	1.1	0	0	4590	37	1	3	PCI	1	1	1	1	1	2.53973	0
1700	1	1	75.2027	1	0	1	1	0	0	2650	59	1	2	PCI	1	1	1	1	1	1.65205	0
1701	0	2	62.2877	0	0	1	1	0	0	2880	55	1	1	PCI	1	1	1	1	1	2.68219	0
1702	0	2	54.4493	1	0	1	0.8	0	0	2530	32	1	1	PCI	1	1	1	1	0	1.98356	0
1703	0	1	83.2767	1	0	0	0.9	0	0	1015	64	1	3	PCI	1	1	1	1	0	1.09863	0
1704	0	1	68.3589	1	0	0	1.2	0	0	2960	46	1	2	PCI	1	1	1	1	0	1.11781	0
1705	0	2	68.8219	1	1	1	1	0	0	3070	44	1	2	PCI	1	1	1	1	0	2.89041	0
1706	0	2	46.7096	1	0	0	1.3	0	0	330	46	1	1	PCI	1	1	0	1	0	2.52877	0
1707	0	2	46.063	1	0	1	0.9	0	0	2420	54	1	1	PCI	1	1	1	1	0	2.66301	0
1708	0	1	75.926	1	0	0	1.1	0	0	2720	65	1	2	PCI	1	1	1	1	1	2.64658	0
1709	1	1	80.6466	1	0	0	1.6	0	0	1695	30	1	1	PCI	1	1	1	1	1	2.8274	0
1710	1	1	72.8219	1	0	0	0.9	0	0	4349.7	24	1	1	PCI	1	1	1	1	1	2.66301	0
1711	0	2	46.4548	1	0	1	1.1	0	0	2870	57	1	1	PCI	1	1	1	1	1	1.08767	0
1712	0	2	67.6137	1	1	1	1.1	0	0	7690	24	1	3	PCI	1	1	0	1	1	0.189041	1
1713	0	2	73.6082	0	0	0	1.1	0	0	1320	51	1	1	PCI	1	1	1	1	0	2.6274	0
1714	0	1	73.1452	1	1	1	1	0	1	1040	38	1	3	PCI	1	1	1	1	1	2.7589	0
1715	0	1	66.3151	0	1	1	1.2	0	0	475	56	1	3	PCI	1	1	1	1	0	1.8137	0
1716	0	2	72.4411	1	0	1	0.8	0	0	488	62	1	3	PCI	1	1	1	1	0	2.76712	0
1717	1	1	80.0164	1	1	1	2.2	0	0	1420	55	1	3	PCI	1	1	1	1	1	1.77808	0
1718	1	1	75.4986	1	0	0	0.9	0	0	359	65	1	2	PCI	1	1	1	1	0	1.74795	0
1719	0	2	89.0247	1	1	1	1.7	1	0	450	34	1	3	PCI	1	1	1	1	1	2.68493	0
1720	0	2	60.8438	1	1	0	1	0	0	894	48	1	2	PCI	1	1	1	1	0	2.73699	0
1721	0	2	65.1616	1	1	1	1	0	0	749	48	1	3	PCI	1	1	1	1	0	2.23836	0
1722	0	2	61.4301	1	0	1	1.3	0	0	3571.48	52	1	2	PCI	1	1	1	1	0	2.7589	0
1723	0	2	87.1781	1	1	0	1.3	0	0	498	65	1	1	PCI	1	1	0	1	1	1.2274	0
1724	0	2	65.4082	1	0	0	1	1	0	599	54	1	3	PCI	1	1	1	1	1	2.59726	0
1725	0	2	46.9425	0	0	0	1.4	0	0	3070	68	1	2	PCI	1	1	1	1	0	1.32877	0
1726	1	1	64.137	1	0	0	1	0	0	294	58	1	1	PCI	1	1	1	1	1	1.14795	0
1727	1	2	79.0301	1	1	0	0.8	0	0	617	80	1	2	PCI	1	1	1	1	0	1.33151	0
1728	0	2	52.4274	1	0	1	1	0	0	998	63	1	2	PCI	1	1	1	1	0	2.75342	0
1729	0	1	50.2356	1	0	0	1.2	0	0	3520	43	1	3	PCI	1	1	1	1	0	2.55068	0
1730	0	2	66.5123	1	0	1	1.2	0	0	2440	33	1	3	PCI	1	1	1	1	1	1.93973	0
1731	0	2	80.9973	0	0	1	0.800757	0	1	470	40	1	3	CABG	1	0	0	1	1	1.27945	0
1732	0	1	44.2411	0	0	1	1.1	0	0	117	60	1	1	PCI	1	1	1	1	0	1.29863	0
1733	0	2	97.4959	1	0	0	1.3	0	0	490	46	1	0	PCI	0	0	0	0	0	2.53425	0
1734	0	2	43.9726	0	0	1	0.9	0	0	1563	46	1	1	PCI	1	1	1	1	0	2.68219	0
1735	1	1	58.0932	1	0	1	0.9	0	0	33	49	1	1	PCI	1	1	1	1	0	1.09863	0
1736	1	1	65.9123	1	0	0	0.8	0	0	1923.16	77	1	1	PCI	1	1	1	1	0	2.54521	0
1737	0	2	47.1315	0	0	1	1.1	0	0	575	62	1	1	PCI	1	1	0	1	0	2.64658	0
1738	0	2	48.7096	1	0	1	1	0	0	4000	53	1	1	PCI	1	1	1	1	0	2.43836	0
1739	1	1	79.3507	0	1	0	1.6	0	0	200	56	1	2	PCI	1	1	1	1	1	1.1726	0
1740	0	1	77.2192	1	0	0	1.2	0	0	745	55	1	3	PCI	1	1	1	1	1	2.65205	0
1741	0	2	37.326	1	0	1	1.1	0	0	4309	55	1	1	PCI	1	1	1	1	0	2.52055	0
1742	0	2	63.6795	1	0	0	1	0	0	3533.81	28	1	2	PCI	1	1	0	1	1	1.27397	0
1743	1	1	47.0822	0	0	1	0.6	0	0	1980	34	1	1	PCI	1	1	1	1	1	1.78356	0
1744	1	2	80.2164	1	1	0	1.64412	0	0	2366.77	30	1	3	PCI	1	1	1	1	1	1.43562	1
1745	0	1	60.674	1	0	0	1.1	0	0	941	46	1	3	PCI	1	1	1	1	0	2.51781	0
1746	0	1	85.1808	0	0	0	1.6	0	0	1530	41	1	2	PCI	1	1	1	1	1	2.6274	0
1747	0	1	82.3836	1	1	0	1.2	0	0	752	52	1	3	PCI	1	0	0	0	0	2.61918	0
1748	0	2	36.5205	1	0	1	1.2	0	0	5880	48	1	1	PCI	1	1	1	1	1	1.51233	0
1749	1	1	85.5918	1	1	0	3.1	0	0	1120	62	1	3	PCI	1	1	1	1	1	2.59726	0
1750	1	1	50.0658	1	0	0	1.1	0	0	2860	38	1	3	PCI	1	1	1	1	0	2.31507	0
1751	0	1	76.8	1	0	0	1.6	0	0	493	53	1	2	PCI	1	1	1	1	0	2.2274	0
1752	0	2	54.9918	0	0	1	1.3	0	0	4410	39	1	3	PCI	1	1	1	1	0	2.59178	0
1753	0	2	72.6712	1	0	1	1.2	0	0	367	60	1	3	PCI	1	1	1	1	0	2.58082	0
1754	0	2	48.2219	0	0	1	1.3	0	0	1800	61	1	1	PCI	1	1	1	1	0	2.57808	0
1755	1	1	78.1699	1	0	1	1	0	0	509	51	1	2	PCI	1	1	1	1	0	2.59452	0
1756	0	1	73.1753	1	0	0	1.2	0	0	1340	50	1	3	PCI	1	1	1	1	0	2.4411	0
1757	0	2	66.9534	0	0	0	1.6	0	0	3606	34	1	2	PCI	1	1	1	1	0	1.41096	0
1758	0	2	49.7699	1	0	1	1.4	0	0	1790	51	1	2	PCI	1	1	1	1	0	2.43562	0
1759	0	1	73.9425	1	1	0	1.1	1	0	512	41	1	3	PCI	1	1	1	1	1	1.09315	0
1760	0	1	74.6904	0	0	0	1.3	0	0	1170	54	1	2	PCI	1	1	1	1	0	1.22192	0
1761	1	1	80.7342	1	0	0	0.8	0	0	510	62	1	3	PCI	1	1	1	1	0	3.91781	0
1762	0	2	50.4658	1	0	1	1.2	0	0	3408	44	1	2	PCI	1	1	1	1	0	4.51507	0
1763	0	1	78.3178	1	0	0	1.1	0	1	2735.25	57	1	3	PCI	1	1	1	1	1	2.09589	1
1764	0	1	73.6877	1	0	0	1.8	0	1	2490	46	1	3	PCI	1	1	0	1	1	1.53699	1
1765	1	1	43.3507	0	0	1	0.7	0	0	1348	73	1	2	PCI	1	1	1	1	0	4.19726	0
1766	1	1	56.6658	0	0	1	1.1	1	0	1562	55	1	3	PCI	1	1	1	1	0	5	0
1767	0	2	40.0384	1	0	1	1.2	0	0	2690	63	1	2	PCI	1	1	1	1	0	5	0
1768	0	2	53.4274	1	0	1	1	0	0	2578	49	1	1	Lysis	1	1	1	1	0	4.41096	0
1769	0	2	60.5507	1	0	1	0.9	0	0	1398	62	1	3	PCI	1	1	1	1	0	3.98356	0
1770	0	2	50.6521	1	0	0	2.1	1	0	1214	53	1	3	PCI	1	1	1	1	1	4.50137	0
1771	0	2	38.6603	0	0	1	1.4	0	0	986	35	1	3	PCI	1	1	1	1	1	3.97808	0
1772	0	2	66.0027	0	1	0	1.3	1	0	2162.14	59	1	3	PCI	1	0	1	1	0	3.91233	0
1773	0	2	46.0274	1	0	1	1.4	1	0	2730	32	1	2	PCI	1	1	1	1	1	3.91233	0
1774	0	2	38.874	1	0	1	0.9	0	0	878	59	1	1	PCI	1	1	1	1	0	4.27123	0
1775	0	2	76.674	1	0	0	1.2	1	0	1900	52	1	3	PCI	1	1	1	1	0	5	0
1776	0	2	56.811	1	0	1	1.3	0	1	2634	56	1	2	PCI	1	1	1	1	0	5	0
1777	1	1	65.2822	1	0	1	0.8	0	0	5002	41	1	3	PCI	1	1	1	1	1	4.55342	0
1778	0	2	53.1836	1	0	1	1.1	0	0	2342	57	1	3	PCI	1	1	1	1	1	5	0
1779	0	2	67.8055	1	1	0	1.6	1	0	1040	43	1	3	CABG	1	1	1	1	0	0.416438	1
1780	0	2	52.6356	1	1	0	1	0	0	3800	53	1	2	Lysis	1	1	1	1	1	5	0
1781	1	1	79.5178	1	1	0	1.9	0	1	5530	50	1	3	PCI	1	1	1	1	1	0.679452	1
1782	1	1	47.5836	1	0	0	0.730933	0	0	6548	56	1	2	PCI	1	1	1	1	1	4.35342	0
1783	0	1	61.7616	1	0	0	1.3	0	0	1022	70	1	3	PCI	1	1	1	1	0	4.51233	0
1784	0	2	45.6438	1	0	0	1.2	0	0	2289.12	72	1	1	PCI	1	1	1	1	0	4.58356	0
1785	0	2	64.674	0	0	0	1	0	0	2176	39	1	1	PCI	1	1	1	1	0	3.7863	0
1786	0	2	53.063	1	0	1	1.1	0	0	1726	64	1	2	PCI	1	1	1	1	0	4.42466	0
1787	1	1	81.6822	0	1	1	1.6	0	0	2926	48	1	3	PCI	0	1	1	1	1	0.183562	1
1788	0	2	56.6849	1	1	1	1.2	0	0	2298	45	1	2	PCI	1	1	1	1	1	3.88493	0
1789	0	1	61.9616	1	0	0	1.1	0	0	1606	63	1	3	PCI	1	1	1	1	1	3.8137	0
1790	0	2	51.8548	0	0	1	1.3	1	0	560	43	1	2	PCI	1	1	1	1	0	5	0
1791	0	1	67.7151	0	0	1	1.3	0	0	664	53	1	3	PCI	1	1	1	1	0	3.8	0
1792	1	1	60.8493	1	0	0	0.8	0	0	1078	47	1	1	PCI	1	1	1	1	0	3.97534	0
1793	0	2	53.9151	1	0	1	0.9	0	0	544	66	1	3	PCI	1	1	1	1	0	4.75616	0
1794	0	2	64.8274	0	0	1	1.1	0	0	1426	75	1	2	PCI	1	1	1	1	0	4.31781	0
1795	0	2	52.8849	1	0	0	1	0	0	230	54	1	3	PCI	1	1	1	1	0	4.57534	0
1796	1	1	58.8849	1	0	0	0.9	0	0	1500	62	1	1	PCI	1	1	1	1	0	4.64658	0
1797	0	2	61.3342	1	1	1	0.8	0	0	826	71	1	2	PCI	1	1	1	1	0	3.76438	0
1798	1	1	71.4411	1	0	0	1.1	0	0	1062	44	1	2	PCI	1	1	1	1	1	5	0
1799	1	1	79.9507	1	0	0	1.3	0	0	1488	27	1	3	conservative	1	0	0	1	0	0.109589	1
1800	0	2	66.3836	0	0	1	1.49154	0	0	380	81	1	3	PCI	1	1	1	1	0	4.18082	0
1801	1	1	55.2164	1	0	1	1.31092	0	0	350	59	1	1	PCI	1	1	1	0	1	4.24384	0
1802	0	2	43.6055	1	0	1	1.1	0	0	2624	48	1	2	PCI	1	1	1	1	0	3.13425	0
1803	0	2	82.0329	0	1	1	1.3737	1	0	1736	21	1	3	PCI	1	1	1	1	1	2.2137	1
1804	1	1	76.5781	1	0	1	1	0	0	990	55	1	1	PCI	1	1	1	1	0	4.29315	0
1805	0	2	87.7699	1	0	0	1.3	0	1	358	39	1	1	PCI	1	1	0	0	1	4.92603	0
1806	0	2	53.8384	1	0	1	0.938678	0	0	1396	61	1	1	PCI	1	1	1	1	0	5	0
1807	1	1	58.4466	1	1	0	0.8	0	0	880	55	1	3	PCI	1	1	1	1	0	5	0
1808	0	2	64.9644	1	0	1	1.42469	0	0	862	61	1	3	PCI	1	1	1	1	1	3.49041	1
1809	1	1	45.2986	0	0	1	1.55303	0	0	2150	55	1	3	PCI	1	1	1	1	0	5	0
1810	0	2	30.2082	0	0	0	0.531746	0	0	3204	44	1	1	PCI	1	1	1	1	0	5	0
1811	1	1	30.926	1	0	1	0.901688	0	0	1958	51	1	2	PCI	1	1	1	1	0	5	0
1812	0	1	73.1397	1	0	0	1.76292	0	0	100	45	1	2	PCI	1	1	1	0	0	5	0
1813	1	1	54.7753	1	0	0	1.28317	0	0	2640	59	1	1	PCI	1	1	1	1	1	5	0
1814	0	2	46.1589	1	0	0	1.15408	1	0	768	43	1	2	PCI	1	1	1	1	1	5	0
1815	1	2	74.3836	0	1	0	1.2	1	0	3138	41	1	2	PCI	1	1	1	0	0	1.00274	1
1816	0	2	46.8795	0	0	1	1.5655	0	0	1202	60	1	3	PCI	1	1	1	1	1	5	0
1817	0	2	53.0164	0	0	0	0.838707	0	0	1534	55	1	1	PCI	1	1	1	1	0	5	0
1818	0	2	49.2712	0	0	1	1.03402	1	0	6218	27	1	3	PCI	1	1	1	0	0	0.852055	0
1819	0	2	73.9589	1	0	0	1.69187	1	0	1052	37	1	2	PCI	1	1	1	1	1	5	1
1820	0	2	58.7589	1	0	1	1.61715	0	0	148	61	1	2	PCI	1	1	1	1	0	5	0
1821	0	2	60.9836	1	0	1	1.04111	0	0	508	64	1	3	PCI	1	0	0	0	0	3.65205	0
1822	0	2	46.0493	0	0	1	1.32223	0	0	608	60	1	3	PCI	1	1	1	1	0	5	0
1823	1	1	57.6329	0	0	1	0.82819	0	0	5182	33	1	1	PCI	1	1	1	0	0	5	0
1824	1	1	55.9534	1	0	0	0.96168	0	0	2306	64	1	1	PCI	1	1	1	1	0	5	0
1825	0	2	56.2356	0	0	1	1.00898	0	0	1908	66	1	1	PCI	1	1	1	1	0	5	0
1826	0	2	64.3151	0	0	0	1.24279	0	1	536	25	1	1	PCI	1	1	1	0	1	5	0
1827	1	1	63.726	0	0	0	0.894029	0	0	348	56	1	3	PCI	1	1	1	1	0	5	0
1828	0	2	79.5699	0	1	0	2.33032	0	0	9804	30	1	3	PCI	1	1	0	0	0	0.10137	1
1829	1	1	72.6767	1	0	0	0.680016	0	0	1448	53	1	3	PCI	1	1	1	0	1	1.88493	1
1830	0	2	54.5753	0	0	1	0.69598	0	0	380	30	1	1	PCI	1	1	1	1	1	3.16986	1
1831	1	1	68.6384	1	0	0	1.44882	0	1	254	58	1	2	PCI	1	0	1	1	1	5	0
1832	0	2	63.9616	1	0	0	2.45973	1	1	294	30	1	2	PCI	1	1	1	0	1	3.06027	1
1833	0	2	51.4603	1	0	0	1.24661	0	0	958	51	1	3	PCI	1	1	1	1	0	5	0
1834	0	1	67.7096	1	0	0	1.35463	0	0	2342	45	1	1	PCI	1	1	1	1	1	5	0
1835	0	2	64.5644	1	1	0	1.56536	0	1	240	37	1	3	PCI	1	1	1	1	0	5	0
1836	0	2	69.7726	1	0	1	1.35752	0	0	11896	56	1	1	PCI	1	1	1	1	1	5	0
1837	0	2	56.4137	0	0	1	1.16152	0	0	3590	48	1	1	PCI	1	1	1	1	0	5	0
1838	1	1	72.9096	1	0	0	0.894611	0	0	256	39	1	1	PCI	1	1	1	1	0	5	0
1839	1	2	61.0438	0	1	0	1.8902	0	1	5195.33	34	1	3	conservative	1	0	1	0	1	0.134247	1
1840	0	2	52.8274	1	1	1	0.9	0	0	2392	53	1	3	PCI	1	1	1	0	0	5	0
1841	1	1	72.1123	1	1	0	0.7	0	0	2400	50	1	2	PCI	1	1	1	0	0	0.950685	1
1842	1	1	60.6192	0	0	0	1.06143	0	0	4520	55	1	1	PCI	1	1	1	1	0	5	0
1843	1	1	60.6959	1	0	0	0.931932	0	0	232	65	1	1	PCI	1	1	0	0	1	5	0
1844	1	1	61.6027	1	0	0	0.960234	0	0	2663.2	60	1	1	PCI	1	1	0	1	0	5	0
1845	1	1	74.989	0	0	0	1.1632	0	0	2312	29	1	2	PCI	1	0	1	1	1	5	0
1846	0	2	64.2904	1	0	1	1.52617	0	0	188	45	1	1	PCI	1	1	1	1	0	5	0
1847	1	1	67.1699	1	0	0	1.75875	0	0	560	51	1	1	PCI	1	1	0	1	1	5	0
1848	1	1	58.4137	1	0	0	0.905226	0	0	1106	47	1	2	PCI	1	1	1	1	1	5	0
1849	0	2	48.189	1	0	1	1.68475	1	0	4737.48	69	1	3	PCI	1	1	1	1	0	4.53699	1
1850	0	2	73.1096	0	0	0	1.78214	0	0	6648	14	1	2	PCI	1	1	1	0	0	4.20274	1
1851	0	2	43.5836	0	0	0	1.66173	0	0	11680	45	1	2	PCI	1	1	0	0	0	5	0
1852	1	1	65.0493	1	0	0	1.23638	0	0	2602	61	1	1	PCI	1	1	1	1	1	5	0
1853	1	1	69.4219	1	1	0	0.9	0	0	930	60	1	2	PCI	1	1	0	0	1	5	0
1854	0	1	59.1945	1	0	1	1.26703	0	0	362	46	1	1	PCI	1	0	1	1	0	5	0
1855	0	2	59.3671	0	0	0	1.76391	1	1	3032	19	1	2	PCI	1	1	1	1	1	5	0
1856	0	2	82.0932	1	1	1	1.43309	0	0	4615.59	61	1	2	PCI	1	1	1	1	1	5	0
1857	0	2	62.5781	1	0	1	1.45495	0	0	700	64	1	1	PCI	1	1	1	1	1	5	0
1858	0	2	71.9315	0	0	1	1.72215	0	0	928	55	1	3	PCI	1	0	1	1	0	5	0
1859	0	1	73.3562	1	1	0	1.82357	0	1	1180	36	1	3	PCI	1	0	1	1	1	5	0
1860	1	1	76.063	1	0	1	0.6	0	0	1028	47	1	3	PCI	1	1	1	0	0	5	0
1861	0	2	45.0904	1	0	1	0.680087	0	0	560	61	1	1	PCI	1	1	1	1	0	5	0
1862	0	2	72.1342	1	0	1	1.7248	0	1	1992	41	1	2	PCI	1	1	0	0	1	2.09863	1
1863	0	2	36.3315	1	0	0	1.66639	0	0	1146	69	1	1	PCI	1	1	0	1	0	5	0
1864	0	2	69.0685	0	0	1	1.02439	0	0	2414	60	1	3	PCI	1	0	1	0	0	5	0
1865	0	2	55.6959	0	0	1	1.59615	0	0	1388	61	1	2	PCI	1	1	0	0	0	5	0
1866	0	1	51.7178	1	0	1	0.829176	0	0	5200	55	1	1	PCI	1	1	1	1	1	5	0
1867	0	2	43.1205	0	1	1	0.9	0	0	270	65	1	2	PCI	1	1	1	1	0	5	0
1868	0	1	47.6932	0	0	1	1.17019	1	0	3000	45	1	3	PCI	1	1	1	1	0	4.96164	0
1869	0	2	64.8877	0	0	1	1.08712	0	0	3500	48	1	1	PCI	1	1	1	1	0	1.76164	1
1870	0	2	63.6411	1	0	0	1.54799	0	0	340	69	1	1	PCI	1	1	1	1	0	5	0
1871	0	2	57.7397	0	0	1	1.38106	0	0	6188	40	1	1	PCI	1	1	1	1	1	5	0
1872	0	1	71.2137	1	0	0	1.57415	0	0	2340	61	1	2	PCI	1	1	1	1	0	5	0
1873	1	1	58.8	1	0	1	1.70392	0	0	144	60	1	1	PCI	1	1	1	0	0	5	0
1874	0	2	61.3397	1	0	1	1.88388	0	0	5020	46	1	3	PCI	1	1	1	0	0	0.668493	1
1875	0	2	54.8904	0	0	1	0.890697	0	0	11708	46	1	1	PCI	1	1	1	1	1	5	0
1876	0	2	61.4822	0	1	1	1.6741	0	1	1520	58	1	1	PCI	1	1	1	1	1	5	0
1877	0	2	64.5973	0	0	1	1.70912	0	0	3146	18	1	1	conservative	0	0	0	1	0	0.660274	1
1878	0	2	60.8603	1	0	1	0.880123	1	0	542	60	1	3	PCI	1	1	1	1	0	5	0
1879	0	1	71.9699	1	1	0	1.5	1	0	434	44	1	3	PCI	1	1	1	0	1	2.79452	1
1880	0	2	63.2575	0	0	0	0.567684	0	1	5520	49	1	1	PCI	1	1	1	0	1	5	0
1881	0	2	65.337	1	0	1	1.73957	0	0	3200	49	1	1	PCI	1	1	1	1	1	5	0
1882	0	2	74.0055	1	0	1	0.699669	0	0	212	52	1	2	PCI	1	1	1	1	0	4.69589	1
1883	0	2	63.0521	1	0	0	1.14073	1	0	166	65	1	3	PCI	1	0	0	0	0	5	0
1884	0	2	57.6603	0	0	0	2.80376	0	0	374	60	1	2	PCI	1	1	1	0	0	1.42192	0
1885	1	1	81.8301	1	1	0	0.8	0	0	636	41	1	1	PCI	1	1	1	1	1	5	0
1886	1	1	44.0658	1	0	1	1.40727	0	0	600	54	1	1	PCI	1	1	1	1	0	5	0
1887	0	2	61.2822	0	0	1	1.34387	0	0	582	67	1	3	PCI	1	1	1	1	0	2.79452	1
1888	0	1	70.7726	1	0	0	1.58626	0	0	1174	63	1	2	PCI	1	1	1	1	1	5	0
1889	0	2	60.6521	0	0	0	1.57371	0	0	1434	63	1	3	PCI	1	1	1	1	0	0.882192	1
1890	0	2	51.2082	1	0	0	1.15239	0	0	848	64	1	3	CABG	1	1	0	1	0	5	0
1891	0	1	73.2137	1	0	1	0.61185	0	0	294	53	1	3	PCI	1	1	1	1	0	5	0
1892	0	1	74.0192	1	0	0	1.38311	0	0	1000	52	1	1	PCI	1	1	1	1	1	5	0
1893	0	2	45.7562	1	0	1	1.91426	1	0	840	63	1	3	PCI	1	1	1	1	0	5	0
1894	1	1	68.9781	1	0	1	1.29122	0	0	1876	55	1	1	PCI	1	1	1	1	1	5	0
1895	0	2	78.3699	0	0	0	1	1	0	1040	53	1	3	PCI	1	1	1	1	1	5	0
1896	0	1	42.589	1	0	1	1.01895	0	0	754	54	1	1	PCI	1	1	1	1	0	5	0
1897	1	1	83.4192	1	1	0	1.9	0	0	632	32	1	3	PCI	1	1	1	0	1	1.6	1
1898	1	1	74.8027	1	0	0	0.819253	0	0	1100	45	1	1	PCI	1	1	1	0	0	5	0
1899	0	2	75.3178	1	0	1	0.743929	0	0	2240	48	1	1	PCI	1	1	0	0	1	5	0
1900	0	2	74.0712	1	0	0	1.27428	1	0	5034	48	1	2	PCI	1	0	1	1	1	5	0
1901	0	2	42.2192	0	0	1	0.555879	0	0	3820	48	1	3	PCI	1	1	1	1	0	5	0
1902	0	2	55.5068	1	0	1	0.688183	0	0	6234	60	1	3	PCI	1	1	1	1	0	5	0
1903	1	1	61.1507	1	0	1	1.18397	0	0	1232	26	1	3	PCI	1	1	1	0	1	5	0
1904	0	1	64.9425	1	0	1	1.43969	0	0	182	75	1	1	PCI	1	1	1	0	0	5	0
1905	0	2	69.2904	1	0	1	1.32932	1	0	632	62	1	3	PCI	1	1	1	1	0	5	0
1906	0	2	62.9781	1	0	1	1.86402	0	0	3100	58	1	2	PCI	1	1	1	1	1	4.85479	0
1907	0	2	55.5781	1	0	0	2.32083	0	0	790	64	1	1	PCI	1	1	1	1	0	5	0
1908	1	1	52.2301	1	0	1	0.806907	0	0	326	63	1	1	PCI	1	1	1	0	0	5	0
1909	0	1	71.1699	0	0	0	1.81244	0	0	814	51	1	1	conservative	1	1	1	0	0	5	0
1910	0	2	69.411	1	0	1	1.3223	0	0	1556	64	1	2	PCI	1	1	1	1	1	5	0
1911	0	1	57.6466	1	0	0	1.71475	0	0	4160	46	1	1	PCI	1	1	1	1	0	5	0
1912	0	2	56.6274	0	0	1	1.4184	0	0	1832	54	1	2	PCI	1	1	1	0	0	5	0
1913	0	1	67.5068	0	0	1	1.33878	0	0	1654	51	1	2	PCI	1	1	1	1	0	5	0
1914	0	2	53.2575	1	1	0	1	0	0	260	52	1	2	PCI	1	1	1	0	0	5	0
1915	1	1	72.3233	1	1	0	0.7	0	0	4404	53	1	2	PCI	1	1	1	0	1	5	0
1916	1	1	57.263	1	0	0	1.25469	0	0	1022	64	1	2	PCI	1	1	1	1	0	5	0
1917	0	1	70.3342	1	0	0	0.613465	0	0	504	60	1	3	PCI	1	1	1	1	1	5	0
1918	0	2	60.3288	1	0	0	0.909161	0	0	4600	45	1	2	PCI	1	1	1	1	0	5	0
1919	0	2	50.3178	1	1	0	0.7	1	0	493	55	1	3	PCI	1	1	1	1	1	2.49863	0
1920	0	2	66.0055	1	1	0	1	1	0	540	77	1	3	PCI	1	1	1	0	0	5	0
1921	1	2	83.0137	0	0	1	1.2	0	0	2734	68	1	1	PCI	1	1	1	1	1	5	0
1922	0	2	58.5288	1	0	0	0.795882	0	0	738	52	1	2	PCI	1	1	1	1	1	5	0
1923	0	2	68.2658	0	0	1	1.5977	0	0	694	53	1	1	PCI	1	1	1	1	1	5	0
1924	0	2	51.1945	0	1	1	1	1	0	444	27	1	3	PCI	1	1	1	1	1	5	0
1925	0	1	66.4	1	0	0	1.23189	0	0	1146	72	1	1	PCI	1	1	1	1	0	5	0
1926	0	1	61.1233	0	0	1	2.01957	0	0	4000	54	1	1	PCI	1	1	0	0	0	5	0
1927	1	1	66.5425	1	1	0	1.13733	0	1	638	62	1	3	PCI	1	1	1	1	1	5	0
1928	0	1	74.0329	1	0	0	1.68062	0	1	688	41	1	3	PCI	1	1	1	1	1	5	0
1929	0	2	60.9945	1	1	0	1	1	0	928	43	1	1	conservative	1	1	1	0	0	5	0
1930	0	1	68.6575	1	0	0	1.30434	0	0	1458	66	1	3	PCI	1	1	1	1	0	5	0
1931	0	2	73.9068	0	1	0	0.9	1	0	1180	24	1	1	PCI	1	1	0	1	1	1.23288	1
1932	1	1	57.9671	0	0	1	0.967183	0	0	38	63	1	1	PCI	1	1	1	1	0	5	0
1933	0	2	50.1808	0	1	0	0.8	0	0	1304	55	1	2	PCI	1	1	1	0	0	5	0
1934	0	1	77.7178	1	0	0	1.07983	0	0	226	67	1	2	PCI	1	1	1	1	1	4.53973	0
1935	0	2	69.5781	1	0	1	2.2807	0	0	1366	48	1	3	PCI	1	0	1	0	1	5	0
1936	1	1	78.5863	0	0	0	0.8	0	0	1460	58	1	3	PCI	1	1	1	1	1	0.216438	1
1937	1	1	65.7753	0	0	1	1.06798	0	0	4400	28	1	1	PCI	1	1	1	1	0	5	0
1938	1	1	76.1068	1	0	0	0.7	0	0	1200	44	1	3	PCI	1	1	1	0	1	5	0
1939	0	1	71.8822	0	0	0	1.90833	0	0	280	48	1	3	PCI	1	1	1	1	0	5	0
1940	1	1	82.5068	0	0	0	0.4	0	0	956	44	1	2	PCI	1	1	1	1	1	5	0
1941	1	1	70.9562	1	0	0	1.84742	0	0	9758	35	1	2	PCI	1	1	1	1	1	1.10137	1
1942	1	1	76.4055	1	0	0	0.9	0	0	126	46	1	2	PCI	1	1	1	1	1	5	0
1943	0	2	45.0658	0	0	1	1.3246	0	0	982	75	1	1	PCI	1	1	1	1	0	5	0
1944	1	1	64.2685	1	0	0	0.69635	1	0	954	44	1	3	PCI	1	1	1	1	1	5	0
1945	0	1	69.6548	0	0	0	1.99487	0	0	2276	30	1	3	PCI	1	0	1	1	1	0.0849315	1
1946	1	2	44.2822	1	0	0	1.30492	0	0	340	61	1	0	conservative	1	1	0	0	0	5	0
1947	0	2	63.8575	1	1	1	0.8	0	0	1696	52	1	3	PCI	1	1	1	1	0	5	0
1948	0	2	60.0603	1	0	1	1.09293	0	0	2354	45	1	3	PCI	1	1	1	1	1	5	0
1949	1	1	56.8329	1	1	1	0.9	0	0	2412	49	1	2	PCI	1	1	1	1	0	1.72603	0
1950	1	1	56.0548	0	0	0	0.853567	0	0	800	60	1	3	PCI	1	0	1	0	1	5	0
1951	0	2	70.6356	1	1	1	1.3	0	0	654	39	1	3	PCI	1	1	1	1	1	5	0
1952	0	2	42.3014	1	1	1	0.9	0	0	3132	58	1	1	PCI	1	1	1	0	0	5	0
1953	0	2	28.0548	0	0	0	1.24856	0	0	4610	26	1	1	PCI	1	1	1	1	1	5	0
1954	0	1	79.0027	1	0	0	1.2734	0	1	750	52	1	1	PCI	1	1	1	1	0	3.5589	0
1955	0	2	54.9068	1	0	0	1.17683	0	0	2476	46	1	2	PCI	1	1	1	1	0	5	0
1956	0	2	36.7342	1	0	1	1.30596	0	0	952	71	1	2	PCI	1	1	1	1	0	5	0
1957	0	2	57.5452	1	0	1	0.647929	0	0	674	57	1	3	PCI	1	0	1	1	0	5	0
1958	0	2	46.9699	0	0	1	1.07908	0	0	812	73	1	1	PCI	1	1	1	1	0	5	0
1959	0	1	78.1534	1	0	0	0.743282	0	0	1062	53	1	1	PCI	1	1	1	1	0	5	0
1960	0	2	57.4164	1	0	0	0.965748	0	0	352	62	1	3	CABG	1	1	1	1	1	5	0
1961	1	1	65.6658	1	1	0	0.9	0	0	2160	48	1	1	PCI	1	1	1	1	1	5	0
1962	0	1	52.0055	0	0	1	0.915547	0	0	144	73	1	3	PCI	1	1	1	1	0	5	0
1963	0	2	55.3616	1	1	0	1.4	0	0	956	26	1	3	PCI	1	1	1	1	1	5	0
1964	1	1	74.9562	1	0	0	1.36998	0	0	3004.65	67	1	3	PCI	1	1	1	1	0	4.07671	0
1965	0	2	41.8932	0	0	0	0.9	1	0	839	66	1	3	PCI	1	0	1	1	0	2.76986	0
1966	0	2	52.1726	1	0	1	0.619777	0	0	2430	38	1	1	PCI	1	1	1	1	0	5	0
1967	0	2	49.2904	0	0	1	1.17434	0	0	800	60	1	2	PCI	1	1	1	1	0	5	0
1968	0	2	49.3808	1	0	1	1.06013	0	0	580	49	1	2	PCI	1	1	1	1	1	5	0
1969	0	1	77.2658	1	0	1	1.1	0	0	870	69	1	2	PCI	1	1	1	1	0	5	0
1970	0	2	54.3452	0	0	1	1.48801	0	0	4800	56	1	1	PCI	1	1	1	1	0	5	0
1971	0	2	52.5918	1	1	0	0.9	0	0	828	60	1	1	PCI	1	1	0	0	0	5	0
1972	1	1	44.7534	0	0	1	1.95788	0	0	2241.14	56	1	3	PCI	1	1	1	1	0	5	0
1973	0	2	50.5342	0	0	0	0.520078	0	0	8210	45	1	3	PCI	1	1	1	1	0	5	0
1974	0	2	63.6301	1	0	1	0.890596	0	0	356	35	1	3	PCI	1	1	1	1	0	5	0
1975	0	1	41.5041	1	0	1	1.29883	0	0	1982	48	1	2	PCI	1	1	1	1	0	5	0
1976	1	2	70.4384	0	0	0	1.26089	0	0	1048	46	1	3	conservative	1	1	1	1	1	5	0
1977	0	2	35.3041	1	1	1	1.1	0	0	418	59	1	3	PCI	1	1	1	1	0	5	0
1978	0	2	49.211	0	0	1	1.6572	0	0	1060	55	1	2	PCI	1	1	1	1	0	5	0
1979	0	2	67.0904	1	0	1	1.97308	1	0	1268.01	52	1	3	conservative	1	1	1	1	0	5	0
1980	1	1	46.6082	1	0	1	1.20066	0	0	902	70	1	1	PCI	1	1	1	1	0	5	0
1981	0	2	69.937	1	0	0	0.735877	0	0	2084	47	1	2	PCI	1	1	1	1	0	5	0
1982	0	2	42.6329	0	1	1	0.8	0	0	7154	36	1	2	PCI	1	1	1	1	1	5	0
1983	0	1	50.8329	1	0	1	1.16376	0	0	192	63	1	2	PCI	1	1	1	1	0	5	0
1984	1	2	85.8274	1	1	0	1.4	0	1	1444	14	1	1	PCI	1	0	1	1	1	1.65753	1
1985	0	2	58.5671	1	0	0	1.2871	0	0	330	63	1	3	PCI	1	1	1	1	1	4.30685	1
1986	0	1	77.9863	1	0	0	1	0	1	512	45	1	2	PCI	1	1	1	1	1	1.3589	0
1987	0	2	51.5699	0	0	1	0.620985	0	0	2158	49	1	1	PCI	1	1	1	1	0	5	0
1988	0	2	52.126	1	0	1	1.93254	0	0	7252	37	1	3	PCI	1	1	1	1	0	5	0
1989	0	2	38.8685	0	0	1	1.08287	0	0	2492	54	1	1	PCI	1	1	1	1	0	5	0
1990	0	2	54.9945	1	0	0	1.55094	0	0	500	41	1	3	PCI	1	1	1	1	1	5	0
1991	0	2	52.2575	1	0	1	1.15769	0	0	2074	51	1	2	PCI	1	1	1	1	0	5	0
1992	0	2	54.4356	0	0	1	1.03425	0	0	1308	60	1	2	PCI	1	1	1	1	0	5	0
1993	1	1	54.5342	1	1	0	4.8	0	0	4700	36	1	1	PCI	1	1	0	1	0	2.89863	1
1994	0	2	51.3918	0	0	1	1.43678	0	0	3008	48	1	2	PCI	1	1	1	1	1	5	0
1995	0	2	37.9589	0	0	1	1.14172	0	0	596	69	1	3	PCI	1	1	0	1	0	5	0
1996	0	2	63.6027	0	0	0	1.19841	0	0	1188	63	1	2	PCI	1	1	1	0	0	5	0
1997	0	2	68.737	0	0	0	2.29308	0	0	3066	41	1	2	PCI	1	0	1	1	1	5	0
1998	1	1	72.0274	1	0	0	0.886977	1	0	4426.99	56	1	3	PCI	1	1	1	1	0	5	0
1999	0	2	57.9671	1	0	1	2.18759	0	0	222	40	1	3	PCI	1	0	1	1	1	5	0
[truncated: 1,841 more rows]
